# Supplementary material for: Risk Factors and Spatiotemporal Analysis of Classical Swine Fever in Ecuador
Source: Viruses. 2023 Jan 19;15(2):288. doi: 10.3390/v15020288 (PMC9966056; doi:10.3390/v15020288)
Supplement: Supplementary file 1 [file viruses-15-00288-s001.zip › suplementary/SM4.csv]

id	dpa_parish	temperature	precipitation	dpa_name_province	dpa_name_parish	time	area	region	relative_risk	pi_index
1	190653	20.5	2881	ZAMORA CHINCHIPE	TUNDAYME	2017-01-01	256.015861501735	3Amazonic	42.5599671520203	100
1041	080166	25.2	852	ESMERALDAS	TACHINA	2017-01-01	70.0615767997518	2Coastal	32.3080413997251	75.5
2081	111354	23.5	834	LOJA	PALETILLAS	2017-01-01	175.342425894537	1Highlands	30.0046411839792	70.5
3121	190653	20.5	2881	ZAMORA CHINCHIPE	TUNDAYME	2018-01-01	256.015861501735	3Amazonic	29.5348607181353	69.4
2	120150	25.3	1590	LOS RIOS	BABAHOYO	2017-01-01	173.71494183336	2Coastal	26.5033566485586	62.3
1042	141251	25.7	2456	MORONA SANTIAGO	SAN JOSE DE MORONA	2017-01-01	518.937905349339	3Amazonic	25.978824949274	59.8
2082	091150	25.1	1013	GUAYAS	NARANJAL	2017-01-01	517.513869879953	2Coastal	24.02424784455	56.3
3122	140153	21.2	2676	MORONA SANTIAGO	GENERAL PROAÑO	2017-01-01	66.729008149492	3Amazonic	23.7746971571287	55.9
3	190650	22.3	2103	ZAMORA CHINCHIPE	EL PANGUI	2017-01-01	155.027674506604	3Amazonic	23.6974521742973	55.7
1043	140556	22.5	2364	MORONA SANTIAGO	TAYUZA	2017-01-01	93.7885731211091	3Amazonic	23.261364555877	54.5
2083	061050	20.2	1479	CHIMBORAZO	CUMANDA	2017-01-01	158.655458247431	1Highlands	22.3075664491999	52.4
3123	140655	21.5	2455	MORONA SANTIAGO	SANTA MARIANITA DE JESUS	2017-01-01	58.8433688904623	3Amazonic	22.1157267927972	51.9
4	080166	25.2	852	ESMERALDAS	TACHINA	2018-01-01	70.0615767997518	2Coastal	22.2395857412167	51.6
1044	080163	25.2	1060	ESMERALDAS	SAN MATEO	2017-01-01	179.354686238541	2Coastal	21.7148848561211	51
2084	130656	24.2	321	MANABI	MEMBRILLAL	2017-01-01	67.9011930391132	2Coastal	22.4616600126746	51
3124	140157	23.1	2699	MORONA SANTIAGO	SEVILLA DON BOSCO	2017-01-01	2300.96888553486	3Amazonic	21.6564390675013	50.9
5	120153	25.1	1804	LOS RIOS	FEBRES CORDERO (LAS JUNTAS)	2017-01-01	359.800838664566	2Coastal	21.2062142853116	49.8
1045	111354	23.5	834	LOJA	PALETILLAS	2018-01-01	175.342425894537	1Highlands	20.7601595258566	48.8
2085	190653	20.5	2881	ZAMORA CHINCHIPE	TUNDAYME	2019-01-01	256.015861501735	3Amazonic	20.5792016304782	48.2
3125	030362	22.3	1935	CAÑAR	VENTURA	2017-01-01	68.3362828241788	1Highlands	20.5304200528893	47.9
6	140357	21.8	2632	MORONA SANTIAGO	STA SUSANA DE CHIVIAZA (CAB EN CHIVIAZA)	2017-01-01	283.972634389709	3Amazonic	20.0273163464884	46.9
1046	092150	24.2	384	GUAYAS	GENERAL VILLAMIL (PLAYAS)	2017-01-01	268.422138455769	2Coastal	20.1592716311879	46.8
2086	140652	23	2386	MORONA SANTIAGO	HUAMBI	2017-01-01	161.018963157732	3Amazonic	19.7481580126455	46.4
3126	080154	25.5	1347	ESMERALDAS	CHINCA	2017-01-01	224.17282709888	2Coastal	19.6173641334954	45.9
7	080651	24.9	1393	ESMERALDAS	LA UNION	2017-01-01	114.417305332275	2Coastal	18.6088054624575	43.7
1047	120150	25.3	1590	LOS RIOS	BABAHOYO	2018-01-01	173.71494183336	2Coastal	18.5507060172644	43.6
2087	020160	23.3	2223	BOLIVAR	SAN LUIS DE PAMBIL	2017-01-01	125.707145275801	1Highlands	18.2303763297058	42.8
3127	141250	24.5	2446	MORONA SANTIAGO	SANTIAGO	2017-01-01	650.616332261286	3Amazonic	18.334622325874	42.3
8	110455	21.6	1329	LOJA	POZUL (SAN JUAN DE POZUL)	2017-01-01	79.9303058566623	1Highlands	17.9401378859568	41.7
1048	141251	25.7	2456	MORONA SANTIAGO	SAN JOSE DE MORONA	2018-01-01	518.937905349339	3Amazonic	18.1197988513649	41.2
2088	140253	21.9	2332	MORONA SANTIAGO	BOMBOIZA	2017-01-01	683.623086596355	3Amazonic	17.5369298761089	41.1
3128	071257	24.7	863	EL ORO	BELLAMARIA	2017-01-01	110.17439700049	2Coastal	17.391151222568	40.7
9	020251	20.3	1537	BOLIVAR	SAN JOSE DEL TAMBO (TAMBOPAMBA)	2017-01-01	238.846610283148	1Highlands	17.1499307048343	40.3
1049	140551	18.5	2397	MORONA SANTIAGO	COPAL	2017-01-01	471.969201954905	3Amazonic	17.3250677615171	40
2089	190350	21.8	2321	ZAMORA CHINCHIPE	GUAYZIMI	2017-01-01	184.382632000041	3Amazonic	17.0660208091056	39.6
3129	110959	23	1363	LOJA	YAMANA	2017-01-01	22.3497798151689	1Highlands	17.0378551628366	39.5
10	091150	25.1	1013	GUAYAS	NARANJAL	2018-01-01	517.513869879953	2Coastal	16.6967654184982	39
1050	070150	25.2	512	EL ORO	MACHALA	2017-01-01	202.428707561397	2Coastal	16.5884272789763	38.9
2090	090150	25.4	625	GUAYAS	GUAYAQUIL	2017-01-01	2429.63843988281	2Coastal	16.2851221910889	38.3
3130	090250	25.3	1420	GUAYAS	ALFREDO BAQUERIZO MORENO (JUJAN)	2017-01-01	218.655798677267	2Coastal	16.2046757415539	38
11	190650	22.3	2103	ZAMORA CHINCHIPE	EL PANGUI	2018-01-01	155.027674506604	3Amazonic	16.0456166731439	37.7
1051	120553	25	2111	LOS RIOS	SAN CARLOS	2017-01-01	84.7890307506519	2Coastal	16.1308335516958	37.6
2091	120650	25.4	1904	LOS RIOS	CATARAMA	2017-01-01	48.6555488994827	2Coastal	16.001168862035	37.4
3131	160252	20.3	4089	PASTAZA	SHELL	2017-01-01	33.8650842409097	3Amazonic	16.016166602605	37
12	140556	22.5	2364	MORONA SANTIAGO	TAYUZA	2018-01-01	93.7885731211091	3Amazonic	15.7423239865943	36.8
1052	220156	24.6	3303	ORELLANA	GARCIA MORENO	2017-01-01	129.227232959441	3Amazonic	15.6086043824194	36.1
2092	080166	25.2	852	ESMERALDAS	TACHINA	2019-01-01	70.0615767997518	2Coastal	15.6536560175992	35.8
3132	080163	25.2	1060	ESMERALDAS	SAN MATEO	2018-01-01	179.354686238541	2Coastal	15.2064329458092	35.7
13	141051	22.7	2663	MORONA SANTIAGO	YAUPI	2017-01-01	854.749447346612	3Amazonic	15.4826959017499	35.5
1053	091651	25.5	1012	GUAYAS	TARIFA	2017-01-01	136.091861684394	2Coastal	15.1524413279524	35.4
2093	140153	21.2	2676	MORONA SANTIAGO	GENERAL PROAÑO	2018-01-01	66.729008149492	3Amazonic	15.0520780531314	35.4
3133	140157	23.1	2699	MORONA SANTIAGO	SEVILLA DON BOSCO	2018-01-01	2300.96888553486	3Amazonic	15.0785034997041	35.4
1054	120153	25.1	1804	LOS RIOS	FEBRES CORDERO (LAS JUNTAS)	2018-01-01	359.800838664566	2Coastal	14.7994822357962	34.8
14	070651	25.2	674	EL ORO	BARBONES (SUCRE)	2017-01-01	60.7037446379955	2Coastal	16.1409820100119	34.8
2094	130656	24.2	321	MANABI	MEMBRILLAL	2018-01-01	67.9011930391132	2Coastal	15.6313144670976	34.7
15	141050	22.5	2375	MORONA SANTIAGO	LOGROÑO	2017-01-01	54.9165468322772	3Amazonic	15.0741161161951	34.2
3134	070652	25.2	582	EL ORO	LA IBERIA	2017-01-01	13.4942398309368	2Coastal	15.873953329798	34.2
1055	111354	23.5	834	LOJA	PALETILLAS	2019-01-01	175.342425894537	1Highlands	14.5231997462854	34.1
2095	220150	24.7	3349	ORELLANA	PUERTO FRANCISCO DE ORELLANA (EL COCA)	2017-01-01	145.466565090009	3Amazonic	14.6951537326449	34
3135	140655	21.5	2455	MORONA SANTIAGO	SANTA MARIANITA DE JESUS	2018-01-01	58.8433688904623	3Amazonic	14.5652736776918	34
16	190653	20.5	2881	ZAMORA CHINCHIPE	TUNDAYME	2020-01-01	256.015861501735	3Amazonic	14.5436875537699	33.9
1056	140156	20	2856	MORONA SANTIAGO	SAN ISIDRO	2017-01-01	128.600260146987	3Amazonic	14.3080247500033	33.5
2096	140557	22.2	2537	MORONA SANTIAGO	SAN FRANCISCO DE CHINIMBIMI	2017-01-01	133.48588490468	3Amazonic	14.3333051261927	32.6
17	190651	22.3	2099	ZAMORA CHINCHIPE	EL GUISME	2017-01-01	94.2140278438425	3Amazonic	14.2627347344093	32.5
3136	140357	21.8	2632	MORONA SANTIAGO	STA SUSANA DE CHIVIAZA (CAB EN CHIVIAZA)	2018-01-01	283.972634389709	3Amazonic	13.9501426775288	32.5
1057	030362	22.3	1935	CAÑAR	VENTURA	2018-01-01	68.3362828241788	1Highlands	13.9625594844338	32.2
2097	120752	25.2	2054	LOS RIOS	ZAPOTAL	2017-01-01	246.540033819759	2Coastal	13.7555991816906	32.2
3137	080154	25.5	1347	ESMERALDAS	CHINCA	2018-01-01	224.17282709888	2Coastal	13.8072107760643	32
1058	111352	24.4	612	LOJA	GARZAREAL	2017-01-01	190.054805758104	1Highlands	14.1997058155516	31.9
18	070653	25.2	735	EL ORO	TENDALES (CAB. EN PUERTO TENDALES)	2017-01-01	171.682399902272	2Coastal	14.3824109610851	31.9
2098	140652	23	2386	MORONA SANTIAGO	HUAMBI	2018-01-01	161.018963157732	3Amazonic	13.6186734631458	31.9
3138	140554	23.5	2418	MORONA SANTIAGO	SAN LUIS DE EL ACHO (CAB EN EL ACHO)	2017-01-01	59.8908355151709	3Amazonic	13.6711148284828	31.3
1059	140258	17.8	1820	MORONA SANTIAGO	EL IDEAL	2017-01-01	98.7773763623001	3Amazonic	13.5327683921138	31.1
19	092150	24.2	384	GUAYAS	GENERAL VILLAMIL (PLAYAS)	2018-01-01	268.422138455769	2Coastal	13.6169957873262	31.1
2099	140162	21.7	3278	MORONA SANTIAGO	CUCHAENTZA	2017-01-01	354.426550770829	3Amazonic	14.1563360585459	31
3139	091151	25.4	1237	GUAYAS	JESUS MARIA	2017-01-01	90.8797925213457	2Coastal	13.5555480441131	30.8
1060	120150	25.3	1590	LOS RIOS	BABAHOYO	2019-01-01	173.71494183336	2Coastal	12.9328005857958	30.4
20	070953	25	641	EL ORO	LA PEAÑA	2017-01-01	16.8255364622493	2Coastal	13.5712949696309	30.4
2100	080651	24.9	1393	ESMERALDAS	LA UNION	2018-01-01	114.417305332275	2Coastal	12.6885073359703	29.8
3140	080852	24.5	2645	ESMERALDAS	LA VILLEGAS	2017-01-01	57.8952923262978	2Coastal	12.9430295219841	29.7
21	070152	25.2	556	EL ORO	EL RETIRO	2017-01-01	121.188416512158	2Coastal	13.1619340466173	29.4
1061	070956	25	717	EL ORO	CAÑAQUEMADA	2017-01-01	25.1733676783002	2Coastal	13.0933373812801	29.2
2101	020160	23.3	2223	BOLIVAR	SAN LUIS DE PAMBIL	2018-01-01	125.707145275801	1Highlands	12.4121173355869	29.1
3141	141250	24.5	2446	MORONA SANTIAGO	SANTIAGO	2018-01-01	650.616332261286	3Amazonic	12.8013845805975	29
22	061050	20.2	1479	CHIMBORAZO	CUMANDA	2018-01-01	158.655458247431	1Highlands	12.2473542673055	28.8
1062	070650	25.1	716	EL ORO	EL GUABO	2017-01-01	204.236265171525	2Coastal	12.7059669955336	28.7
2102	091153	25.5	879	GUAYAS	SANTA ROSA DE FLANDES	2017-01-01	115.60678333147	2Coastal	12.6835432565879	28.7
23	190652	22.2	2201	ZAMORA CHINCHIPE	PACHICUTZA	2017-01-01	125.831513154904	3Amazonic	12.6151558829188	28.7
3142	121150	24	2585	LOS RIOS	VALENCIA	2017-01-01	977.857667136377	2Coastal	12.2352946040112	28.7
1063	210250	23.6	2849	SUCUMBIOS	LUMBAQUI	2017-01-01	317.781116017885	3Amazonic	12.5350738601718	28.5
2103	140253	21.9	2332	MORONA SANTIAGO	BOMBOIZA	2018-01-01	683.623086596355	3Amazonic	12.1710189211997	28.4
3143	110455	21.6	1329	LOJA	POZUL (SAN JUAN DE POZUL)	2018-01-01	79.9303058566623	1Highlands	12.3572663551431	28.3
24	141251	25.7	2456	MORONA SANTIAGO	SAN JOSE DE MORONA	2019-01-01	518.937905349339	3Amazonic	12.7153128723786	28.2
1064	240350	24.1	122	SANTA ELENA	SALINAS	2017-01-01	27.3859321328209	2Coastal	14.1001989706527	28
2104	071251	25.3	597	EL ORO	BELLAVISTA	2017-01-01	49.1222599567818	2Coastal	12.577901145276	27.9
3144	110959	23	1363	LOJA	YAMANA	2018-01-01	22.3497798151689	1Highlands	12.1885332810317	27.9
1065	131951	23.7	354	MANABI	MACHALILLA	2017-01-01	141.07764799553	2Coastal	12.1293876070767	27.8
25	110451	23.1	1097	LOJA	CRUZPAMBA (CAB EN CARLOS BUSTAMANTE)	2017-01-01	26.8731122338543	1Highlands	12.6567867246437	27.8
2105	020251	20.3	1537	BOLIVAR	SAN JOSE DEL TAMBO (TAMBOPAMBA)	2018-01-01	238.846610283148	1Highlands	11.8353640990557	27.7
3145	071254	25.3	632	EL ORO	SAN ANTONIO	2017-01-01	23.642641004478	2Coastal	12.5652882207652	27.7
26	071257	24.7	863	EL ORO	BELLAMARIA	2018-01-01	110.17439700049	2Coastal	11.9145505540299	27.6
1066	140551	18.5	2397	MORONA SANTIAGO	COPAL	2018-01-01	471.969201954905	3Amazonic	12.0734674926876	27.4
1067	190350	21.8	2321	ZAMORA CHINCHIPE	GUAYZIMI	2018-01-01	184.382632000041	3Amazonic	11.8007951443697	27
2106	090150	25.4	625	GUAYAS	GUAYAQUIL	2018-01-01	2429.63843988281	2Coastal	11.4914851769275	27
27	111353	24.1	432	LOJA	LIMONES	2017-01-01	231.682194845331	1Highlands	12.5253446261179	27
3146	091150	25.1	1013	GUAYAS	NARANJAL	2019-01-01	517.513869879953	2Coastal	11.7037004035619	27
2107	900451	24.6	1923	GUAYAS	EL PIEDRERO	2017-01-01	170.163145557469	2Coastal	12.0899424647458	26.9
28	150150	23.1	4257	NAPO	TENA	2017-01-01	79.5688976679178	3Amazonic	11.5889305089595	26.9
3147	091152	25.2	1392	GUAYAS	SAN CARLOS	2017-01-01	89.6725410999758	2Coastal	11.8587527001916	26.9
1068	070352	18.2	1085	EL ORO	CORDONCILLO	2017-01-01	30.8343395679013	2Coastal	12.0950985994095	26.8
2108	110450	21.6	1339	LOJA	CELICA	2017-01-01	240.267918601129	1Highlands	11.3976444508819	26.6
3148	120553	25	2111	LOS RIOS	SAN CARLOS	2018-01-01	84.7890307506519	2Coastal	11.5261626211604	26.6
29	190650	22.3	2103	ZAMORA CHINCHIPE	EL PANGUI	2019-01-01	155.027674506604	3Amazonic	11.2969252884115	26.5
1069	011050	12.1	699	AZUAY	SAN FELIPE DE OÑA	2017-01-01	221.350635145495	1Highlands	11.6217652884888	26.4
2109	070150	25.2	512	EL ORO	MACHALA	2018-01-01	202.428707561397	2Coastal	11.3379886130977	26.4
3149	090250	25.3	1420	GUAYAS	ALFREDO BAQUERIZO MORENO (JUJAN)	2018-01-01	218.655798677267	2Coastal	11.3286794180823	26.4
30	070750	25.4	344	EL ORO	HUAQUILLAS	2017-01-01	63.5663014742921	2Coastal	12.4714330688676	26.3
1070	111053	23.1	1205	LOJA	EL LIMO (MARIANA DE JESUS)	2017-01-01	204.037277983773	1Highlands	11.772795124714	26.2
2110	111350	24.6	457	LOJA	ZAPOTILLO	2017-01-01	194.847644757136	1Highlands	11.660806068864	26.2
3150	120650	25.4	1904	LOS RIOS	CATARAMA	2018-01-01	48.6555488994827	2Coastal	11.2749594459864	26.2
31	120750	25.4	2087	LOS RIOS	VENTANAS	2017-01-01	168.209904760393	2Coastal	11.1214130543181	26.1
1071	160154	21.1	4482	PASTAZA	DIEZ DE AGOSTO	2017-01-01	93.1479406361985	3Amazonic	11.1952641033124	26
2111	070951	25.1	658	EL ORO	BUENAVISTA	2017-01-01	40.9876334970628	2Coastal	11.6183276185879	25.8
3151	140150	21.1	2650	MORONA SANTIAGO	MACAS	2017-01-01	53.5170435768361	3Amazonic	11.3942562360089	25.8
1072	240351	24	141	SANTA ELENA	ANCONCITO	2017-01-01	8.93608157738588	2Coastal	12.9482387431467	25.7
32	080750	25.4	1121	ESMERALDAS	RIOVERDE	2017-01-01	71.8053521921063	2Coastal	11.0372676017976	25.7
2112	120154	25.4	1582	LOS RIOS	PIMOCHA	2017-01-01	268.670947677308	2Coastal	10.8972413814973	25.5
3152	140556	22.5	2364	MORONA SANTIAGO	TAYUZA	2019-01-01	93.7885731211091	3Amazonic	11.031613480161	25.5
1073	070952	24.4	935	EL ORO	CASACAY	2017-01-01	60.5882962057169	2Coastal	11.4250462117525	25.3
33	220353	24.7	3397	ORELLANA	SAN CARLOS	2017-01-01	134.333983576004	3Amazonic	10.9877878624444	25.3
2113	220156	24.6	3303	ORELLANA	GARCIA MORENO	2018-01-01	129.227232959441	3Amazonic	11.0034949453513	25.1
3153	140553	22.7	2548	MORONA SANTIAGO	PATUCA	2017-01-01	256.357748646606	3Amazonic	10.9304558136153	25.1
1074	140655	21.5	2455	MORONA SANTIAGO	SANTA MARIANITA DE JESUS	2019-01-01	58.8433688904623	3Amazonic	10.7700180653159	24.9
34	080163	25.2	1060	ESMERALDAS	SAN MATEO	2019-01-01	179.354686238541	2Coastal	10.6383191005276	24.9
2114	071253	24.9	787	EL ORO	LA AVANZADA	2017-01-01	65.7843633764011	2Coastal	11.139349979885	24.8
3154	111453	23	1068	LOJA	MILAGROS	2017-01-01	90.7769391029227	1Highlands	11.1472138314752	24.8
1075	111351	23	728	LOJA	MANGAHURCO	2017-01-01	171.993532064061	1Highlands	11.5623884812001	24.7
2115	140157	23.1	2699	MORONA SANTIAGO	SEVILLA DON BOSCO	2019-01-01	2300.96888553486	3Amazonic	10.5769786452125	24.7
35	091154	25.5	1014	GUAYAS	TAURA	2017-01-01	918.78851925035	2Coastal	10.8345615384241	24.7
1076	111452	23.1	1225	LOJA	12 DE DICIEMBRE (CAB. EN ACHIOTES)	2017-01-01	43.5331879357359	1Highlands	11.0197944537627	24.6
2116	131450	24.5	512	MANABI	BAHIA DE CARAQUEZ	2017-01-01	183.285277696096	2Coastal	10.8105531130264	24.6
3155	080166	25.2	852	ESMERALDAS	TACHINA	2020-01-01	70.0615767997518	2Coastal	11.042660743742	24.6
36	071256	24.5	884	EL ORO	VICTORIA	2017-01-01	70.8413717653868	2Coastal	11.0159002267371	24.6
3156	111355	23.3	749	LOJA	BOLASPAMBA	2017-01-01	131.527571380619	1Highlands	11.0555762352046	24.4
1077	091651	25.5	1012	GUAYAS	TARIFA	2018-01-01	136.091861684394	2Coastal	10.5069901017138	24.3
2117	110456	23.5	829	LOJA	SABANILLA	2017-01-01	139.698580007999	1Highlands	10.7481064296116	24.3
37	070255	25.4	574	EL ORO	CARCABON	2017-01-01	77.9800849570348	2Coastal	11.1849841793963	24.3
1078	141051	22.7	2663	MORONA SANTIAGO	YAUPI	2018-01-01	854.749447346612	3Amazonic	10.7993783744156	24.2
2118	141052	19.8	3193	MORONA SANTIAGO	SHIMPIS	2017-01-01	259.627427493573	3Amazonic	11.0343038063861	24.2
3157	080168	25	899	ESMERALDAS	VUELTA LARGA	2017-01-01	73.6957819474648	2Coastal	11.0802685696879	24.2
38	120153	25.1	1804	LOS RIOS	FEBRES CORDERO (LAS JUNTAS)	2019-01-01	359.800838664566	2Coastal	10.3064067131331	24.2
1079	140153	21.2	2676	MORONA SANTIAGO	GENERAL PROAÑO	2019-01-01	66.729008149492	3Amazonic	10.2910959699217	24.1
3158	160252	20.3	4089	PASTAZA	SHELL	2018-01-01	33.8650842409097	3Amazonic	10.6219912721215	24.1
39	110457	22.5	1171	LOJA	TNTE. MAXIMILIANO RODRIGUEZ LOAIZA	2017-01-01	34.8355119964838	1Highlands	10.8831480826979	24.1
2119	140353	22.7	2592	MORONA SANTIAGO	SAN ANTONIO (CAB EN SAN ANTONIO CENTRO)	2017-01-01	803.804172857082	3Amazonic	10.5672101507505	24
3159	070654	23.9	1051	EL ORO	RIO BONITO	2017-01-01	153.487102261493	2Coastal	10.7513852451362	23.9
40	071450	24.6	932	EL ORO	LA VICTORIA	2017-01-01	109.171207805511	2Coastal	11.0758930141637	23.9
1080	080152	24.8	1021	ESMERALDAS	CAMARONES (CAB. EN SAN VICENTE)	2017-01-01	165.578417443687	2Coastal	10.6021197583897	23.8
2120	092251	25	1705	GUAYAS	CRNEL. LORENZO DE GARAICOA (PEDREGAL)	2017-01-01	163.404666948246	2Coastal	10.4059393321787	23.5
3160	111354	23.5	834	LOJA	PALETILLAS	2020-01-01	175.342425894537	1Highlands	10.0598920819144	23.5
41	130656	24.2	321	MANABI	MEMBRILLAL	2019-01-01	67.9011930391132	2Coastal	10.9616948952612	23.4
1081	220150	24.7	3349	ORELLANA	PUERTO FRANCISCO DE ORELLANA (EL COCA)	2018-01-01	145.466565090009	3Amazonic	10.2490037648728	23.3
1082	110853	22.7	995	LOJA	SABIANGO (LA CAPILLA)	2017-01-01	45.3350215284337	1Highlands	10.5777785357038	23.3
2121	070651	25.2	674	EL ORO	BARBONES (SUCRE)	2018-01-01	60.7037446379955	2Coastal	11.2567188327219	23.3
3161	071054	24.9	907	EL ORO	PIEDRAS	2017-01-01	40.3661591245501	2Coastal	10.5186493307281	23.3
42	092250	25.1	1573	GUAYAS	SIMON BOLIVAR	2017-01-01	128.201286007236	2Coastal	10.2935916549731	23.3
2122	160150	21.2	4438	PASTAZA	PUYO	2017-01-01	87.5943987843427	3Amazonic	9.95331405735914	23.2
1083	140164	10.5	1660	MORONA SANTIAGO	RIO BLANCO	2017-01-01	454.618683540797	3Amazonic	10.0915048797407	23.1
3162	160152	23.5	3918	PASTAZA	CANELOS	2017-01-01	450.369793782056	3Amazonic	10.4139964805669	23.1
43	090350	25.3	866	GUAYAS	BALAO	2017-01-01	409.230587299935	2Coastal	10.2196624680602	23.1
2123	080150	25.2	814	ESMERALDAS	ESMERALDAS	2017-01-01	67.5180727617247	2Coastal	10.9513383931879	23
3163	030452	25.1	1588	CAÑAR	PANCHO NEGRO	2017-01-01	160.818373600372	1Highlands	10.0830210703753	23
1084	091053	25.2	1382	GUAYAS	MARISCAL SUCRE (HUAQUES)	2017-01-01	54.8693914769173	2Coastal	10.1758361218507	22.7
2124	141050	22.5	2375	MORONA SANTIAGO	LOGROÑO	2018-01-01	54.9165468322772	3Amazonic	10.27957853671	22.7
44	030362	22.3	1935	CAÑAR	VENTURA	2019-01-01	68.3362828241788	1Highlands	10.0243485539503	22.7
3164	090750	25.6	883	GUAYAS	ELOY ALFARO (DURAN)	2017-01-01	300.556622634042	2Coastal	10.1145807396366	22.6
45	110852	22	934	LOJA	LA VICTORIA	2017-01-01	67.8400790143311	1Highlands	10.6600174070282	22.6
1085	090156	24.6	404	GUAYAS	POSORJA	2017-01-01	75.3183888740446	2Coastal	10.6238321499905	22.5
2125	140156	20	2856	MORONA SANTIAGO	SAN ISIDRO	2018-01-01	128.600260146987	3Amazonic	9.69338786015051	22.5
3165	140751	21.6	3342	MORONA SANTIAGO	CHIGUAZA	2017-01-01	479.432151666751	3Amazonic	10.0452972798176	22.5
1086	080350	25.2	1835	ESMERALDAS	MUISNE	2017-01-01	173.975605598185	2Coastal	9.60662138209637	22.4
1087	240352	24.2	144	SANTA ELENA	JOSE LUIS TAMAYO (MUEY)	2017-01-01	33.9837799496728	2Coastal	11.0472122012964	22.4
2126	180254	17	1475	TUNGURAHUA	ULBA	2017-01-01	88.06080324645	1Highlands	10.0227113126377	22.4
3166	140357	21.8	2632	MORONA SANTIAGO	STA SUSANA DE CHIVIAZA (CAB EN CHIVIAZA)	2019-01-01	283.972634389709	3Amazonic	9.758740311941	22.4
46	080154	25.5	1347	ESMERALDAS	CHINCA	2019-01-01	224.17282709888	2Coastal	9.82586717444489	22.4
47	140652	23	2386	MORONA SANTIAGO	HUAMBI	2019-01-01	161.018963157732	3Amazonic	9.62299611699464	22.4
2127	110253	16.7	1215	LOJA	UTUANA	2017-01-01	120.97484846881	1Highlands	10.179224362651	22.3
3167	190752	22.3	2165	ZAMORA CHINCHIPE	TRIUNFO-DORADO	2017-01-01	53.2326964034445	3Amazonic	10.0842070228192	22.3
48	140356	22.4	2483	MORONA SANTIAGO	SAN MIGUEL DE CONCHAY	2017-01-01	128.598596502857	3Amazonic	10.0147927053603	22.3
1088	071451	23.5	1196	EL ORO	LA LIBERTAD	2017-01-01	82.9160380740957	2Coastal	10.3763981193514	22.2
2128	120752	25.2	2054	LOS RIOS	ZAPOTAL	2018-01-01	246.540033819759	2Coastal	9.55680469831534	22.1
1089	140557	22.2	2537	MORONA SANTIAGO	SAN FRANCISCO DE CHINIMBIMI	2018-01-01	133.48588490468	3Amazonic	9.92402690547119	22
3168	070950	24.7	860	EL ORO	PASAJE	2017-01-01	131.838457770111	2Coastal	9.74491148978653	22
49	070954	23.6	997	EL ORO	PROGRESO	2017-01-01	149.803172187303	2Coastal	9.88145854589582	22
2129	080354	24.6	1485	ESMERALDAS	QUINGUE (OLMEDO PERDOMO FRANCO)	2017-01-01	28.0758672944357	2Coastal	11.2309757674374	21.9
3169	160165	21.4	4411	PASTAZA	VERACRUZ (INDILLAMA) (CAB. EN INDILLAMA)	2017-01-01	169.44336068284	3Amazonic	9.41060190956408	21.9
50	120550	25.1	2148	LOS RIOS	QUEVEDO	2017-01-01	190.895206139925	2Coastal	9.40213613900544	21.9
1090	190651	22.3	2099	ZAMORA CHINCHIPE	EL GUISME	2018-01-01	94.2140278438425	3Amazonic	9.80287823892978	21.8
2130	240250	24.2	152	SANTA ELENA	LA LIBERTAD	2017-01-01	25.1749832232812	2Coastal	10.5954595225689	21.8
3170	131350	24.7	860	MANABI	SANTA ANA DE VUELTA LARGA	2017-01-01	315.529921875266	2Coastal	9.34943739015357	21.6
1091	090152	24.5	568	GUAYAS	JUAN GOMEZ RENDON (PROGRESO)	2017-01-01	322.752690370829	2Coastal	9.80858653778145	21.5
2131	092150	24.2	384	GUAYAS	GENERAL VILLAMIL (PLAYAS)	2019-01-01	268.422138455769	2Coastal	9.64716889873731	21.5
51	070653	25.2	735	EL ORO	TENDALES (CAB. EN PUERTO TENDALES)	2018-01-01	171.682399902272	2Coastal	10.0283354000247	21.5
1092	140853	21.8	2450	MORONA SANTIAGO	SAN JACINTO DE WAKAMBEIS	2017-01-01	44.3335712094309	3Amazonic	9.71541756334346	21.4
2132	240151	24	181	SANTA ELENA	ATAHUALPA	2017-01-01	77.4800438822145	2Coastal	10.2004843286093	21.4
3171	111352	24.4	612	LOJA	GARZAREAL	2018-01-01	190.054805758104	1Highlands	9.86540867988021	21.4
52	120155	25.2	1925	LOS RIOS	LA UNION	2017-01-01	186.710289527272	2Coastal	9.46947916180767	21.4
3172	150950	21.9	4196	NAPO	CARLOS JULIO AROSEMENA TOLA	2017-01-01	501.203476750034	3Amazonic	9.14704227386615	21.3
1093	121050	24.9	2318	LOS RIOS	SAN JACINTO DE BUENA FE	2017-01-01	415.09797007413	2Coastal	9.14003527077416	21.2
53	120150	25.3	1590	LOS RIOS	BABAHOYO	2020-01-01	173.71494183336	2Coastal	9.09620145180379	21.2
2133	092056	25.5	958	GUAYAS	VIRGEN DE FATIMA	2017-01-01	53.0273651531769	2Coastal	9.45548576670642	21.1
3173	140258	17.8	1820	MORONA SANTIAGO	EL IDEAL	2018-01-01	98.7773763623001	3Amazonic	9.36726861325593	21
1094	091151	25.4	1237	GUAYAS	JESUS MARIA	2018-01-01	90.8797925213457	2Coastal	9.45444349468822	20.9
54	080755	25.4	1450	ESMERALDAS	ROCAFUERTE	2017-01-01	123.79427546302	2Coastal	9.7059002772211	20.9
2134	011551	22.7	1112	AZUAY	EL CARMEN DE PIJILI	2017-01-01	370.595140970783	1Highlands	9.34817986496822	20.8
1095	131250	25.5	484	MANABI	ROCAFUERTE	2017-01-01	279.975836879413	2Coastal	8.98862639252838	20.7
2135	140162	21.7	3278	MORONA SANTIAGO	CUCHAENTZA	2018-01-01	354.426550770829	3Amazonic	9.86663319830418	20.7
3174	080650	24.9	1146	ESMERALDAS	ATACAMES	2017-01-01	104.825032788409	2Coastal	9.5137178851912	20.7
3175	140554	23.5	2418	MORONA SANTIAGO	SAN LUIS DE EL ACHO (CAB EN EL ACHO)	2018-01-01	59.8908355151709	3Amazonic	9.24347310273199	20.7
55	121350	24.9	2206	LOS RIOS	QUINSALOMA	2017-01-01	282.975859114358	2Coastal	8.86315749488509	20.7
56	090153	24.6	423	GUAYAS	MORRO	2017-01-01	265.025132245782	2Coastal	9.41268356192056	20.6
1096	070953	25	641	EL ORO	LA PEAÑA	2018-01-01	16.8255364622493	2Coastal	9.44896281070747	20.5
2136	091054	25.2	1340	GUAYAS	ROBERTO ASTUDILLO (CAB. EN CRUCE DE VENECIA)	2017-01-01	87.7732144770558	2Coastal	9.09366229667832	20.5
3176	120152	25.3	1893	LOS RIOS	CARACOL	2017-01-01	97.9172311013292	2Coastal	9.00896076224489	20.4
57	140650	22.1	2306	MORONA SANTIAGO	SUCUA	2017-01-01	471.746846372294	3Amazonic	8.91268858575168	20.4
1097	071250	25.2	582	EL ORO	SANTA ROSA	2017-01-01	182.438865517912	2Coastal	9.0237123135458	20.3
2137	091051	25.4	1110	GUAYAS	CHOBO	2017-01-01	42.2890517452231	2Coastal	9.24308302533168	20.3
3177	092050	25.5	1072	GUAYAS	SAN JACINTO DE YAGUACHI	2017-01-01	272.555823133118	2Coastal	9.0155114069412	20.3
1098	120555	24.8	2330	LOS RIOS	LA ESPERANZA	2017-01-01	28.9789974492509	2Coastal	9.28407583310734	20.2
2138	140256	20.1	2212	MORONA SANTIAGO	NUEVA TARQUI	2017-01-01	34.986465363568	3Amazonic	9.28189095967612	20.2
58	080165	24.6	1169	ESMERALDAS	TABIAZO	2017-01-01	138.289250377004	2Coastal	9.15103386574552	20.2
1099	140750	21.9	3618	MORONA SANTIAGO	HUAMBOYA	2017-01-01	183.821924393194	3Amazonic	9.16123177894055	20.1
3178	080453	25	2694	ESMERALDAS	MALIMPIA	2017-01-01	1167.7383023873	2Coastal	8.65885112250505	20.1
59	092053	25.4	1148	GUAYAS	GRAL. PEDRO J. MONTERO (BOLICHE)	2017-01-01	75.2837183926239	2Coastal	8.92450099044377	20.1
2139	080651	24.9	1393	ESMERALDAS	LA UNION	2019-01-01	114.417305332275	2Coastal	8.56791406590755	20
1100	092055	25.5	1027	GUAYAS	YAGUACHI VIEJO (CONE)	2017-01-01	108.71350294684	2Coastal	8.87967875475404	19.9
3179	020160	23.3	2223	BOLIVAR	SAN LUIS DE PAMBIL	2019-01-01	125.707145275801	1Highlands	8.5346900663668	19.9
60	070152	25.2	556	EL ORO	EL RETIRO	2018-01-01	121.188416512158	2Coastal	9.21304365438382	19.9
2140	121150	24	2585	LOS RIOS	VALENCIA	2018-01-01	977.857667136377	2Coastal	8.42627141701247	19.8
3180	240156	23.9	166	SANTA ELENA	SAN JOSE DE ANCON	2017-01-01	66.3031286322062	2Coastal	9.53810093338456	19.8
1101	091650	25.5	1072	GUAYAS	SAMBORONDON	2017-01-01	222.972067518289	2Coastal	8.74565966697171	19.7
2141	140253	21.9	2332	MORONA SANTIAGO	BOMBOIZA	2019-01-01	683.623086596355	3Amazonic	8.53385576174851	19.7
3181	141250	24.5	2446	MORONA SANTIAGO	SANTIAGO	2019-01-01	650.616332261286	3Amazonic	8.97369200875923	19.7
61	070956	25	717	EL ORO	CAÑAQUEMADA	2018-01-01	25.1733676783002	2Coastal	9.12889225497764	19.7
62	080852	24.5	2645	ESMERALDAS	LA VILLEGAS	2018-01-01	57.8952923262978	2Coastal	8.79991439325794	19.6
1102	050251	19.8	2368	COTOPAXI	GUASAGANDA (CAB. EN GUASAGANDA CENTRO)	2017-01-01	247.257400977651	1Highlands	8.32290472844166	19.5
2142	071356	22.9	1371	EL ORO	MALVAS	2017-01-01	13.5216759897651	2Coastal	9.12509391853232	19.5
3182	111051	23.1	1480	LOJA	CIANO	2017-01-01	81.130236855388	1Highlands	8.96032750419801	19.5
1103	091153	25.5	879	GUAYAS	SANTA ROSA DE FLANDES	2018-01-01	115.60678333147	2Coastal	8.84415343557246	19.4
2143	190254	22.8	1304	ZAMORA CHINCHIPE	LA CHONTA	2017-01-01	18.2959817445794	3Amazonic	9.96670233074247	19.4
63	070650	25.1	716	EL ORO	EL GUABO	2018-01-01	204.236265171525	2Coastal	8.85727233496302	19.4
3183	210250	23.6	2849	SUCUMBIOS	LUMBAQUI	2018-01-01	317.781116017885	3Amazonic	8.72469226280211	19.3
1104	190652	22.2	2201	ZAMORA CHINCHIPE	PACHICUTZA	2018-01-01	125.831513154904	3Amazonic	8.70409435077555	19.2
64	190256	22.8	1304	ZAMORA CHINCHIPE	PUCAPAMBA	2017-01-01	22.1370305402618	3Amazonic	9.82730022722542	19.2
2144	110455	21.6	1329	LOJA	POZUL (SAN JUAN DE POZUL)	2019-01-01	79.9303058566623	1Highlands	8.55795531330844	19.1
3184	110959	23	1363	LOJA	YAMANA	2019-01-01	22.3497798151689	1Highlands	8.60910263597411	19.1
65	141251	25.7	2456	MORONA SANTIAGO	SAN JOSE DE MORONA	2020-01-01	518.937905349339	3Amazonic	8.97854675597258	19.1
1105	160162	23.4	3576	PASTAZA	SIMON BOLIVAR (CAB. EN MUSHULLACTA)	2017-01-01	1021.83428057255	3Amazonic	8.41993637112031	19
2145	190952	20.8	2584	ZAMORA CHINCHIPE	NUEVO QUITO	2017-01-01	115.806222055009	3Amazonic	9.09551102821732	19
1106	140455	21.9	3966	MORONA SANTIAGO	16 DE AGOSTO	2017-01-01	94.030304100714	3Amazonic	8.63403478185558	18.9
2146	140552	19.6	2724	MORONA SANTIAGO	CHUPIANZA	2017-01-01	100.637509319457	3Amazonic	8.69511745251813	18.9
3185	080752	25.1	1954	ESMERALDAS	CHUMUNDE	2017-01-01	504.149888542715	2Coastal	8.6293050204789	18.9
66	090150	25.4	625	GUAYAS	GUAYAQUIL	2019-01-01	2429.63843988281	2Coastal	8.03752995117592	18.9
1107	070955	22.9	1075	EL ORO	UZHCURRUMI	2017-01-01	30.863796267758	2Coastal	8.61707866452485	18.8
1108	190650	22.3	2103	ZAMORA CHINCHIPE	EL PANGUI	2020-01-01	155.027674506604	3Amazonic	8.05421008018473	18.8
2147	071254	25.3	632	EL ORO	SAN ANTONIO	2018-01-01	23.642641004478	2Coastal	8.86003994361693	18.8
3186	020251	20.3	1537	BOLIVAR	SAN JOSE DEL TAMBO (TAMBOPAMBA)	2019-01-01	238.846610283148	1Highlands	8.12212029464669	18.8
3187	131650	23.7	911	MANABI	SUCRE	2017-01-01	196.510103099651	2Coastal	8.18653980601908	18.8
67	160450	23.4	3877	PASTAZA	ARAJUNO	2017-01-01	637.336249537413	3Amazonic	8.57931260204091	18.8
68	131951	23.7	354	MANABI	MACHALILLA	2018-01-01	141.07764799553	2Coastal	8.39548883943125	18.8
2148	080652	24.9	1331	ESMERALDAS	SUA (CAB. EN LA BOCANA)	2017-01-01	70.8938073771759	2Coastal	8.62171743805212	18.7
3188	071257	24.7	863	EL ORO	BELLAMARIA	2019-01-01	110.17439700049	2Coastal	8.2515648465834	18.7
1109	140551	18.5	2397	MORONA SANTIAGO	COPAL	2019-01-01	471.969201954905	3Amazonic	8.47251829636936	18.6
69	071251	25.3	597	EL ORO	BELLAVISTA	2018-01-01	49.1222599567818	2Coastal	8.71478594541354	18.6
2149	110451	23.1	1097	LOJA	CRUZPAMBA (CAB EN CARLOS BUSTAMANTE)	2018-01-01	26.8731122338543	1Highlands	8.79127775049143	18.5
3189	140153	21.2	2676	MORONA SANTIAGO	GENERAL PROAÑO	2020-01-01	66.729008149492	3Amazonic	7.95714011261792	18.5
70	110552	23.2	1439	LOJA	EL ROSARIO	2017-01-01	91.9117549371997	1Highlands	8.38708519691071	18.4
1110	020750	24.4	2187	BOLIVAR	LAS NAVES	2017-01-01	148.694355626172	1Highlands	8.17213995263294	18.3
2150	070251	25.5	410	EL ORO	CHACRAS	2017-01-01	120.583130323871	2Coastal	8.87964460056012	18.3
3190	190350	21.8	2321	ZAMORA CHINCHIPE	GUAYZIMI	2019-01-01	184.382632000041	3Amazonic	8.26022948703334	18.3
71	240350	24.1	122	SANTA ELENA	SALINAS	2018-01-01	27.3859321328209	2Coastal	9.82865160684641	18.3
1111	080353	24.6	1413	ESMERALDAS	GALERA	2017-01-01	67.9193853416731	2Coastal	9.16802507355963	18.2
1112	120750	25.4	2087	LOS RIOS	VENTANAS	2018-01-01	168.209904760393	2Coastal	7.76082185506778	18.2
2151	070150	25.2	512	EL ORO	MACHALA	2019-01-01	202.428707561397	2Coastal	7.95674997388263	18.2
3191	070652	25.2	582	EL ORO	LA IBERIA	2018-01-01	13.4942398309368	2Coastal	9.10077590226922	18.2
72	091150	25.1	1013	GUAYAS	NARANJAL	2020-01-01	517.513869879953	2Coastal	8.10809751022947	18.2
1113	111353	24.1	432	LOJA	LIMONES	2018-01-01	231.682194845331	1Highlands	8.80820675210454	18.1
2152	900451	24.6	1923	GUAYAS	EL PIEDRERO	2018-01-01	170.163145557469	2Coastal	8.42974577795341	18.1
3192	090250	25.3	1420	GUAYAS	ALFREDO BAQUERIZO MORENO (JUJAN)	2019-01-01	218.655798677267	2Coastal	7.84546165924165	18.1
73	091152	25.2	1392	GUAYAS	SAN CARLOS	2018-01-01	89.6725410999758	2Coastal	8.26723377279721	18.1
1114	091952	25.4	1171	GUAYAS	LA VICTORIA (ÑAUZA)	2017-01-01	81.5885843056987	2Coastal	8.21619085436871	18
2153	160157	21.5	4257	PASTAZA	POMONA	2017-01-01	55.3401236157114	3Amazonic	8.22232236335962	18
2154	110450	21.6	1339	LOJA	CELICA	2018-01-01	240.267918601129	1Highlands	7.82421663565254	18
3193	070951	25.1	658	EL ORO	BUENAVISTA	2018-01-01	40.9876334970628	2Coastal	8.41411658418309	18
3194	111451	21.4	1506	LOJA	CHAQUINAL	2017-01-01	17.2670549247033	1Highlands	8.32927894296634	18
74	091250	25	1602	GUAYAS	NARANJITO	2017-01-01	224.833665258736	2Coastal	8.03020327768638	18
1115	090656	25.2	870	GUAYAS	LOS LOJAS (ENRIQUE BAQUERIZO MORENO)	2017-01-01	118.507746761444	2Coastal	8.13993095835746	17.8
2155	091050	25.2	1267	GUAYAS	MILAGRO	2017-01-01	220.623621956842	2Coastal	7.8990354234949	17.8
3195	140854	21.3	2586	MORONA SANTIAGO	SANTIAGO DE PANANZA	2017-01-01	88.8993121231845	3Amazonic	8.10746196711622	17.8
75	070250	25.5	563	EL ORO	ARENILLAS	2017-01-01	393.824110571816	2Coastal	7.92290723622997	17.8
1116	120154	25.4	1582	LOS RIOS	PIMOCHA	2018-01-01	268.670947677308	2Coastal	7.61100523394849	17.7
1117	190753	21.9	2117	ZAMORA CHINCHIPE	PANGUINTZA	2017-01-01	44.7299948394641	3Amazonic	8.23015447299444	17.7
2156	140451	21.1	3736	MORONA SANTIAGO	ARAPICOS	2017-01-01	216.072748623883	3Amazonic	8.30932769462193	17.7
3196	140851	21	2465	MORONA SANTIAGO	PAN DE AZUCAR	2017-01-01	84.2447112702531	3Amazonic	8.17436349576155	17.7
76	111350	24.6	457	LOJA	ZAPOTILLO	2018-01-01	194.847644757136	1Highlands	8.15401645925892	17.7
77	190252	22.6	1333	ZAMORA CHINCHIPE	EL CHORRO	2017-01-01	14.8479057002715	3Amazonic	9.04682966422835	17.7
1118	111251	20.7	1131	LOJA	NUEVA FATIMA	2017-01-01	46.4490626055076	1Highlands	8.54803194888926	17.6
2157	011050	12.1	699	AZUAY	SAN FELIPE DE OÑA	2018-01-01	221.350635145495	1Highlands	8.03764986636442	17.6
3197	110850	23.2	892	LOJA	MACARA	2017-01-01	370.918866340076	1Highlands	7.86845325420562	17.6
78	111053	23.1	1205	LOJA	EL LIMO (MARIANA DE JESUS)	2018-01-01	204.037277983773	1Highlands	8.20177915303433	17.6
1119	190351	21.7	2219	ZAMORA CHINCHIPE	ZURMI	2017-01-01	915.1142116519	3Amazonic	8.28127318077046	17.5
2158	080351	25.1	1637	ESMERALDAS	BOLIVAR	2017-01-01	44.177540574317	2Coastal	8.3331831152622	17.5
3198	080356	24.9	1647	ESMERALDAS	SAN FRANCISCO	2017-01-01	189.403984320936	2Coastal	8.44645210488677	17.5
79	071255	23.9	1139	EL ORO	TORATA	2017-01-01	65.3526655272154	2Coastal	8.00936152779391	17.5
1120	150150	23.1	4257	NAPO	TENA	2018-01-01	79.5688976679178	3Amazonic	7.6894412791508	17.4
2159	080153	24.1	1545	ESMERALDAS	CRNEL. CARLOS CONCHA TORRES (CAB. EN HUELE)	2017-01-01	291.354743406133	2Coastal	7.94396754488667	17.4
3199	080163	25.2	1060	ESMERALDAS	SAN MATEO	2020-01-01	179.354686238541	2Coastal	7.49526363099955	17.4
80	071150	23.5	1293	EL ORO	PORTOVELO	2017-01-01	38.3715372105088	2Coastal	7.95399438998117	17.4
1121	140556	22.5	2364	MORONA SANTIAGO	TAYUZA	2020-01-01	93.7885731211091	3Amazonic	7.67593081646702	17.3
2160	160163	21.4	4348	PASTAZA	TARQUI	2017-01-01	87.8077046504646	3Amazonic	7.89415427152457	17.3
3200	070355	22.6	1273	EL ORO	SAN JUAN DE CERRO AZUL	2017-01-01	93.906814342567	2Coastal	7.92792714842096	17.3
81	071452	23.3	1343	EL ORO	EL PARAISO	2017-01-01	77.354373709426	2Coastal	7.93404422855225	17.3
1122	120650	25.4	1904	LOS RIOS	CATARAMA	2019-01-01	48.6555488994827	2Coastal	7.58000287786349	17.2
2161	061050	20.2	1479	CHIMBORAZO	CUMANDA	2019-01-01	158.655458247431	1Highlands	7.33374027567549	17.2
2162	140157	23.1	2699	MORONA SANTIAGO	SEVILLA DON BOSCO	2020-01-01	2300.96888553486	3Amazonic	7.4674760342371	17.2
3201	160154	21.1	4482	PASTAZA	DIEZ DE AGOSTO	2018-01-01	93.1479406361985	3Amazonic	7.56359537722726	17.2
82	120350	25.1	1968	LOS RIOS	MONTALVO	2017-01-01	297.215701217385	2Coastal	7.59194134380308	17.2
1123	070750	25.4	344	EL ORO	HUAQUILLAS	2018-01-01	63.5663014742921	2Coastal	8.55613903945735	17.1
3202	020355	18.5	1543	BOLIVAR	TELIMBELA	2017-01-01	158.180219902111	1Highlands	7.70891923715409	17.1
83	080751	25.2	1521	ESMERALDAS	CHONTADURO	2017-01-01	216.90559204461	2Coastal	7.70957624030061	17.1
2163	070254	25.5	646	EL ORO	PALMALES	2017-01-01	214.182419182979	2Coastal	7.87344837084275	17
3203	111052	21.8	1604	LOJA	EL ARENAL	2017-01-01	28.6077505638886	1Highlands	8.0905268606602	17
84	140655	21.5	2455	MORONA SANTIAGO	SANTA MARIANITA DE JESUS	2020-01-01	58.8433688904623	3Amazonic	7.54423725522639	17
1124	080452	25.4	2188	ESMERALDAS	CHURA (CHANCAMA) (CAB. EN EL YERBERO)	2017-01-01	219.771983482958	2Coastal	7.81055263813275	16.9
1125	240150	24	230	SANTA ELENA	SANTA ELENA	2017-01-01	537.729670052373	2Coastal	7.83402764247864	16.9
2164	160251	21.5	4204	PASTAZA	MADRE TIERRA	2017-01-01	132.171184520285	3Amazonic	7.7239611531102	16.9
3204	071357	22.5	1411	EL ORO	MULUNCAY GRANDE	2017-01-01	7.03578568383687	2Coastal	7.93927389681417	16.9
85	140553	22.7	2548	MORONA SANTIAGO	PATUCA	2018-01-01	256.357748646606	3Amazonic	7.52575176231571	16.9
1126	092550	25.3	789	GUAYAS	NARCISA DE JESUS	2017-01-01	136.813246493227	2Coastal	7.69926860032281	16.8
2165	080750	25.4	1121	ESMERALDAS	RIOVERDE	2018-01-01	71.8053521921063	2Coastal	7.33471466238665	16.8
3205	220161	24.6	3338	ORELLANA	SAN LUIS DE ARMENIA	2017-01-01	318.35318165115	3Amazonic	7.77948232876497	16.8
86	091154	25.5	1014	GUAYAS	TAURA	2018-01-01	918.78851925035	2Coastal	7.54456842274747	16.8
2166	220454	24.2	3196	ORELLANA	SAN JOSE DE DAHUANO	2017-01-01	501.216047403402	3Amazonic	7.78903578464584	16.7
3206	190951	19.7	2747	ZAMORA CHINCHIPE	BELLAVISTA	2017-01-01	57.0164641222034	3Amazonic	8.13047382551883	16.7
1127	220156	24.6	3303	ORELLANA	GARCIA MORENO	2019-01-01	129.227232959441	3Amazonic	7.57873065055293	16.6
2167	220452	24.4	3231	ORELLANA	PUERTO MURIALDO	2017-01-01	193.32766552957	3Amazonic	7.70387225683094	16.6
3207	120452	25.4	1687	LOS RIOS	SAN JUAN	2017-01-01	90.9658969311553	2Coastal	7.53267422433286	16.6
87	080653	25	1392	ESMERALDAS	TONCHIGUE	2017-01-01	134.251527814466	2Coastal	7.86387670992986	16.6
88	240351	24	141	SANTA ELENA	ANCONCITO	2018-01-01	8.93608157738588	2Coastal	8.95194502655497	16.6
1128	120153	25.1	1804	LOS RIOS	FEBRES CORDERO (LAS JUNTAS)	2020-01-01	359.800838664566	2Coastal	7.05889390878715	16.5
1129	140255	19.8	2228	MORONA SANTIAGO	EL ROSARIO	2017-01-01	97.286701314795	3Amazonic	7.55362864061531	16.4
2168	080159	24.4	1805	ESMERALDAS	MAJUA	2017-01-01	130.903687114182	2Coastal	7.55920024246057	16.4
3208	010157	16.9	782	AZUAY	MOLLETURO	2017-01-01	977.081212636694	1Highlands	7.3572387232865	16.4
89	140150	21.1	2650	MORONA SANTIAGO	MACAS	2018-01-01	53.5170435768361	3Amazonic	7.5193394823873	16.4
1130	111355	23.3	749	LOJA	BOLASPAMBA	2018-01-01	131.527571380619	1Highlands	7.71688541198791	16.3
2169	220353	24.7	3397	ORELLANA	SAN CARLOS	2018-01-01	134.333983576004	3Amazonic	7.30788268239414	16.3
2170	141051	22.7	2663	MORONA SANTIAGO	YAUPI	2019-01-01	854.749447346612	3Amazonic	7.58137784496681	16.3
3209	070354	22.5	1411	EL ORO	SAN JOSE	2017-01-01	2.22878285021488	2Coastal	7.63198866215168	16.3
90	111351	23	728	LOJA	MANGAHURCO	2018-01-01	171.993532064061	1Highlands	8.0695698373259	16.3
1131	110551	22.5	1495	LOJA	BUENAVISTA	2017-01-01	44.3318836917623	1Highlands	7.43810880564417	16.2
1132	190450	20.3	1748	ZAMORA CHINCHIPE	28 DE MAYO (SAN JOSE DE YACUAMBI)	2017-01-01	483.949728734233	3Amazonic	7.34938787755387	16.2
2171	110851	20.6	1181	LOJA	LARAMA	2017-01-01	93.3840479950929	1Highlands	7.66645182165959	16.2
2172	140353	22.7	2592	MORONA SANTIAGO	SAN ANTONIO (CAB EN SAN ANTONIO CENTRO)	2018-01-01	803.804172857082	3Amazonic	7.35825513880545	16.2
3210	070952	24.4	935	EL ORO	CASACAY	2018-01-01	60.5882962057169	2Coastal	7.66550648859331	16.2
3211	111452	23.1	1225	LOJA	12 DE DICIEMBRE (CAB. EN ACHIOTES)	2018-01-01	43.5331879357359	1Highlands	7.54545426456631	16.2
91	110456	23.5	829	LOJA	SABANILLA	2018-01-01	139.698580007999	1Highlands	7.43899442382397	16.2
92	120451	25.4	1991	LOS RIOS	PUERTO PECHICHE	2017-01-01	81.1668096842774	2Coastal	7.37800122041342	16.2
1133	070255	25.4	574	EL ORO	CARCABON	2018-01-01	77.9800849570348	2Coastal	7.80720654156727	16.1
1134	141052	19.8	3193	MORONA SANTIAGO	SHIMPIS	2018-01-01	259.627427493573	3Amazonic	7.70416375836343	16.1
2173	070352	18.2	1085	EL ORO	CORDONCILLO	2018-01-01	30.8343395679013	2Coastal	7.69077113733357	16.1
3212	080355	25.1	1491	ESMERALDAS	SALIMA	2017-01-01	43.4471484165439	2Coastal	8.09020397316133	16.1
3213	071253	24.9	787	EL ORO	LA AVANZADA	2018-01-01	65.7843633764011	2Coastal	7.55698263346962	16.1
93	180252	16.5	1529	TUNGURAHUA	RIO NEGRO	2017-01-01	628.339063257303	1Highlands	7.25262177597073	16.1
94	120651	25.2	2081	LOS RIOS	RICAURTE	2017-01-01	329.843508090791	2Coastal	7.18211051552261	16.1
1135	131450	24.5	512	MANABI	BAHIA DE CARAQUEZ	2018-01-01	183.285277696096	2Coastal	7.29336082514152	16
2174	080258	25.7	2814	ESMERALDAS	SAN FRANCISCO DE ONZOLE	2017-01-01	165.254993903695	2Coastal	7.55877820052623	16
3214	070654	23.9	1051	EL ORO	RIO BONITO	2018-01-01	153.487102261493	2Coastal	7.50608017468591	16
95	091651	25.5	1012	GUAYAS	TARIFA	2019-01-01	136.091861684394	2Coastal	7.11781825459788	16
1136	071256	24.5	884	EL ORO	VICTORIA	2018-01-01	70.8413717653868	2Coastal	7.42211164240664	15.9
2175	080152	24.8	1021	ESMERALDAS	CAMARONES (CAB. EN SAN VICENTE)	2018-01-01	165.578417443687	2Coastal	7.38563327630121	15.9
2176	092850	25.1	828	GUAYAS	ISIDRO AYORA	2017-01-01	487.755472323231	2Coastal	7.26812212890188	15.9
3215	080168	25	899	ESMERALDAS	VUELTA LARGA	2018-01-01	73.6957819474648	2Coastal	7.65507819822963	15.9
3216	190553	20.9	2739	ZAMORA CHINCHIPE	LOS ENCUENTROS	2017-01-01	475.828042215437	3Amazonic	7.15792123361756	15.9
96	150151	23.8	3590	NAPO	AHUANO	2017-01-01	416.362591022061	3Amazonic	7.34803157910284	15.9
1137	220450	24.1	3268	ORELLANA	LORETO	2017-01-01	94.8330260817182	3Amazonic	7.64739241461511	15.8
1138	140651	19.6	2728	MORONA SANTIAGO	ASUNCION	2017-01-01	200.291557351608	3Amazonic	7.08300202805797	15.8
2177	091452	24.9	786	GUAYAS	SABANILLA	2017-01-01	319.180613389997	2Coastal	7.40866783788235	15.8
3217	110457	22.5	1171	LOJA	TNTE. MAXIMILIANO RODRIGUEZ LOAIZA	2018-01-01	34.8355119964838	1Highlands	7.50294305905618	15.8
97	160252	20.3	4089	PASTAZA	SHELL	2019-01-01	33.8650842409097	3Amazonic	7.28887701162162	15.8
98	130150	25.4	427	MANABI	PORTOVIEJO	2017-01-01	418.513122337678	2Coastal	6.84837731120262	15.8
1139	092350	25.1	1611	GUAYAS	CORONEL MARCELINO MARIDUEÑA (SAN CARLOS)	2017-01-01	254.410258523689	2Coastal	7.22789602833646	15.7
2178	030362	22.3	1935	CAÑAR	VENTURA	2020-01-01	68.3362828241788	1Highlands	7.22438124819109	15.7
2179	111453	23	1068	LOJA	MILAGROS	2018-01-01	90.7769391029227	1Highlands	7.41451032572358	15.7
3218	071450	24.6	932	EL ORO	LA VICTORIA	2018-01-01	109.171207805511	2Coastal	7.65915077767994	15.7
99	092251	25	1705	GUAYAS	CRNEL. LORENZO DE GARAICOA (PEDREGAL)	2018-01-01	163.404666948246	2Coastal	7.20960108258109	15.7
100	140652	23	2386	MORONA SANTIAGO	HUAMBI	2020-01-01	161.018963157732	3Amazonic	6.86981865966576	15.6
3219	010851	21.3	679	AZUAY	ABDON CALDERON (LA UNION)	2017-01-01	59.9393976905427	1Highlands	7.29454487596474	15.6
101	030154	15.4	805	CAÑAR	JAVIER LOYOLA (CHUQUIPATA)	2017-01-01	29.034532012323	1Highlands	6.72235851599646	15.5
102	111160	21.1	743	LOJA	SUMAYPAMBA	2017-01-01	90.9338986241777	1Highlands	7.29575653177979	15.5
103	140164	10.5	1660	MORONA SANTIAGO	RIO BLANCO	2018-01-01	454.618683540797	3Amazonic	7.03109395168358	15.5
1140	080350	25.2	1835	ESMERALDAS	MUISNE	2018-01-01	173.975605598185	2Coastal	6.75895708686518	15.5
1141	090653	25.3	1024	GUAYAS	LAUREL	2017-01-01	36.5673049938179	2Coastal	7.16301126201602	15.5
1142	131350	24.7	860	MANABI	SANTA ANA DE VUELTA LARGA	2018-01-01	315.529921875266	2Coastal	6.85134231146228	15.5
1143	140351	22	2440	MORONA SANTIAGO	INDANZA	2017-01-01	72.0040234719412	3Amazonic	6.97388027103683	15.5
2180	080450	24.9	2254	ESMERALDAS	ROSA ZARATE (QUININDE)	2017-01-01	1040.68834153866	2Coastal	6.71628255461698	15.5
2181	092250	25.1	1573	GUAYAS	SIMON BOLIVAR	2018-01-01	128.201286007236	2Coastal	7.10342992325355	15.5
2182	140151	18.3	2538	MORONA SANTIAGO	ALSHI (CAB EN 9 DE OCTUBRE)	2017-01-01	273.567431568929	3Amazonic	7.08871448117848	15.5
2183	190152	22.2	1988	ZAMORA CHINCHIPE	GUADALUPE	2017-01-01	244.10428875919	3Amazonic	7.05364109722942	15.5
3220	220150	24.7	3349	ORELLANA	PUERTO FRANCISCO DE ORELLANA (EL COCA)	2019-01-01	145.466565090009	3Amazonic	7.09831975351606	15.5
3221	110853	22.7	995	LOJA	SABIANGO (LA CAPILLA)	2018-01-01	45.3350215284337	1Highlands	7.39401457086752	15.5
3222	140156	20	2856	MORONA SANTIAGO	SAN ISIDRO	2019-01-01	128.600260146987	3Amazonic	6.81835097090345	15.5
104	160152	23.5	3918	PASTAZA	CANELOS	2018-01-01	450.369793782056	3Amazonic	7.2507903510393	15.4
105	140357	21.8	2632	MORONA SANTIAGO	STA SUSANA DE CHIVIAZA (CAB EN CHIVIAZA)	2020-01-01	283.972634389709	3Amazonic	6.91207648015177	15.4
1144	080654	25.2	932	ESMERALDAS	TONSUPA	2017-01-01	84.0807797689104	2Coastal	7.09179413516281	15.4
1145	140454	21.1	3830	MORONA SANTIAGO	SANGAY (CAB EN NAYAMANACA)	2017-01-01	195.923312425204	3Amazonic	7.17385867224256	15.4
2184	120553	25	2111	LOS RIOS	SAN CARLOS	2019-01-01	84.7890307506519	2Coastal	6.95537062505712	15.4
3223	080154	25.5	1347	ESMERALDAS	CHINCA	2020-01-01	224.17282709888	2Coastal	6.99489134063731	15.4
3224	130852	24	228	MANABI	SANTA MARIANITA (BOCA DE PACOCHE)	2017-01-01	38.4489122994528	2Coastal	8.24781184120105	15.4
106	070651	25.2	674	EL ORO	BARBONES (SUCRE)	2019-01-01	60.7037446379955	2Coastal	7.89949485393512	15.3
107	141050	22.5	2375	MORONA SANTIAGO	LOGROÑO	2019-01-01	54.9165468322772	3Amazonic	7.26306981054658	15.3
1146	071054	24.9	907	EL ORO	PIEDRAS	2018-01-01	40.3661591245501	2Coastal	7.25679887387022	15.3
2185	080254	25.9	2126	ESMERALDAS	LA TOLA	2017-01-01	151.648317840994	2Coastal	7.61473911433323	15.3
2186	111250	21.1	1096	LOJA	SOZORANGA	2017-01-01	289.178128093804	1Highlands	7.0546833207228	15.3
3225	220453	24.2	3280	ORELLANA	SAN JOSE DE PAYAMINO	2017-01-01	832.406239714398	3Amazonic	7.08375743150028	15.3
3226	130656	24.2	321	MANABI	MEMBRILLAL	2020-01-01	67.9011930391132	2Coastal	7.64690632920241	15.3
108	111450	22.6	1199	LOJA	PINDAL	2017-01-01	50.7611236755953	1Highlands	6.98870092397293	15.2
1147	030452	25.1	1588	CAÑAR	PANCHO NEGRO	2018-01-01	160.818373600372	1Highlands	6.89288122263299	15.2
2187	090350	25.3	866	GUAYAS	BALAO	2018-01-01	409.230587299935	2Coastal	6.95366250288239	15.2
3227	090750	25.6	883	GUAYAS	ELOY ALFARO (DURAN)	2018-01-01	300.556622634042	2Coastal	7.07596778777811	15.2
109	071052	24.6	1022	EL ORO	LA BOCANA	2017-01-01	61.6100249095931	2Coastal	6.95349914032849	15.1
110	140450	21.7	4065	MORONA SANTIAGO	PALORA (METZERA)	2017-01-01	123.574904805953	3Amazonic	6.94420612096613	15.1
1148	080259	24.9	2648	ESMERALDAS	SANTO DOMINGO DE ONZOLE	2017-01-01	677.218232745483	2Coastal	7.08670935864899	15.1
1149	091053	25.2	1382	GUAYAS	MARISCAL SUCRE (HUAQUES)	2018-01-01	54.8693914769173	2Coastal	7.04032369510813	15.1
1150	140751	21.6	3342	MORONA SANTIAGO	CHIGUAZA	2018-01-01	479.432151666751	3Amazonic	7.00923453658153	15.1
2188	160150	21.2	4438	PASTAZA	PUYO	2018-01-01	87.5943987843427	3Amazonic	6.62925544318082	15.1
2189	110756	21.9	787	LOJA	SACAPALCA	2017-01-01	111.013739186659	1Highlands	7.18639289586593	15.1
3228	070652	25.2	582	EL ORO	LA IBERIA	2019-01-01	13.4942398309368	2Coastal	7.80463414992759	15.1
3229	120752	25.2	2054	LOS RIOS	ZAPOTAL	2019-01-01	246.540033819759	2Coastal	6.66721207514062	15.1
111	080754	25.1	1964	ESMERALDAS	MONTALVO (CAB EN HORQUETA)	2017-01-01	377.913411655041	2Coastal	6.99076270099733	15
1151	092750	24.4	2076	GUAYAS	GRAL. ANTONIO ELIZALDE (BUCAY)	2017-01-01	153.235211827161	2Coastal	6.63628938943254	15
2190	080150	25.2	814	ESMERALDAS	ESMERALDAS	2018-01-01	67.5180727617247	2Coastal	7.61747277179096	15
2191	120351	24.3	2189	LOS RIOS	LA ESMERALDA	2017-01-01	65.9818353082315	2Coastal	6.81455648920474	15
3230	080560	26	2383	ESMERALDAS	TAMBILLO	2017-01-01	213.159180585892	2Coastal	7.4371815265545	15
112	150156	23.5	3979	NAPO	PUERTO NAPO	2017-01-01	214.648329227995	3Amazonic	6.76162725147997	14.9
113	120550	25.1	2148	LOS RIOS	QUEVEDO	2018-01-01	190.895206139925	2Coastal	6.49174276035853	14.9
1152	160166	21.7	4417	PASTAZA	EL TRIUNFO	2017-01-01	237.352667614578	3Amazonic	6.85940870048474	14.9
2192	090652	25.4	1009	GUAYAS	JUAN BAUTISTA AGUIRRE (LOS TINTOS)	2017-01-01	49.5964038571641	2Coastal	6.81973249920974	14.9
3231	080251	25.7	2709	ESMERALDAS	ANCHAYACU	2017-01-01	245.921247013163	2Coastal	7.11357629442544	14.9
3232	110852	22	934	LOJA	LA VICTORIA	2018-01-01	67.8400790143311	1Highlands	7.44043764249581	14.9
114	190752	22.3	2165	ZAMORA CHINCHIPE	TRIUNFO-DORADO	2018-01-01	53.2326964034445	3Amazonic	7.02217084651339	14.8
1153	080256	26	2425	ESMERALDAS	MALDONADO	2017-01-01	57.3876194987321	2Coastal	7.31401222707637	14.8
1154	140356	22.4	2483	MORONA SANTIAGO	SAN MIGUEL DE CONCHAY	2018-01-01	128.598596502857	3Amazonic	6.97341864240982	14.8
2193	220151	24.7	3246	ORELLANA	DAYUMA	2017-01-01	1230.80554420568	3Amazonic	7.01850819634265	14.8
3233	071453	22.9	1386	EL ORO	SAN ISIDRO	2017-01-01	29.3976277693829	2Coastal	7.05854025759234	14.8
115	110553	23.3	1421	LOJA	SANTA RUFINA	2017-01-01	54.3855070973889	1Highlands	6.89374496793929	14.7
1155	130153	25	328	MANABI	CRUCITA	2017-01-01	62.7364415399919	2Coastal	7.09025343506295	14.7
2194	070954	23.6	997	EL ORO	PROGRESO	2018-01-01	149.803172187303	2Coastal	6.89342973971709	14.7
2195	130658	23.9	345	MANABI	PUERTO DE CAYO	2017-01-01	171.397495838148	2Coastal	6.96708787648253	14.7
3234	071351	21	910	EL ORO	ABAÑIN	2017-01-01	65.0180502501171	2Coastal	6.93668062824428	14.7
3235	140557	22.2	2537	MORONA SANTIAGO	SAN FRANCISCO DE CHINIMBIMI	2019-01-01	133.48588490468	3Amazonic	6.9642354282529	14.7
1156	110253	16.7	1215	LOJA	UTUANA	2018-01-01	120.97484846881	1Highlands	7.07325301534661	14.6
116	070353	21.7	1533	EL ORO	MILAGRO	2017-01-01	3.02464444650715	2Coastal	7.2080496742065	14.6
117	240250	24.2	152	SANTA ELENA	LA LIBERTAD	2018-01-01	25.1749832232812	2Coastal	7.57714612016702	14.6
2196	190551	19.6	2366	ZAMORA CHINCHIPE	CHICAÑA	2017-01-01	267.511326898228	3Amazonic	6.67276131713919	14.6
3236	190651	22.3	2099	ZAMORA CHINCHIPE	EL GUISME	2019-01-01	94.2140278438425	3Amazonic	6.88161859365132	14.6
1157	160165	21.4	4411	PASTAZA	VERACRUZ (INDILLAMA) (CAB. EN INDILLAMA)	2018-01-01	169.44336068284	3Amazonic	6.36407241880841	14.5
1158	220159	24.7	3377	ORELLANA	NUEVO PARAISO (CAB. EN UNION )	2017-01-01	305.243516086083	3Amazonic	6.75528608351315	14.4
118	150950	21.9	4196	NAPO	CARLOS JULIO AROSEMENA TOLA	2018-01-01	501.203476750034	3Amazonic	6.30952679101443	14.4
119	240352	24.2	144	SANTA ELENA	JOSE LUIS TAMAYO (MUEY)	2018-01-01	33.9837799496728	2Coastal	7.62567958580424	14.4
2197	080252	25.6	3011	ESMERALDAS	ATAHUALPA (CAB. EN CAMARONES)	2017-01-01	246.24704439255	2Coastal	6.80037748028476	14.4
2198	090156	24.6	404	GUAYAS	POSORJA	2018-01-01	75.3183888740446	2Coastal	7.2525847632344	14.4
3237	150153	24.1	3208	NAPO	CHONTAPUNTA	2017-01-01	970.951255624739	3Amazonic	6.82430118195858	14.4
3238	092056	25.5	958	GUAYAS	VIRGEN DE FATIMA	2018-01-01	53.0273651531769	2Coastal	6.72254636170247	14.4
1159	080454	25.3	1734	ESMERALDAS	VICHE	2017-01-01	90.9626381912251	2Coastal	6.63802007459351	14.3
1160	121050	24.9	2318	LOS RIOS	SAN JACINTO DE BUENA FE	2018-01-01	415.09797007413	2Coastal	6.30065359649492	14.3
120	092150	24.2	384	GUAYAS	GENERAL VILLAMIL (PLAYAS)	2020-01-01	268.422138455769	2Coastal	6.77706444937158	14.3
2199	220451	23.5	3452	ORELLANA	AVILA (CAB. EN HUIRUNO)	2017-01-01	330.158439056227	3Amazonic	6.86910421773497	14.3
2200	140158	18.4	2607	MORONA SANTIAGO	SINAI	2017-01-01	394.488330344453	3Amazonic	6.62827951707307	14.3
3239	071451	23.5	1196	EL ORO	LA LIBERTAD	2018-01-01	82.9160380740957	2Coastal	7.12930333932623	14.3
3240	240155	24.4	682	SANTA ELENA	SIMON BOLIVAR (JULIO MORENO)	2017-01-01	573.630196005613	2Coastal	6.56534981828566	14.3
1161	180254	17	1475	TUNGURAHUA	ULBA	2018-01-01	88.06080324645	1Highlands	6.69412375012828	14.2
1162	091051	25.4	1110	GUAYAS	CHOBO	2018-01-01	42.2890517452231	2Coastal	6.77326105280546	14.2
121	080264	25.8	2668	ESMERALDAS	TIMBIRE	2017-01-01	21.9186253596308	2Coastal	7.02686680641389	14.2
122	090654	25.3	926	GUAYAS	LIMONAL	2017-01-01	48.1272814048464	2Coastal	6.64614164040106	14.2
123	140853	21.8	2450	MORONA SANTIAGO	SAN JACINTO DE WAKAMBEIS	2018-01-01	44.3335712094309	3Amazonic	6.78607588689634	14.2
2201	070653	25.2	735	EL ORO	TENDALES (CAB. EN PUERTO TENDALES)	2019-01-01	171.682399902272	2Coastal	7.03071832261768	14.2
2202	110654	21.9	927	LOJA	27 DE ABRIL (CAB. EN LA NARANJA)	2017-01-01	41.2676168106058	1Highlands	6.86820674016364	14.2
3241	090152	24.5	568	GUAYAS	JUAN GOMEZ RENDON (PROGRESO)	2018-01-01	322.752690370829	2Coastal	6.81245955740334	14.2
3242	111352	24.4	612	LOJA	GARZAREAL	2019-01-01	190.054805758104	1Highlands	6.91488633491766	14.2
1163	080558	25.8	2511	ESMERALDAS	SAN JAVIER DE CACHAVI (CAB. EN SAN JAVIER)	2017-01-01	41.7939819012811	2Coastal	7.02347313283786	14.1
1164	120155	25.2	1925	LOS RIOS	LA UNION	2018-01-01	186.710289527272	2Coastal	6.49830692068954	14.1
124	110959	23	1363	LOJA	YAMANA	2020-01-01	22.3497798151689	1Highlands	6.61136675471986	14.1
2203	091054	25.2	1340	GUAYAS	ROBERTO ASTUDILLO (CAB. EN CRUCE DE VENECIA)	2018-01-01	87.7732144770558	2Coastal	6.49033667623517	14.1
2204	190750	21.6	2331	ZAMORA CHINCHIPE	ZUMBI	2017-01-01	163.495423070032	3Amazonic	6.47377041015568	14.1
3243	110956	22.3	1612	LOJA	ORIANGA	2017-01-01	183.75337277801	1Highlands	6.50583161891223	14.1
1165	140554	23.5	2418	MORONA SANTIAGO	SAN LUIS DE EL ACHO (CAB EN EL ACHO)	2019-01-01	59.8908355151709	3Amazonic	6.55489547757493	14
125	080354	24.6	1485	ESMERALDAS	QUINGUE (OLMEDO PERDOMO FRANCO)	2018-01-01	28.0758672944357	2Coastal	7.76368182579222	14
2205	240151	24	181	SANTA ELENA	ATAHUALPA	2018-01-01	77.4800438822145	2Coastal	7.10646936874672	14
3244	080262	25.8	2751	ESMERALDAS	COLON ELOY DEL MARIA	2017-01-01	71.5651489377928	2Coastal	6.92775456518279	14
1166	110950	18.8	1061	LOJA	CATACOCHA	2017-01-01	441.328157318235	1Highlands	6.12848684225651	13.9
126	110554	21.5	1351	LOJA	AMARILLOS	2017-01-01	21.5948739462357	1Highlands	6.8646999597453	13.9
127	140258	17.8	1820	MORONA SANTIAGO	EL IDEAL	2019-01-01	98.7773763623001	3Amazonic	6.50744469206182	13.9
2206	121350	24.9	2206	LOS RIOS	QUINSALOMA	2018-01-01	282.975859114358	2Coastal	6.01642441679037	13.9
3245	091151	25.4	1237	GUAYAS	JESUS MARIA	2019-01-01	90.8797925213457	2Coastal	6.59059255258456	13.9
3246	131250	25.5	484	MANABI	ROCAFUERTE	2018-01-01	279.975836879413	2Coastal	6.20704417073568	13.9
1167	020160	23.3	2223	BOLIVAR	SAN LUIS DE PAMBIL	2020-01-01	125.707145275801	1Highlands	6.00974980960504	13.8
1168	111050	22.2	1675	LOJA	ALAMOR	2017-01-01	238.931790843548	1Highlands	6.30000440391182	13.8
128	011551	22.7	1112	AZUAY	EL CARMEN DE PIJILI	2018-01-01	370.595140970783	1Highlands	6.51550812132127	13.8
129	190950	19.3	2702	ZAMORA CHINCHIPE	PAQUISHA	2017-01-01	166.382953793443	3Amazonic	6.67713861018068	13.8
2207	220152	24.6	3318	ORELLANA	TARACOA (NUEVA ESPERANZA: YUCA)	2017-01-01	411.719561566775	3Amazonic	6.65655039316579	13.8
2208	120152	25.3	1893	LOS RIOS	CARACOL	2018-01-01	97.9172311013292	2Coastal	6.33194917944376	13.8
3247	011150	15.2	836	AZUAY	CHORDELEG	2017-01-01	16.2957361498751	1Highlands	6.35070369217795	13.8
3248	131952	24.4	285	MANABI	SALANGO	2017-01-01	89.2356521340681	2Coastal	7.05066998795482	13.8
1169	080263	25.8	3090	ESMERALDAS	SAN JOSE DE CAYAPAS	2017-01-01	120.639109410621	2Coastal	6.5648355274591	13.7
1170	140650	22.1	2306	MORONA SANTIAGO	SUCUA	2018-01-01	471.746846372294	3Amazonic	6.17162029151724	13.7
130	092050	25.5	1072	GUAYAS	SAN JACINTO DE YAGUACHI	2018-01-01	272.555823133118	2Coastal	6.30890941214937	13.7
2209	080453	25	2694	ESMERALDAS	MALIMPIA	2018-01-01	1167.7383023873	2Coastal	6.02946512524637	13.7
2210	120754	24.3	2174	LOS RIOS	LOS ANGELES	2017-01-01	49.3610216110299	2Coastal	6.31098084192699	13.7
3249	080553	25.9	2577	ESMERALDAS	CALDERON	2017-01-01	24.5610630198114	2Coastal	6.97212782640784	13.7
1171	220154	24.6	3337	ORELLANA	EL DORADO	2017-01-01	132.87201666989	3Amazonic	6.42334896295261	13.6
1172	140253	21.9	2332	MORONA SANTIAGO	BOMBOIZA	2020-01-01	683.623086596355	3Amazonic	6.05253250509295	13.6
131	160155	20.8	4397	PASTAZA	FATIMA	2017-01-01	81.8735811794712	3Amazonic	6.3966542250318	13.6
132	140162	21.7	3278	MORONA SANTIAGO	CUCHAENTZA	2019-01-01	354.426550770829	3Amazonic	6.92483300863025	13.6
2211	070953	25	641	EL ORO	LA PEAÑA	2019-01-01	16.8255364622493	2Coastal	6.63336365289331	13.6
3250	080755	25.4	1450	ESMERALDAS	ROCAFUERTE	2018-01-01	123.79427546302	2Coastal	6.69518555594567	13.6
3251	091950	25.3	1116	GUAYAS	EL SALITRE (LAS RAMAS)	2017-01-01	131.152591778773	2Coastal	5.88123174013821	13.6
1173	080651	24.9	1393	ESMERALDAS	LA UNION	2020-01-01	114.417305332275	2Coastal	5.89334308658793	13.5
1174	190451	20	1898	ZAMORA CHINCHIPE	LA PAZ	2017-01-01	319.891235347836	3Amazonic	6.44880243830745	13.5
133	080650	24.9	1146	ESMERALDAS	ATACAMES	2018-01-01	104.825032788409	2Coastal	6.57517883451502	13.5
134	120555	24.8	2330	LOS RIOS	LA ESPERANZA	2018-01-01	28.9789974492509	2Coastal	6.54072852402671	13.5
2212	080165	24.6	1169	ESMERALDAS	TABIAZO	2018-01-01	138.289250377004	2Coastal	6.38857409899197	13.5
2213	160350	21.6	4373	PASTAZA	SANTA CLARA	2017-01-01	243.480670306513	3Amazonic	6.28717892548543	13.5
3252	080253	25.9	2604	ESMERALDAS	BORBON	2017-01-01	192.443014401919	2Coastal	6.45967891562498	13.5
3253	090153	24.6	423	GUAYAS	MORRO	2018-01-01	265.025132245782	2Coastal	6.49120974157582	13.5
1175	092055	25.5	1027	GUAYAS	YAGUACHI VIEJO (CONE)	2018-01-01	108.71350294684	2Coastal	6.22030291560826	13.4
135	092053	25.4	1148	GUAYAS	GRAL. PEDRO J. MONTERO (BOLICHE)	2018-01-01	75.2837183926239	2Coastal	6.19581533336541	13.4
2214	011550	20.7	883	AZUAY	CAMILO PONCE ENRIQUEZ	2017-01-01	268.892478768855	1Highlands	6.44968291610472	13.4
2215	190550	22.1	2216	ZAMORA CHINCHIPE	YANTZAZA (YANZATZA)	2017-01-01	271.679804320245	3Amazonic	6.01860160294324	13.4
3254	070950	24.7	860	EL ORO	PASAJE	2018-01-01	131.838457770111	2Coastal	6.25888048421379	13.4
1176	140750	21.9	3618	MORONA SANTIAGO	HUAMBOYA	2018-01-01	183.821924393194	3Amazonic	6.39409006392233	13.3
136	080556	26	2467	ESMERALDAS	CONCEPCION	2017-01-01	212.08683351293	2Coastal	6.346233080738	13.3
3255	080260	25.6	2910	ESMERALDAS	SELVA ALEGRE	2017-01-01	49.2859211236652	2Coastal	6.40978062523334	13.3
1177	071250	25.2	582	EL ORO	SANTA ROSA	2018-01-01	182.438865517912	2Coastal	6.14540607304369	13.2
1178	141250	24.5	2446	MORONA SANTIAGO	SANTIAGO	2020-01-01	650.616332261286	3Amazonic	6.34325661525761	13.2
137	070152	25.2	556	EL ORO	EL RETIRO	2019-01-01	121.188416512158	2Coastal	6.49789919386569	13.2
138	091650	25.5	1072	GUAYAS	SAMBORONDON	2018-01-01	222.972067518289	2Coastal	6.08583039200139	13.2
2216	220155	25.2	3049	ORELLANA	EL EDEN	2017-01-01	864.162416922726	3Amazonic	6.77631895544064	13.2
2217	071257	24.7	863	EL ORO	BELLAMARIA	2020-01-01	110.17439700049	2Coastal	6.04822400849627	13.2
2218	080852	24.5	2645	ESMERALDAS	LA VILLEGAS	2019-01-01	57.8952923262978	2Coastal	6.24652236789431	13.2
3256	080853	24.5	2786	ESMERALDAS	PLAN PILOTO	2017-01-01	82.7326235918879	2Coastal	6.42242384047308	13.2
3257	090150	25.4	625	GUAYAS	GUAYAQUIL	2020-01-01	2429.63843988281	2Coastal	5.60336081398435	13.2
1179	220352	24.8	3328	ORELLANA	POMPEYA	2017-01-01	97.8288213552212	3Amazonic	6.55632296413202	13.1
139	160351	21.2	4450	PASTAZA	SAN JOSE	2017-01-01	69.046363270847	3Amazonic	6.2853455358742	13.1
2219	011350	11.1	1147	AZUAY	SEVILLA DE ORO	2017-01-01	64.4374471008367	1Highlands	6.50256992958379	13.1
3258	150354	22.2	4010	NAPO	SAN PABLO DE USHPAYACU	2017-01-01	152.429073317752	3Amazonic	6.37262148535367	13.1
3259	111252	19.6	1080	LOJA	TACAMOROS	2017-01-01	76.1426184490238	1Highlands	6.38601819614732	13.1
1180	080554	25.8	2551	ESMERALDAS	CARONDELET	2017-01-01	76.2031729840749	2Coastal	6.43834990653991	13
1181	140256	20.1	2212	MORONA SANTIAGO	NUEVA TARQUI	2018-01-01	34.986465363568	3Amazonic	6.34930859015068	13
140	080352	25.1	1595	ESMERALDAS	DAULE	2017-01-01	98.3437692232084	2Coastal	6.22723879143946	13
141	090551	25	1105	GUAYAS	SAN JACINTO	2017-01-01	213.540502365287	2Coastal	6.20842717105768	13
2220	220153	24.9	3186	ORELLANA	ALEJANDRO LABAKA	2017-01-01	974.768954329504	3Amazonic	6.37932425301137	13
3260	071350	22.6	1441	EL ORO	ZARUMA	2017-01-01	11.3399145286749	2Coastal	6.23939134701538	13
1182	120450	25.4	1872	LOS RIOS	PUEBLOVIEJO	2017-01-01	163.396755528423	2Coastal	5.88818925857559	12.9
142	070956	25	717	EL ORO	CAÑAQUEMADA	2019-01-01	25.1733676783002	2Coastal	6.35253764191822	12.9
143	240156	23.9	166	SANTA ELENA	SAN JOSE DE ANCON	2018-01-01	66.3031286322062	2Coastal	6.64768960931175	12.9
2221	020251	20.3	1537	BOLIVAR	SAN JOSE DEL TAMBO (TAMBOPAMBA)	2020-01-01	238.846610283148	1Highlands	5.7175290304226	12.9
2222	130851	23.5	261	MANABI	SAN LORENZO	2017-01-01	61.1579643798894	2Coastal	6.83859327280503	12.9
3261	030363	20.7	1306	CAÑAR	DUCUR	2017-01-01	87.1494449252391	1Highlands	6.14678027032042	12.9
3262	240153	24.1	438	SANTA ELENA	CHANDUY	2017-01-01	773.181382023579	2Coastal	6.05646963009123	12.9
1183	160164	20.9	4404	PASTAZA	TENIENTE HUGO ORTIZ	2017-01-01	104.63707588503	3Amazonic	5.9847248989941	12.8
1184	091153	25.5	879	GUAYAS	SANTA ROSA DE FLANDES	2019-01-01	115.60678333147	2Coastal	6.19393174448301	12.8
1185	131355	25.3	1351	MANABI	SAN PABLO (CAB EN PUEBLO NUEVO)	2017-01-01	213.033972494616	2Coastal	6.15270588922247	12.8
144	090852	25.6	1694	GUAYAS	EL ROSARIO	2017-01-01	137.551047814833	2Coastal	6.20669066019304	12.8
145	131353	24.9	1277	MANABI	LA UNION	2017-01-01	232.257587852956	2Coastal	6.16278087311829	12.8
2223	210250	23.6	2849	SUCUMBIOS	LUMBAQUI	2019-01-01	317.781116017885	3Amazonic	6.11159323758439	12.8
2224	110350	22.3	733	LOJA	CATAMAYO (LA TOMA)	2017-01-01	145.153366790519	1Highlands	5.98083755065047	12.8
2225	190652	22.2	2201	ZAMORA CHINCHIPE	PACHICUTZA	2019-01-01	125.831513154904	3Amazonic	6.10878776412974	12.8
3263	070650	25.1	716	EL ORO	EL GUABO	2019-01-01	204.236265171525	2Coastal	6.16796520743173	12.8
3264	120750	25.4	2087	LOS RIOS	VENTANAS	2019-01-01	168.209904760393	2Coastal	5.44608237061161	12.8
1186	160162	23.4	3576	PASTAZA	SIMON BOLIVAR (CAB. EN MUSHULLACTA)	2018-01-01	1021.83428057255	3Amazonic	5.86348479575596	12.7
1187	071053	22.6	1438	EL ORO	MOROMORO (CAB. EN EL VADO)	2017-01-01	85.596613799181	2Coastal	6.06319686426645	12.7
146	080358	25	1624	ESMERALDAS	SAN JOSE DE CHAMANGA	2017-01-01	146.010325591526	2Coastal	6.07345623211665	12.7
147	070955	22.9	1075	EL ORO	UZHCURRUMI	2018-01-01	30.863796267758	2Coastal	6.12467042094054	12.7
2226	220158	24.4	3232	ORELLANA	LA BELLEZA	2017-01-01	607.812895456417	3Amazonic	6.01871893733344	12.7
2227	110455	21.6	1329	LOJA	POZUL (SAN JUAN DE POZUL)	2020-01-01	79.9303058566623	1Highlands	6.03464500144266	12.7
3265	020155	13.9	1203	BOLIVAR	SALINAS	2017-01-01	469.496571079585	1Highlands	5.45221357845414	12.7
3266	030451	25.1	1683	CAÑAR	MANUEL J. CALLE	2017-01-01	37.3096467605196	1Highlands	6.24623029607921	12.7
1188	230154	24.5	2744	SANTO DOMINGO DE LOS TSACHILAS	SAN JACINTO DEL BUA	2017-01-01	204.312793876094	2Coastal	5.44038447266165	12.6
148	080753	25.6	1926	ESMERALDAS	LAGARTO	2017-01-01	212.737217794934	2Coastal	6.2242544799685	12.6
149	190352	20.9	1801	ZAMORA CHINCHIPE	NUEVO PARAISO	2017-01-01	919.458822515291	3Amazonic	6.2537768100441	12.6
2228	110957	22.1	1202	LOJA	SAN ANTONIO	2017-01-01	35.3939985658769	1Highlands	5.96894796381473	12.6
3267	050251	19.8	2368	COTOPAXI	GUASAGANDA (CAB. EN GUASAGANDA CENTRO)	2018-01-01	247.257400977651	1Highlands	5.38216523228351	12.6
3268	190254	22.8	1304	ZAMORA CHINCHIPE	LA CHONTA	2018-01-01	18.2959817445794	3Amazonic	6.97442462605174	12.6
1189	080557	25.3	3018	ESMERALDAS	MATAJE (CAB. EN SANTANDER)	2017-01-01	292.585910730837	2Coastal	6.41405970419724	12.5
1190	121051	24.4	2643	LOS RIOS	PATRICIA PILAR	2017-01-01	166.223704846938	2Coastal	5.92927009028077	12.5
1191	190251	21	1307	ZAMORA CHINCHIPE	CHITO	2017-01-01	355.603825345074	3Amazonic	6.58445804486626	12.5
150	070951	25.1	658	EL ORO	BUENAVISTA	2019-01-01	40.9876334970628	2Coastal	6.18016090756516	12.5
151	190151	22.1	1975	ZAMORA CHINCHIPE	CUMBARATZA	2017-01-01	169.481274656961	3Amazonic	5.8220781867219	12.5
2229	080559	25.5	2610	ESMERALDAS	SANTA RITA	2017-01-01	81.2539776420679	2Coastal	6.24699322719104	12.5
2230	131951	23.7	354	MANABI	MACHALILLA	2019-01-01	141.07764799553	2Coastal	5.89511514303894	12.5
3269	080752	25.1	1954	ESMERALDAS	CHUMUNDE	2018-01-01	504.149888542715	2Coastal	6.01867885107226	12.5
3270	140455	21.9	3966	MORONA SANTIAGO	16 DE AGOSTO	2018-01-01	94.030304100714	3Amazonic	6.01174692993985	12.5
1192	121150	24	2585	LOS RIOS	VALENCIA	2019-01-01	977.857667136377	2Coastal	5.37564844379194	12.4
1193	190256	22.8	1304	ZAMORA CHINCHIPE	PUCAPAMBA	2018-01-01	22.1370305402618	3Amazonic	6.8536615289307	12.4
152	111051	23.1	1480	LOJA	CIANO	2018-01-01	81.130236855388	1Highlands	6.0935462419626	12.4
153	140552	19.6	2724	MORONA SANTIAGO	CHUPIANZA	2018-01-01	100.637509319457	3Amazonic	6.03471033635062	12.4
2231	080555	25.2	2702	ESMERALDAS	5 DE JUNIO (CAB. EN UIMBI)	2017-01-01	211.725915707593	2Coastal	6.18614620035563	12.4
2232	130152	24.9	972	MANABI	ALHAJUELA (BAJO GRANDE)	2017-01-01	24.4189735982726	2Coastal	6.16071675340567	12.4
2233	190952	20.8	2584	ZAMORA CHINCHIPE	NUEVO QUITO	2018-01-01	115.806222055009	3Amazonic	6.33915852297139	12.4
3271	160450	23.4	3877	PASTAZA	ARAJUNO	2018-01-01	637.336249537413	3Amazonic	5.98418062582173	12.4
3272	131051	24.5	928	MANABI	CAMPOZANO (LA PALMA DE PAJAN)	2017-01-01	247.016046891392	2Coastal	5.94752014474073	12.4
1194	071254	25.3	632	EL ORO	SAN ANTONIO	2019-01-01	23.642641004478	2Coastal	6.20174984886528	12.3
154	071251	25.3	597	EL ORO	BELLAVISTA	2019-01-01	49.1222599567818	2Coastal	6.13688794180733	12.3
155	140551	18.5	2397	MORONA SANTIAGO	COPAL	2020-01-01	471.969201954905	3Amazonic	5.98501175326859	12.3
2234	091250	25	1602	GUAYAS	NARANJITO	2018-01-01	224.833665258736	2Coastal	5.71125040664657	12.3
3273	071151	20.9	1237	EL ORO	CURTINCAPA	2017-01-01	19.6969065766247	2Coastal	6.06959016087313	12.3
3274	110550	22.9	1448	LOJA	CHAGUARPAMBA	2017-01-01	101.382931448777	1Highlands	5.74931073340252	12.3
1195	160250	19.5	3615	PASTAZA	MERA	2017-01-01	359.897532240163	3Amazonic	5.77832953342583	12.2
1196	190350	21.8	2321	ZAMORA CHINCHIPE	GUAYZIMI	2020-01-01	184.382632000041	3Amazonic	5.82556272040059	12.2
156	131351	24.8	1031	MANABI	AYACUCHO	2017-01-01	109.463849104118	2Coastal	5.86228110795828	12.2
2235	070150	25.2	512	EL ORO	MACHALA	2020-01-01	202.428707561397	2Coastal	5.5573285526448	12.2
3275	110450	21.6	1339	LOJA	CELICA	2019-01-01	240.267918601129	1Highlands	5.51727679358782	12.2
1197	111651	20.4	987	LOJA	LA TINGUE	2017-01-01	51.4998419792928	1Highlands	5.93098014726024	12.1
157	110552	23.2	1439	LOJA	EL ROSARIO	2018-01-01	91.9117549371997	1Highlands	5.8510563017789	12.1
158	131650	23.7	911	MANABI	SUCRE	2018-01-01	196.510103099651	2Coastal	5.49141719606664	12.1
2236	080561	25.4	2756	ESMERALDAS	TULULBI (CAB. EN RICAURTE)	2017-01-01	351.91373527898	2Coastal	6.02843050504973	12.1
2237	120851	25.3	1280	LOS RIOS	ANTONIO SOTOMAYOR (CAB. EN PLAYAS DE VINCES)	2017-01-01	142.39166160993	2Coastal	5.67126281803129	12.1
3276	220160	24.1	3388	ORELLANA	SAN JOSE DE GUAYUSA	2017-01-01	458.885528077174	3Amazonic	5.883330101235	12.1
3277	130952	23.7	420	MANABI	LA PILA	2017-01-01	98.4654576176363	2Coastal	6.07999040573215	12.1
1198	080750	25.4	1121	ESMERALDAS	RIOVERDE	2019-01-01	71.8053521921063	2Coastal	5.41198646818983	12
1199	120154	25.4	1582	LOS RIOS	PIMOCHA	2019-01-01	268.670947677308	2Coastal	5.29006057853304	12
159	111353	24.1	432	LOJA	LIMONES	2019-01-01	231.682194845331	1Highlands	6.24322467970334	12
2238	091152	25.2	1392	GUAYAS	SAN CARLOS	2019-01-01	89.6725410999758	2Coastal	5.78363586754784	12
3278	091952	25.4	1171	GUAYAS	LA VICTORIA (ÑAUZA)	2018-01-01	81.5885843056987	2Coastal	5.77108471598271	12
1200	900451	24.6	1923	GUAYAS	EL PIEDRERO	2019-01-01	170.163145557469	2Coastal	5.91438752025156	11.9
1202	111055	20.6	1536	LOJA	VICENTINO	2017-01-01	56.7962620301985	1Highlands	5.81262029714358	11.9
160	220358	24.7	3368	ORELLANA	UNION MILAGREÑA	2017-01-01	137.44129627161	3Amazonic	5.86117214551672	11.9
162	110354	20.4	942	LOJA	ZAMBI	2017-01-01	49.6263674328962	1Highlands	5.85684465814628	11.9
2239	020750	24.4	2187	BOLIVAR	LAS NAVES	2018-01-01	148.694355626172	1Highlands	5.58733931717349	11.9
2240	071356	22.9	1371	EL ORO	MALVAS	2018-01-01	13.5216759897651	2Coastal	5.99362659455445	11.9
2242	140850	19.7	2422	MORONA SANTIAGO	SAN JUAN BOSCO	2017-01-01	153.723856912102	3Amazonic	5.5787218339658	11.9
3279	080562	25.3	2623	ESMERALDAS	URBINA	2017-01-01	146.170190640408	2Coastal	5.94566886420274	11.9
3280	090250	25.3	1420	GUAYAS	ALFREDO BAQUERIZO MORENO (JUJAN)	2020-01-01	218.655798677267	2Coastal	5.38547419689153	11.9
3282	190158	20.3	2122	ZAMORA CHINCHIPE	SAN CARLOS DE LAS MINAS	2017-01-01	148.836930383979	3Amazonic	5.76111779438439	11.9
1203	080550	25.9	2601	ESMERALDAS	SAN LORENZO	2017-01-01	235.842030084159	2Coastal	5.80932109129163	11.8
1204	110958	22.2	1377	LOJA	CASANGA	2017-01-01	52.319040750101	1Highlands	5.60372160867246	11.8
1205	131651	24.2	1281	MANABI	BELLAVISTA	2017-01-01	103.151947694991	2Coastal	5.68538141772893	11.8
163	080353	24.6	1413	ESMERALDAS	GALERA	2018-01-01	67.9193853416731	2Coastal	6.44486493644247	11.8
164	091450	24.8	801	GUAYAS	PEDRO CARBO	2017-01-01	515.123088065879	2Coastal	5.57766652434094	11.8
165	130151	25	817	MANABI	ABDON CALDERON (SAN FRANCISCO)	2017-01-01	124.102814886157	2Coastal	5.69846294227427	11.8
2243	080652	24.9	1331	ESMERALDAS	SUA (CAB. EN LA BOCANA)	2018-01-01	70.8938073771759	2Coastal	5.79392393246048	11.8
2244	111650	20.7	1131	LOJA	OLMEDO	2017-01-01	60.7971011583879	1Highlands	5.70797036460337	11.8
2245	140854	21.3	2586	MORONA SANTIAGO	SANTIAGO DE PANANZA	2018-01-01	88.8993121231845	3Amazonic	5.67059881461419	11.8
3283	091350	25.2	1099	GUAYAS	PALESTINA	2017-01-01	193.620143580685	2Coastal	5.62993049136054	11.8
3284	120251	25.4	1555	LOS RIOS	GUARE	2017-01-01	234.158914414575	2Coastal	5.47066346106606	11.8
3285	240152	24.5	359	SANTA ELENA	COLONCHE	2017-01-01	1150.48217463989	2Coastal	5.54153907197964	11.8
1206	900151	24.1	2927	IMBABURA	LAS GOLONDRINAS	2017-01-01	127.91810367864	1Highlands	5.60623622040267	11.7
1207	111350	24.6	457	LOJA	ZAPOTILLO	2019-01-01	194.847644757136	1Highlands	5.7431833244557	11.7
1209	240350	24.1	122	SANTA ELENA	SALINAS	2019-01-01	27.3859321328209	2Coastal	6.8939655011695	11.7
166	061050	20.2	1479	CHIMBORAZO	CUMANDA	2020-01-01	158.655458247431	1Highlands	4.98359093570316	11.7
167	110850	23.2	892	LOJA	MACARA	2018-01-01	370.918866340076	1Highlands	5.48951013165471	11.7
169	131053	24.5	1044	MANABI	GUALE	2017-01-01	114.867103999801	2Coastal	5.6800553561347	11.7
2246	011050	12.1	699	AZUAY	SAN FELIPE DE OÑA	2019-01-01	221.350635145495	1Highlands	5.68552941836092	11.7
2247	120350	25.1	1968	LOS RIOS	MONTALVO	2018-01-01	297.215701217385	2Coastal	5.36781270346935	11.7
3286	090650	25.4	860	GUAYAS	DAULE	2017-01-01	213.479868476915	2Coastal	5.30126328260242	11.7
3287	130155	25.1	537	MANABI	RIOCHICO (RIO CHICO)	2017-01-01	82.8726235858798	2Coastal	5.71373465040545	11.7
1210	110651	21.2	919	LOJA	BELLAVISTA	2017-01-01	77.3885385320502	1Highlands	5.87610933389667	11.6
1211	140851	21	2465	MORONA SANTIAGO	PAN DE AZUCAR	2018-01-01	84.2447112702531	3Amazonic	5.70910099760876	11.6
170	110451	23.1	1097	LOJA	CRUZPAMBA (CAB EN CARLOS BUSTAMANTE)	2019-01-01	26.8731122338543	1Highlands	5.97319002171074	11.6
171	140451	21.1	3736	MORONA SANTIAGO	ARAPICOS	2018-01-01	216.072748623883	3Amazonic	5.79267176681981	11.6
2249	160157	21.5	4257	PASTAZA	POMONA	2018-01-01	55.3401236157114	3Amazonic	5.63124082112077	11.6
2250	111053	23.1	1205	LOJA	EL LIMO (MARIANA DE JESUS)	2019-01-01	204.037277983773	1Highlands	5.76629857427684	11.6
3289	090656	25.2	870	GUAYAS	LOS LOJAS (ENRIQUE BAQUERIZO MORENO)	2018-01-01	118.507746761444	2Coastal	5.61264393275529	11.6
3290	111451	21.4	1506	LOJA	CHAQUINAL	2018-01-01	17.2670549247033	1Highlands	5.74101013273068	11.6
1212	010251	19.2	627	AZUAY	ASUNCION	2017-01-01	58.1469541396233	1Highlands	5.62325118927359	11.5
1213	130154	24.5	787	MANABI	PUEBLO NUEVO	2017-01-01	36.5687618747415	2Coastal	5.73821407574549	11.5
172	160154	21.1	4482	PASTAZA	DIEZ DE AGOSTO	2019-01-01	93.1479406361985	3Amazonic	5.24584649998619	11.5
173	120650	25.4	1904	LOS RIOS	CATARAMA	2020-01-01	48.6555488994827	2Coastal	5.34164656772063	11.5
2251	080153	24.1	1545	ESMERALDAS	CRNEL. CARLOS CONCHA TORRES (CAB. EN HUELE)	2018-01-01	291.354743406133	2Coastal	5.54711668444767	11.5
2252	070550	20.1	1101	EL ORO	CHILLA	2017-01-01	331.424910227917	2Coastal	5.50199646843284	11.5
3291	080351	25.1	1637	ESMERALDAS	BOLIVAR	2018-01-01	44.177540574317	2Coastal	5.85065351095255	11.5
3292	071051	22.8	1474	EL ORO	CAPIRO (CAB. EN LA CAPILLA DE CAPIRO)	2017-01-01	144.528452346036	2Coastal	5.39969999655517	11.5
1214	070254	25.5	646	EL ORO	PALMALES	2018-01-01	214.182419182979	2Coastal	5.5898768373463	11.4
1215	190252	22.6	1333	ZAMORA CHINCHIPE	EL CHORRO	2018-01-01	14.8479057002715	3Amazonic	6.30964641860742	11.4
174	070251	25.5	410	EL ORO	CHACRAS	2018-01-01	120.583130323871	2Coastal	6.00697961651787	11.4
175	111251	20.7	1131	LOJA	NUEVA FATIMA	2018-01-01	46.4490626055076	1Highlands	5.94163054370362	11.4
176	190753	21.9	2117	ZAMORA CHINCHIPE	PANGUINTZA	2018-01-01	44.7299948394641	3Amazonic	5.66529659951362	11.4
2253	210452	25.1	3059	SUCUMBIOS	PAÑACOCHA	2017-01-01	632.041019122536	3Amazonic	5.92062771951745	11.4
2254	091050	25.2	1267	GUAYAS	MILAGRO	2018-01-01	220.623621956842	2Coastal	5.28837246184359	11.4
2255	190351	21.7	2219	ZAMORA CHINCHIPE	ZURMI	2018-01-01	915.1142116519	3Amazonic	5.77224326116025	11.4
3293	220354	24.4	3550	ORELLANA	SAN SEBASTIAN DEL COCA	2017-01-01	283.234117301992	3Amazonic	5.51147332310919	11.4
3294	091451	25	976	GUAYAS	VALLE DE LA VIRGEN	2017-01-01	101.171058869567	2Coastal	5.43655549578753	11.4
3295	900351	24.9	2237	MANABI	MANGA DEL CURA	2017-01-01	482.967281139763	2Coastal	5.4412165245222	11.4
1216	080356	24.9	1647	ESMERALDAS	SAN FRANCISCO	2018-01-01	189.403984320936	2Coastal	5.89364588694166	11.3
1217	071150	23.5	1293	EL ORO	PORTOVELO	2018-01-01	38.3715372105088	2Coastal	5.4677053612009	11.3
177	160163	21.4	4348	PASTAZA	TARQUI	2018-01-01	87.8077046504646	3Amazonic	5.47225959718347	11.3
178	140553	22.7	2548	MORONA SANTIAGO	PATUCA	2019-01-01	256.357748646606	3Amazonic	5.28590464113823	11.3
2256	080451	23.7	1974	ESMERALDAS	CUBE	2017-01-01	699.472381718287	2Coastal	5.44130565685897	11.3
2257	131054	24.4	1220	MANABI	LASCANO	2017-01-01	143.954612823519	2Coastal	5.4979608598115	11.3
3296	080751	25.2	1521	ESMERALDAS	CHONTADURO	2018-01-01	216.90559204461	2Coastal	5.38368667634682	11.3
3297	131551	25.7	839	MANABI	BACHILLERO	2017-01-01	59.4133476210152	2Coastal	5.56206418587693	11.3
1218	011051	17.9	811	AZUAY	SUSUDEL	2017-01-01	72.4770169023058	1Highlands	5.54210278556197	11.2
179	150150	23.1	4257	NAPO	TENA	2019-01-01	79.5688976679178	3Amazonic	5.2344867670258	11.2
2258	091953	25.3	1112	GUAYAS	JUNQUILLAL	2017-01-01	97.6800553768206	2Coastal	5.26049093481878	11.2
3298	110254	20.1	990	LOJA	SANGUILLIN	2017-01-01	98.6719625107832	1Highlands	5.77261320638313	11.2
1219	020355	18.5	1543	BOLIVAR	TELIMBELA	2018-01-01	158.180219902111	1Highlands	5.28688811776895	11.1
1220	070750	25.4	344	EL ORO	HUAQUILLAS	2019-01-01	63.5663014742921	2Coastal	6.02211239880279	11.1
1221	131652	23.8	1163	MANABI	NOBOA	2017-01-01	146.075275117938	2Coastal	5.36865773978724	11.1
180	070250	25.5	563	EL ORO	ARENILLAS	2018-01-01	393.824110571816	2Coastal	5.23586554834265	11.1
181	130950	24.6	280	MANABI	MONTECRISTI	2017-01-01	653.759650226983	2Coastal	5.26569995609648	11.1
2259	080452	25.4	2188	ESMERALDAS	CHURA (CHANCAMA) (CAB. EN EL YERBERO)	2018-01-01	219.771983482958	2Coastal	5.44745905760544	11.1
2260	090950	25	1736	GUAYAS	EL TRIUNFO	2017-01-01	395.408451486204	2Coastal	5.01027497343295	11.1
2261	131751	24.8	1564	MANABI	COJIMIES	2017-01-01	736.938011931452	2Coastal	5.40402380184996	11.1
3299	220356	24.4	3620	ORELLANA	RUMIPAMBA	2017-01-01	72.9151103115867	3Amazonic	5.7361523882998	11.1
3300	091154	25.5	1014	GUAYAS	TAURA	2019-01-01	918.78851925035	2Coastal	5.28645190626555	11.1
3301	140550	17.2	2577	MORONA SANTIAGO	SANTIAGO DE MENDEZ	2017-01-01	299.790987693705	3Amazonic	5.2940464170699	11.1
1222	220161	24.6	3338	ORELLANA	SAN LUIS DE ARMENIA	2018-01-01	318.35318165115	3Amazonic	5.40691160302801	11
1223	131552	25.5	751	MANABI	ANGEL PEDRO GILER (LA ESTANCILLA)	2017-01-01	67.1902646216515	2Coastal	5.4110762806251	11
182	220156	24.6	3303	ORELLANA	GARCIA MORENO	2020-01-01	129.227232959441	3Amazonic	5.34507090625108	11
183	130350	24.3	1638	MANABI	CHONE	2017-01-01	829.255693772555	2Coastal	4.94502086464511	11
2262	092550	25.3	789	GUAYAS	NARCISA DE JESUS	2018-01-01	136.813246493227	2Coastal	5.34557634332745	11
3302	111052	21.8	1604	LOJA	EL ARENAL	2018-01-01	28.6077505638886	1Highlands	5.6120013131398	11
1224	220454	24.2	3196	ORELLANA	SAN JOSE DE DAHUANO	2018-01-01	501.216047403402	3Amazonic	5.4322573939107	10.9
1225	111453	23	1068	LOJA	MILAGROS	2019-01-01	90.7769391029227	1Highlands	5.48413063266719	10.9
184	220452	24.4	3231	ORELLANA	PUERTO MURIALDO	2018-01-01	193.32766552957	3Amazonic	5.37635026580659	10.9
185	110655	20.3	940	LOJA	EL INGENIO	2017-01-01	72.3992344005106	1Highlands	5.43902726233137	10.9
2263	160251	21.5	4204	PASTAZA	MADRE TIERRA	2018-01-01	132.171184520285	3Amazonic	5.30434677742397	10.9
2264	010652	19.2	760	AZUAY	SAN RAFAEL DE SHARUG	2017-01-01	69.2411083570364	1Highlands	5.81905412143208	10.9
2265	120452	25.4	1687	LOS RIOS	SAN JUAN	2018-01-01	90.9658969311553	2Coastal	5.2498330735836	10.9
3303	210451	24.8	3255	SUCUMBIOS	LIMONCOCHA	2017-01-01	598.602283597536	3Amazonic	5.46745903799542	10.9
3304	071153	20.4	1078	EL ORO	SALATI	2017-01-01	150.177235556719	2Coastal	5.33904763602261	10.9
3305	080265	25.8	2148	ESMERALDAS	SANTA LUCIA DE LAS PEÑAS	2017-01-01	90.6113109348044	2Coastal	5.4464938378093	10.9
1226	150155	22.5	3956	NAPO	PUERTO MISAHUALLI	2017-01-01	347.934013741242	3Amazonic	5.14775380399958	10.8
1227	091850	25.3	952	GUAYAS	SANTA LUCIA	2017-01-01	357.863164355174	2Coastal	5.05235354934729	10.8
1228	120753	22.7	1933	LOS RIOS	CHACARITA	2017-01-01	67.1980965333639	2Coastal	5.29584020773721	10.8
186	080653	25	1392	ESMERALDAS	TONCHIGUE	2018-01-01	134.251527814466	2Coastal	5.47929223666156	10.8
187	071452	23.3	1343	EL ORO	EL PARAISO	2018-01-01	77.354373709426	2Coastal	5.27713916464897	10.8
188	080850	24.5	2751	ESMERALDAS	LA CONCORDIA	2017-01-01	81.3682817434316	2Coastal	4.91515505085849	10.8
2266	220357	24.5	3627	ORELLANA	TRES DE NOVIEMBRE	2017-01-01	124.079851226756	3Amazonic	5.49600493231967	10.8
2267	130654	23.2	1136	MANABI	LA UNION	2017-01-01	46.6807386143927	2Coastal	5.41725326953398	10.8
3306	070355	22.6	1273	EL ORO	SAN JUAN DE CERRO AZUL	2018-01-01	93.906814342567	2Coastal	5.32959972107194	10.8
3307	141051	22.7	2663	MORONA SANTIAGO	YAUPI	2020-01-01	854.749447346612	3Amazonic	5.35497440624901	10.8
1229	030451	25.1	1683	CAÑAR	MANUEL J. CALLE	2018-01-01	37.3096467605196	1Highlands	5.38728839691785	10.7
1230	140255	19.8	2228	MORONA SANTIAGO	EL ROSARIO	2018-01-01	97.286701314795	3Amazonic	5.24728579689962	10.7
189	010157	16.9	782	AZUAY	MOLLETURO	2018-01-01	977.081212636694	1Highlands	5.11451119110215	10.7
190	120553	25	2111	LOS RIOS	SAN CARLOS	2020-01-01	84.7890307506519	2Coastal	5.1485415848856	10.7
2268	080159	24.4	1805	ESMERALDAS	MAJUA	2018-01-01	130.903687114182	2Coastal	5.28014722698241	10.7
2269	070652	25.2	582	EL ORO	LA IBERIA	2020-01-01	13.4942398309368	2Coastal	5.93509819538225	10.7
2270	190450	20.3	1748	ZAMORA CHINCHIPE	28 DE MAYO (SAN JOSE DE YACUAMBI)	2018-01-01	483.949728734233	3Amazonic	5.10943775361107	10.7
3308	080261	23.8	2562	ESMERALDAS	TELEMBI	2017-01-01	1282.06525610084	2Coastal	5.22241772809622	10.7
3309	110456	23.5	829	LOJA	SABANILLA	2019-01-01	139.698580007999	1Highlands	5.21683863012641	10.7
3310	140353	22.7	2592	MORONA SANTIAGO	SAN ANTONIO (CAB EN SAN ANTONIO CENTRO)	2019-01-01	803.804172857082	3Amazonic	5.17690686241999	10.7
1231	110252	20	1002	LOJA	EL LUCERO	2017-01-01	51.6081565089018	1Highlands	5.49891846455556	10.6
1233	130652	23.2	920	MANABI	EL ANEGADO (CAB. EN ELOY ALFARO)	2017-01-01	117.141432248432	2Coastal	5.33082071803786	10.6
191	071253	24.9	787	EL ORO	LA AVANZADA	2019-01-01	65.7843633764011	2Coastal	5.3353918529843	10.6
193	120651	25.2	2081	LOS RIOS	RICAURTE	2018-01-01	329.843508090791	2Coastal	4.99209546108256	10.6
194	190951	19.7	2747	ZAMORA CHINCHIPE	BELLAVISTA	2018-01-01	57.0164641222034	3Amazonic	5.61582033633158	10.6
2271	111355	23.3	749	LOJA	BOLASPAMBA	2019-01-01	131.527571380619	1Highlands	5.42381370162868	10.6
2273	131950	23.1	419	MANABI	PUERTO LOPEZ	2017-01-01	200.465738482838	2Coastal	5.3816881307489	10.6
3311	111452	23.1	1225	LOJA	12 DE DICIEMBRE (CAB. EN ACHIOTES)	2019-01-01	43.5331879357359	1Highlands	5.28931623985112	10.6
3313	140250	19.8	2603	MORONA SANTIAGO	GUALAQUIZA	2017-01-01	381.407107869815	3Amazonic	4.91474084404418	10.6
1234	080152	24.8	1021	ESMERALDAS	CAMARONES (CAB. EN SAN VICENTE)	2019-01-01	165.578417443687	2Coastal	5.19628010451059	10.5
1235	070654	23.9	1051	EL ORO	RIO BONITO	2019-01-01	153.487102261493	2Coastal	5.27471587741364	10.5
1236	091651	25.5	1012	GUAYAS	TARIFA	2020-01-01	136.091861684394	2Coastal	4.96234191890697	10.5
1237	131352	24.5	1346	MANABI	HONORATO VASQUEZ (CAB EN VASQUEZ)	2017-01-01	156.606571996521	2Coastal	5.27848699458976	10.5
1238	240351	24	141	SANTA ELENA	ANCONCITO	2019-01-01	8.93608157738588	2Coastal	6.23541352407099	10.5
195	070255	25.4	574	EL ORO	CARCABON	2019-01-01	77.9800849570348	2Coastal	5.48273722026295	10.5
196	071357	22.5	1411	EL ORO	MULUNCAY GRANDE	2018-01-01	7.03578568383687	2Coastal	5.34149835472363	10.5
197	131150	25.2	1698	MANABI	PICHINCHA	2017-01-01	505.5988319158	2Coastal	5.07854814106869	10.5
198	140651	19.6	2728	MORONA SANTIAGO	ASUNCION	2018-01-01	200.291557351608	3Amazonic	4.94269177791298	10.5
2274	180252	16.5	1529	TUNGURAHUA	RIO NEGRO	2018-01-01	628.339063257303	1Highlands	5.03154120930872	10.5
2275	071055	22.5	1497	EL ORO	SAN ROQUE (AMBROSIO MALDONADO)	2017-01-01	45.6344130305087	2Coastal	5.29291607873689	10.5
2276	110851	20.6	1181	LOJA	LARAMA	2018-01-01	93.3840479950929	1Highlands	5.34296797952992	10.5
2277	131653	24.4	1211	MANABI	ARQ. SIXTO DURAN BALLEN	2017-01-01	79.959439770993	2Coastal	5.17604144034682	10.5
3314	220150	24.7	3349	ORELLANA	PUERTO FRANCISCO DE ORELLANA (EL COCA)	2020-01-01	145.466565090009	3Amazonic	5.11296558629556	10.5
3315	071255	23.9	1139	EL ORO	TORATA	2018-01-01	65.3526655272154	2Coastal	5.1854395411843	10.5
3316	111351	23	728	LOJA	MANGAHURCO	2019-01-01	171.993532064061	1Highlands	5.64421543486989	10.5
3317	140156	20	2856	MORONA SANTIAGO	SAN ISIDRO	2020-01-01	128.600260146987	3Amazonic	4.83897338928563	10.5
1239	210453	25	3248	SUCUMBIOS	SAN ROQUE (CAB. EN SAN VICENTE)	2017-01-01	644.191982242226	3Amazonic	5.47280044635781	10.4
1240	140452	18.6	2677	MORONA SANTIAGO	CUMANDA (CAB EN COLONIA AGRICOLA SEVILLA DEL ORO)	2017-01-01	824.332480141955	3Amazonic	5.03605290253276	10.4
199	150151	23.8	3590	NAPO	AHUANO	2018-01-01	416.362591022061	3Amazonic	5.12845773555288	10.4
200	120451	25.4	1991	LOS RIOS	PUERTO PECHICHE	2018-01-01	81.1668096842774	2Coastal	5.05887327251372	10.4
2278	080258	25.7	2814	ESMERALDAS	SAN FRANCISCO DE ONZOLE	2018-01-01	165.254993903695	2Coastal	5.27432028695506	10.4
2279	220355	24.5	3570	ORELLANA	LAGO SAN PEDRO	2017-01-01	75.8923672222981	3Amazonic	5.32768890354712	10.4
2280	141052	19.8	3193	MORONA SANTIAGO	SHIMPIS	2019-01-01	259.627427493573	3Amazonic	5.40822110025049	10.4
3318	080357	24.9	1761	ESMERALDAS	SAN GREGORIO	2017-01-01	448.658822290396	2Coastal	4.83585951626015	10.4
3319	092850	25.1	828	GUAYAS	ISIDRO AYORA	2018-01-01	487.755472323231	2Coastal	5.06205894319869	10.4
3320	190553	20.9	2739	ZAMORA CHINCHIPE	LOS ENCUENTROS	2018-01-01	475.828042215437	3Amazonic	4.96888431042811	10.4
1241	080355	25.1	1491	ESMERALDAS	SALIMA	2018-01-01	43.4471484165439	2Coastal	5.62804022396019	10.3
1242	092251	25	1705	GUAYAS	CRNEL. LORENZO DE GARAICOA (PEDREGAL)	2019-01-01	163.404666948246	2Coastal	5.04682974341295	10.3
1243	131450	24.5	512	MANABI	BAHIA DE CARAQUEZ	2019-01-01	183.285277696096	2Coastal	5.03024248548718	10.3
201	080168	25	899	ESMERALDAS	VUELTA LARGA	2019-01-01	73.6957819474648	2Coastal	5.3628160431039	10.3
202	010851	21.3	679	AZUAY	ABDON CALDERON (LA UNION)	2018-01-01	59.9393976905427	1Highlands	5.141304971585	10.3
203	130651	22.7	962	MANABI	AMERICA	2017-01-01	78.104162989491	2Coastal	5.29107463554947	10.3
2281	080450	24.9	2254	ESMERALDAS	ROSA ZARATE (QUININDE)	2018-01-01	1040.68834153866	2Coastal	4.63232362525073	10.3
2282	111054	19.2	1418	LOJA	MERCADILLO	2017-01-01	27.910585666319	1Highlands	5.30447069522193	10.3
2283	140358	16.7	1932	MORONA SANTIAGO	YUNGANZA (CAB EN EL ROSARIO)	2017-01-01	223.781702205291	3Amazonic	5.07882071952771	10.3
3321	160252	20.3	4089	PASTAZA	SHELL	2020-01-01	33.8650842409097	3Amazonic	5.12119126010646	10.3
3322	130251	24.8	1541	MANABI	MEMBRILLO	2017-01-01	121.204960511822	2Coastal	5.32727973509651	10.3
3323	240150	24	230	SANTA ELENA	SANTA ELENA	2018-01-01	537.729670052373	2Coastal	5.20407081360535	10.3
1244	080350	25.2	1835	ESMERALDAS	MUISNE	2019-01-01	173.975605598185	2Coastal	4.68065248599738	10.2
1245	110457	22.5	1171	LOJA	TNTE. MAXIMILIANO RODRIGUEZ LOAIZA	2019-01-01	34.8355119964838	1Highlands	5.23100300073875	10.2
204	020650	21.9	1919	BOLIVAR	CALUMA	2017-01-01	176.818939703829	1Highlands	4.48634480821659	10.2
205	220450	24.1	3268	ORELLANA	LORETO	2018-01-01	94.8330260817182	3Amazonic	5.33691227440542	10.2
206	140151	18.3	2538	MORONA SANTIAGO	ALSHI (CAB EN 9 DE OCTUBRE)	2018-01-01	273.567431568929	3Amazonic	4.94623244153566	10.2
2284	210651	24.2	3090	SUCUMBIOS	SANTA ROSA DE SUCUMBIOS	2017-01-01	54.2168969368234	3Amazonic	5.44316262703195	10.2
2285	110551	22.5	1495	LOJA	BUENAVISTA	2018-01-01	44.3318836917623	1Highlands	5.02788132215823	10.2
3324	220353	24.7	3397	ORELLANA	SAN CARLOS	2019-01-01	134.333983576004	3Amazonic	4.89563169809868	10.2
3325	130150	25.4	427	MANABI	PORTOVIEJO	2018-01-01	418.513122337678	2Coastal	4.58743935178684	10.2
1246	160150	21.2	4438	PASTAZA	PUYO	2019-01-01	87.5943987843427	3Amazonic	4.63655814300028	10.1
1247	091053	25.2	1382	GUAYAS	MARISCAL SUCRE (HUAQUES)	2019-01-01	54.8693914769173	2Coastal	5.02858979305001	10.1
1248	140164	10.5	1660	MORONA SANTIAGO	RIO BLANCO	2019-01-01	454.618683540797	3Amazonic	4.91638068562797	10.1
207	090653	25.3	1024	GUAYAS	LAUREL	2018-01-01	36.5673049938179	2Coastal	4.98434523118357	10.1
208	120950	25.5	1588	LOS RIOS	PALENQUE	2017-01-01	579.757127169424	2Coastal	4.91366897216243	10.1
2286	210350	25.4	3052	SUCUMBIOS	PUERTO EL CARMEN DEL PUTUMAYO	2017-01-01	1196.32500549894	3Amazonic	5.68830223456386	10.1
2287	111160	21.1	743	LOJA	SUMAYPAMBA	2018-01-01	90.9338986241777	1Highlands	5.08979393348205	10.1
2288	141050	22.5	2375	MORONA SANTIAGO	LOGROÑO	2020-01-01	54.9165468322772	3Amazonic	5.20016906335335	10.1
3326	210352	25.3	3150	SUCUMBIOS	PUERTO BOLIVAR (PUERTO MONTUFAR)	2017-01-01	375.354828441766	3Amazonic	5.71237320157917	10.1
3327	120752	25.2	2054	LOS RIOS	ZAPOTAL	2020-01-01	246.540033819759	2Coastal	4.70446591462821	10.1
3328	190152	22.2	1988	ZAMORA CHINCHIPE	GUADALUPE	2018-01-01	244.10428875919	3Amazonic	4.88748225087778	10.1
1249	210454	24.6	3611	SUCUMBIOS	SAN PEDRO DE LOS COFANES	2017-01-01	71.3382455701556	3Amazonic	5.17018929569237	10
1250	110853	22.7	995	LOJA	SABIANGO (LA CAPILLA)	2019-01-01	45.3350215284337	1Highlands	5.16770878788796	10
1251	132150	25.2	267	MANABI	JARAMIJO	2017-01-01	97.3014686080113	2Coastal	5.16203933025594	10
209	160152	23.5	3918	PASTAZA	CANELOS	2019-01-01	450.369793782056	3Amazonic	5.07913278843165	10
210	092250	25.1	1573	GUAYAS	SIMON BOLIVAR	2019-01-01	128.201286007236	2Coastal	4.93024400447741	10
211	131453	24.5	455	MANABI	CHARAPOTO	2017-01-01	215.747586483596	2Coastal	5.05501976344341	10
212	140454	21.1	3830	MORONA SANTIAGO	SANGAY (CAB EN NAYAMANACA)	2018-01-01	195.923312425204	3Amazonic	4.9860161343568	10
2289	071450	24.6	932	EL ORO	LA VICTORIA	2019-01-01	109.171207805511	2Coastal	5.30044319941725	10
2290	111250	21.1	1096	LOJA	SOZORANGA	2018-01-01	289.178128093804	1Highlands	4.90771519249239	10
2291	140150	21.1	2650	MORONA SANTIAGO	MACAS	2019-01-01	53.5170435768361	3Amazonic	4.94018928081906	10
3329	091452	24.9	786	GUAYAS	SABANILLA	2018-01-01	319.180613389997	2Coastal	5.07265392050457	10
3330	120550	25.1	2148	LOS RIOS	QUEVEDO	2019-01-01	190.895206139925	2Coastal	4.55029371762497	10
3331	140450	21.7	4065	MORONA SANTIAGO	PALORA (METZERA)	2018-01-01	123.574904805953	3Amazonic	4.89226162998945	10
1252	210157	24.4	3080	SUCUMBIOS	JAMBELI	2017-01-01	444.417418386517	3Amazonic	5.15742307994313	9.9
1253	090750	25.6	883	GUAYAS	ELOY ALFARO (DURAN)	2019-01-01	300.556622634042	2Coastal	4.96305049838271	9.9
213	070352	18.2	1085	EL ORO	CORDONCILLO	2019-01-01	30.8343395679013	2Coastal	5.18780924760727	9.9
214	120351	24.3	2189	LOS RIOS	LA ESMERALDA	2018-01-01	65.9818353082315	2Coastal	4.75494622782878	9.9
2292	220453	24.2	3280	ORELLANA	SAN JOSE DE PAYAMINO	2018-01-01	832.406239714398	3Amazonic	4.93602316598687	9.9
2293	130157	24	1239	MANABI	CHIRIJOS	2017-01-01	76.5646736932384	2Coastal	5.07747659623568	9.9
3332	030451	25.1	1683	CAÑAR	MANUEL J. CALLE	2019-01-01	37.3096467605196	1Highlands	5.04474119382588	9.9
3333	131151	24.7	1820	MANABI	BARRAGANETE	2017-01-01	427.51775443148	2Coastal	5.05097598246878	9.9
1254	080254	25.9	2126	ESMERALDAS	LA TOLA	2018-01-01	151.648317840994	2Coastal	5.3104449786325	9.8
1255	070651	25.2	674	EL ORO	BARBONES (SUCRE)	2020-01-01	60.7037446379955	2Coastal	5.53129574796824	9.8
1256	131350	24.7	860	MANABI	SANTA ANA DE VUELTA LARGA	2019-01-01	315.529921875266	2Coastal	4.61769004476193	9.8
1257	080851	24.7	2335	ESMERALDAS	MONTERREY	2017-01-01	102.302324622777	2Coastal	4.85459955470309	9.8
215	030450	24.9	1809	CAÑAR	LA TRONCAL	2017-01-01	120.765937549165	1Highlands	4.8683848721341	9.8
216	110951	19.2	1269	LOJA	CANGONAMA	2017-01-01	44.0318682175691	1Highlands	4.97860709519431	9.8
217	140852	16.8	2459	MORONA SANTIAGO	SAN CARLOS DE LIMON	2017-01-01	677.83978045083	3Amazonic	4.97375847738262	9.8
2294	080259	24.9	2648	ESMERALDAS	SANTO DOMINGO DE ONZOLE	2018-01-01	677.218232745483	2Coastal	4.94479216941578	9.8
2295	090350	25.3	866	GUAYAS	BALAO	2019-01-01	409.230587299935	2Coastal	4.83336801217013	9.8
2296	140351	22	2440	MORONA SANTIAGO	INDANZA	2018-01-01	72.0040234719412	3Amazonic	4.72504484479467	9.8
3334	080754	25.1	1964	ESMERALDAS	MONTALVO (CAB EN HORQUETA)	2018-01-01	377.913411655041	2Coastal	4.88178359941192	9.8
3335	110351	20.7	791	LOJA	EL TAMBO	2017-01-01	204.394892349932	1Highlands	4.86508923297076	9.8
3336	140751	21.6	3342	MORONA SANTIAGO	CHIGUAZA	2019-01-01	479.432151666751	3Amazonic	4.91127612977088	9.8
1258	071054	24.9	907	EL ORO	PIEDRAS	2019-01-01	40.3661591245501	2Coastal	4.97929448603514	9.7
218	170850	23.1	3715	PICHINCHA	PEDRO VICENTE MALDONADO	2017-01-01	623.110789207164	1Highlands	4.43899810031332	9.7
219	140356	22.4	2483	MORONA SANTIAGO	SAN MIGUEL DE CONCHAY	2019-01-01	128.598596502857	3Amazonic	4.90662652015908	9.7
2297	150156	23.5	3979	NAPO	PUERTO NAPO	2018-01-01	214.648329227995	3Amazonic	4.67768228775198	9.7
2298	090652	25.4	1009	GUAYAS	JUAN BAUTISTA AGUIRRE (LOS TINTOS)	2018-01-01	49.5964038571641	2Coastal	4.73992648989393	9.7
3337	160166	21.7	4417	PASTAZA	EL TRIUNFO	2018-01-01	237.352667614578	3Amazonic	4.75356964538649	9.7
3338	130852	24	228	MANABI	SANTA MARIANITA (BOCA DE PACOCHE)	2018-01-01	38.4489122994528	2Coastal	5.74216480800974	9.7
1259	080150	25.2	814	ESMERALDAS	ESMERALDAS	2019-01-01	67.5180727617247	2Coastal	5.34759322367225	9.6
1260	140557	22.2	2537	MORONA SANTIAGO	SAN FRANCISCO DE CHINIMBIMI	2020-01-01	133.48588490468	3Amazonic	4.92584271608931	9.6
220	092350	25.1	1611	GUAYAS	CORONEL MARCELINO MARIDUEÑA (SAN CARLOS)	2018-01-01	254.410258523689	2Coastal	4.7641789278846	9.6
221	190752	22.3	2165	ZAMORA CHINCHIPE	TRIUNFO-DORADO	2019-01-01	53.2326964034445	3Amazonic	4.9272336502687	9.6
2299	080251	25.7	2709	ESMERALDAS	ANCHAYACU	2018-01-01	245.921247013163	2Coastal	4.9631750205162	9.6
2300	190551	19.6	2366	ZAMORA CHINCHIPE	CHICAÑA	2018-01-01	267.511326898228	3Amazonic	4.64373459691321	9.6
3339	210354	25.1	3587	SUCUMBIOS	SANTA ELENA	2017-01-01	515.229428903159	3Amazonic	5.42178906637957	9.6
3340	190651	22.3	2099	ZAMORA CHINCHIPE	EL GUISME	2020-01-01	94.2140278438425	3Amazonic	4.90459552053197	9.6
1261	080256	26	2425	ESMERALDAS	MALDONADO	2018-01-01	57.3876194987321	2Coastal	5.09199073953489	9.5
1262	030154	15.4	805	CAÑAR	JAVIER LOYOLA (CHUQUIPATA)	2018-01-01	29.034532012323	1Highlands	4.30121122233637	9.5
1263	092056	25.5	958	GUAYAS	VIRGEN DE FATIMA	2019-01-01	53.0273651531769	2Coastal	4.77871528578921	9.5
1264	110852	22	934	LOJA	LA VICTORIA	2019-01-01	67.8400790143311	1Highlands	5.22090257717458	9.5
1265	131052	22.7	823	MANABI	CASCOL	2017-01-01	430.049698854009	2Coastal	4.8303689495963	9.5
222	220151	24.7	3246	ORELLANA	DAYUMA	2018-01-01	1230.80554420568	3Amazonic	4.89084657136158	9.5
223	071351	21	910	EL ORO	ABAÑIN	2018-01-01	65.0180502501171	2Coastal	4.83487616704581	9.5
224	110756	21.9	787	LOJA	SACAPALCA	2018-01-01	111.013739186659	1Highlands	4.91681212022773	9.5
225	131050	23.7	925	MANABI	PAJAN	2017-01-01	153.802662105994	2Coastal	4.6896826747433	9.5
226	240154	24.2	356	SANTA ELENA	MANGLARALTO	2017-01-01	425.40199767637	2Coastal	4.66964775769317	9.5
2301	080560	26	2383	ESMERALDAS	TAMBILLO	2018-01-01	213.159180585892	2Coastal	5.16582672707963	9.5
2302	070952	24.4	935	EL ORO	CASACAY	2019-01-01	60.5882962057169	2Coastal	4.92747557428939	9.5
2303	110251	18.2	1233	LOJA	COLAISACA	2017-01-01	195.767162204494	1Highlands	4.89631612791082	9.5
2304	111157	18.6	676	LOJA	SAN SEBASTIAN DE YULUC	2017-01-01	115.508036604449	1Highlands	4.88744629009179	9.5
2305	131250	25.5	484	MANABI	ROCAFUERTE	2019-01-01	279.975836879413	2Coastal	4.47263164827191	9.5
3341	150950	21.9	4196	NAPO	CARLOS JULIO AROSEMENA TOLA	2019-01-01	501.203476750034	3Amazonic	4.38748383288706	9.5
3342	071050	21.9	1538	EL ORO	PIÑAS	2017-01-01	121.740753007581	2Coastal	4.6119190424835	9.5
3343	110352	19.4	1048	LOJA	GUAYQUICHUMA	2017-01-01	105.971847355435	1Highlands	4.83774594891811	9.5
3344	130650	23.3	652	MANABI	JIPIJAPA	2017-01-01	398.867227625326	2Coastal	4.59851432899561	9.5
3345	131850	24.6	1358	MANABI	OLMEDO	2017-01-01	253.641831873112	2Coastal	4.59419199677164	9.5
1266	220351	24.6	3546	ORELLANA	ENOKANQUI	2017-01-01	75.6458968931888	3Amazonic	4.80695258929304	9.4
1267	071451	23.5	1196	EL ORO	LA LIBERTAD	2019-01-01	82.9160380740957	2Coastal	5.09689555584608	9.4
227	070954	23.6	997	EL ORO	PROGRESO	2019-01-01	149.803172187303	2Coastal	4.75950126235066	9.4
228	240155	24.4	682	SANTA ELENA	SIMON BOLIVAR (JULIO MORENO)	2018-01-01	573.630196005613	2Coastal	4.59951952455302	9.4
2306	230153	24.2	2735	SANTO DOMINGO DE LOS TSACHILAS	LUZ DE AMERICA	2017-01-01	310.740162039313	2Coastal	4.65877618421134	9.4
2307	130658	23.9	345	MANABI	PUERTO DE CAYO	2018-01-01	171.397495838148	2Coastal	4.85709226244418	9.4
3346	080654	25.2	932	ESMERALDAS	TONSUPA	2018-01-01	84.0807797689104	2Coastal	4.69992583009268	9.4
3347	140554	23.5	2418	MORONA SANTIAGO	SAN LUIS DE EL ACHO (CAB EN EL ACHO)	2020-01-01	59.8908355151709	3Amazonic	4.73791260546423	9.4
1268	080252	25.6	3011	ESMERALDAS	ATAHUALPA (CAB. EN CAMARONES)	2018-01-01	246.24704439255	2Coastal	4.74438840751688	9.3
1269	110253	16.7	1215	LOJA	UTUANA	2019-01-01	120.97484846881	1Highlands	4.90740896945403	9.3
1270	190156	19.2	1801	ZAMORA CHINCHIPE	TIMBARA	2017-01-01	127.957615571441	3Amazonic	4.87075279075794	9.3
229	180254	17	1475	TUNGURAHUA	ULBA	2019-01-01	88.06080324645	1Highlands	4.75248425237062	9.3
230	130657	22.6	744	MANABI	PEDRO PABLO GOMEZ	2017-01-01	284.322467004032	2Coastal	4.74900024708842	9.3
2308	150153	24.1	3208	NAPO	CHONTAPUNTA	2018-01-01	970.951255624739	3Amazonic	4.75509140790906	9.3
2309	121050	24.9	2318	LOS RIOS	SAN JACINTO DE BUENA FE	2019-01-01	415.09797007413	2Coastal	4.34091471563877	9.3
2310	240352	24.2	144	SANTA ELENA	JOSE LUIS TAMAYO (MUEY)	2019-01-01	33.9837799496728	2Coastal	5.39620039707812	9.3
3348	160165	21.4	4411	PASTAZA	VERACRUZ (INDILLAMA) (CAB. EN INDILLAMA)	2019-01-01	169.44336068284	3Amazonic	4.31282076862295	9.3
3349	121350	24.9	2206	LOS RIOS	QUINSALOMA	2019-01-01	282.975859114358	2Coastal	4.21220322249625	9.3
3350	240250	24.2	152	SANTA ELENA	LA LIBERTAD	2019-01-01	25.1749832232812	2Coastal	5.29137761823475	9.3
1271	210252	22.4	3546	SUCUMBIOS	GONZALO PIZARRO	2017-01-01	238.241542422549	3Amazonic	4.69384619393541	9.2
1272	090654	25.3	926	GUAYAS	LIMONAL	2018-01-01	48.1272814048464	2Coastal	4.63248350863274	9.2
1273	130850	24.3	249	MANABI	MANTA	2017-01-01	192.624190545434	2Coastal	4.73394774682287	9.2
231	080454	25.3	1734	ESMERALDAS	VICHE	2018-01-01	90.9626381912251	2Coastal	4.59314526304476	9.2
2311	210455	24.7	3546	SUCUMBIOS	SIETE DE JULIO	2017-01-01	123.655439713414	3Amazonic	4.77336756974061	9.2
2312	110353	19.5	900	LOJA	SAN PEDRO DE LA BENDITA	2017-01-01	148.027955828194	1Highlands	4.65542468254247	9.2
2313	140158	18.4	2607	MORONA SANTIAGO	SINAI	2018-01-01	394.488330344453	3Amazonic	4.61393361792471	9.2
232	220451	23.5	3452	ORELLANA	AVILA (CAB. EN HUIRUNO)	2018-01-01	330.158439056227	3Amazonic	4.78253282253405	9.2
233	120155	25.2	1925	LOS RIOS	LA UNION	2019-01-01	186.710289527272	2Coastal	4.55112224050624	9.2
234	140853	21.8	2450	MORONA SANTIAGO	SAN JACINTO DE WAKAMBEIS	2019-01-01	44.3335712094309	3Amazonic	4.76840119879999	9.2
3351	220159	24.7	3377	ORELLANA	NUEVO PARAISO (CAB. EN UNION )	2018-01-01	305.243516086083	3Amazonic	4.6807638705562	9.2
3352	111352	24.4	612	LOJA	GARZAREAL	2020-01-01	190.054805758104	1Highlands	4.89891202331831	9.2
3353	140258	17.8	1820	MORONA SANTIAGO	EL IDEAL	2020-01-01	98.7773763623001	3Amazonic	4.66653971139818	9.2
1274	080453	25	2694	ESMERALDAS	MALIMPIA	2019-01-01	1167.7383023873	2Coastal	4.20535150309739	9.1
1275	110654	21.9	927	LOJA	27 DE ABRIL (CAB. EN LA NARANJA)	2018-01-01	41.2676168106058	1Highlands	4.7790310827321	9.1
1276	120750	25.4	2087	LOS RIOS	VENTANAS	2020-01-01	168.209904760393	2Coastal	3.92197946594035	9.1
2314	210650	23.9	3038	SUCUMBIOS	EL DORADO DE CASCALES	2017-01-01	1085.25335257672	3Amazonic	4.5364536557825	9.1
2315	110753	19.8	877	LOJA	NAMBACOLA	2017-01-01	297.582951648837	1Highlands	4.5651389421405	9.1
2316	130153	25	328	MANABI	CRUCITA	2018-01-01	62.7364415399919	2Coastal	4.79119403129947	9.1
235	070950	24.7	860	EL ORO	PASAJE	2019-01-01	131.838457770111	2Coastal	4.54653772817144	9.1
236	111550	19.8	975	LOJA	QUILANGA	2017-01-01	92.3001182466908	1Highlands	4.60914451112536	9.1
237	140650	22.1	2306	MORONA SANTIAGO	SUCUA	2019-01-01	471.746846372294	3Amazonic	4.34709728915061	9.1
3354	070653	25.2	735	EL ORO	TENDALES (CAB. EN PUERTO TENDALES)	2020-01-01	171.682399902272	2Coastal	4.96752260721377	9.1
3355	110950	18.8	1061	LOJA	CATACOCHA	2018-01-01	441.328157318235	1Highlands	4.23750142235606	9.1
3356	131152	23.8	1726	MANABI	SAN SEBASTIAN	2017-01-01	142.487320312515	2Coastal	4.63943764896476	9.1
1277	080264	25.8	2668	ESMERALDAS	TIMBIRE	2018-01-01	21.9186253596308	2Coastal	4.88782420390826	9
1278	011551	22.7	1112	AZUAY	EL CARMEN DE PIJILI	2019-01-01	370.595140970783	1Highlands	4.57674663078796	9
1279	091950	25.3	1116	GUAYAS	EL SALITRE (LAS RAMAS)	2018-01-01	131.152591778773	2Coastal	4.05012822955244	9
1280	190750	21.6	2331	ZAMORA CHINCHIPE	ZUMBI	2018-01-01	163.495423070032	3Amazonic	4.414784084694	9
2317	080558	25.8	2511	ESMERALDAS	SAN JAVIER DE CACHAVI (CAB. EN SAN JAVIER)	2018-01-01	41.7939819012811	2Coastal	4.88935781127106	9
2318	030452	25.1	1588	CAÑAR	PANCHO NEGRO	2019-01-01	160.818373600372	1Highlands	4.45666247855289	9
2319	110656	19.2	1029	LOJA	EL AIRO	2017-01-01	28.1908436471276	1Highlands	4.91493296573955	9
238	210158	24.5	3439	SUCUMBIOS	SANTA CECILIA	2017-01-01	232.803762617352	3Amazonic	4.68974665044345	9
239	091054	25.2	1340	GUAYAS	ROBERTO ASTUDILLO (CAB. EN CRUCE DE VENECIA)	2019-01-01	87.7732144770558	2Coastal	4.48182800161264	9
240	130252	23.9	1381	MANABI	QUIROGA	2017-01-01	61.6235992498325	2Coastal	4.97154682524976	9
3357	210155	24.6	3646	SUCUMBIOS	EL ENO	2017-01-01	445.129223010212	3Amazonic	4.57247127729135	9
3358	090152	24.5	568	GUAYAS	JUAN GOMEZ RENDON (PROGRESO)	2019-01-01	322.752690370829	2Coastal	4.72492440528434	9
3359	130156	23.6	1439	MANABI	SAN PLACIDO	2017-01-01	136.645155421396	2Coastal	4.64273829666732	9
1281	210752	25.2	3243	SUCUMBIOS	AGUAS NEGRAS	2017-01-01	454.779094117203	3Amazonic	5.0334895638169	8.9
1282	110751	18.8	1101	LOJA	CHANGAIMINA (LA LIBERTAD)	2017-01-01	120.435863375187	1Highlands	4.63446955897064	8.9
2320	050554	10.5	679	COTOPAXI	MULLIQUINDIL (SANTA ANA)	2017-01-01	48.1193491908213	1Highlands	4.00115045030574	8.9
2321	090550	25.1	1245	GUAYAS	COLIMES	2017-01-01	545.244005398063	2Coastal	4.29958080426509	8.9
2322	110956	22.3	1612	LOJA	ORIANGA	2018-01-01	183.75337277801	1Highlands	4.43366927585225	8.9
241	080354	24.6	1485	ESMERALDAS	QUINGUE (OLMEDO PERDOMO FRANCO)	2019-01-01	28.0758672944357	2Coastal	5.4699068905915	8.9
242	092750	24.4	2076	GUAYAS	GRAL. ANTONIO ELIZALDE (BUCAY)	2018-01-01	153.235211827161	2Coastal	4.21501706734632	8.9
243	120754	24.3	2174	LOS RIOS	LOS ANGELES	2018-01-01	49.3610216110299	2Coastal	4.40239639868162	8.9
3360	080262	25.8	2751	ESMERALDAS	COLON ELOY DEL MARIA	2018-01-01	71.5651489377928	2Coastal	4.79499478920987	8.9
3361	092050	25.5	1072	GUAYAS	SAN JACINTO DE YAGUACHI	2019-01-01	272.555823133118	2Coastal	4.39600508494477	8.9
3362	240151	24	181	SANTA ELENA	ATAHUALPA	2019-01-01	77.4800438822145	2Coastal	4.9607431495699	8.9
1283	080263	25.8	3090	ESMERALDAS	SAN JOSE DE CAYAPAS	2018-01-01	120.639109410621	2Coastal	4.58086600506527	8.8
1284	110161	19.5	896	LOJA	VILCABAMBA (VICTORIA)	2017-01-01	159.326090404878	1Highlands	4.54732769960191	8.8
1285	190950	19.3	2702	ZAMORA CHINCHIPE	PAQUISHA	2018-01-01	166.382953793443	3Amazonic	4.63569958368177	8.8
2323	220152	24.6	3318	ORELLANA	TARACOA (NUEVA ESPERANZA: YUCA)	2018-01-01	411.719561566775	3Amazonic	4.64084916620644	8.8
2324	111050	22.2	1675	LOJA	ALAMOR	2018-01-01	238.931790843548	1Highlands	4.30643481309447	8.8
244	092053	25.4	1148	GUAYAS	GRAL. PEDRO J. MONTERO (BOLICHE)	2019-01-01	75.2837183926239	2Coastal	4.35424986398128	8.8
245	140251	16.5	1377	MORONA SANTIAGO	AMAZONAS (ROSARIO DE CUYES)	2017-01-01	287.548665009796	3Amazonic	4.3807062293374	8.8
3363	090156	24.6	404	GUAYAS	POSORJA	2019-01-01	75.3183888740446	2Coastal	4.89838972384656	8.8
3364	131952	24.4	285	MANABI	SALANGO	2018-01-01	89.2356521340681	2Coastal	4.91712998126161	8.8
1286	150454	14.7	1507	NAPO	SANTA ROSA	2017-01-01	306.199491757109	3Amazonic	4.70210192377886	8.7
1287	120152	25.3	1893	LOS RIOS	CARACOL	2019-01-01	97.9172311013292	2Coastal	4.30901382841477	8.7
2325	080253	25.9	2604	ESMERALDAS	BORBON	2018-01-01	192.443014401919	2Coastal	4.53368695907856	8.7
2326	070953	25	641	EL ORO	LA PEAÑA	2020-01-01	16.8255364622493	2Coastal	4.69065094151014	8.7
2327	140162	21.7	3278	MORONA SANTIAGO	CUCHAENTZA	2020-01-01	354.426550770829	3Amazonic	4.88873628344104	8.7
246	080755	25.4	1450	ESMERALDAS	ROCAFUERTE	2019-01-01	123.79427546302	2Coastal	4.69498764373285	8.7
247	110250	19.2	1101	LOJA	CARIAMANGA	2017-01-01	373.740811152576	1Highlands	4.38027099871249	8.7
3365	080650	24.9	1146	ESMERALDAS	ATACAMES	2019-01-01	104.825032788409	2Coastal	4.63380915106293	8.7
3366	091151	25.4	1237	GUAYAS	JESUS MARIA	2020-01-01	90.8797925213457	2Coastal	4.53143850444838	8.7
3367	210160	24.6	3356	SUCUMBIOS	10 DE AGOSTO	2017-01-01	50.2488257028431	3Amazonic	4.94799249245384	8.7
1288	020155	13.9	1203	BOLIVAR	SALINAS	2018-01-01	469.496571079585	1Highlands	3.79989081548499	8.6
1289	090153	24.6	423	GUAYAS	MORRO	2019-01-01	265.025132245782	2Coastal	4.54517960846705	8.6
1290	130352	25.4	1177	MANABI	CANUTO	2017-01-01	198.194093768063	2Coastal	4.29866895314913	8.6
1291	190550	22.1	2216	ZAMORA CHINCHIPE	YANTZAZA (YANZATZA)	2018-01-01	271.679804320245	3Amazonic	4.12209494914156	8.6
2328	080165	24.6	1169	ESMERALDAS	TABIAZO	2019-01-01	138.289250377004	2Coastal	4.43339567217671	8.6
2329	091051	25.4	1110	GUAYAS	CHOBO	2019-01-01	42.2890517452231	2Coastal	4.51410164222613	8.6
2330	140750	21.9	3618	MORONA SANTIAGO	HUAMBOYA	2019-01-01	183.821924393194	3Amazonic	4.49288549640825	8.6
248	020151	18.9	2192	BOLIVAR	FACUNDO VELA	2017-01-01	162.088958589001	1Highlands	4.44746646987095	8.6
249	011550	20.7	883	AZUAY	CAMILO PONCE ENRIQUEZ	2018-01-01	268.892478768855	1Highlands	4.4810420903207	8.6
250	111153	18.1	718	LOJA	LLUZHAPA	2017-01-01	73.0372406717176	1Highlands	4.46624464580093	8.6
251	190451	20	1898	ZAMORA CHINCHIPE	LA PAZ	2018-01-01	319.891235347836	3Amazonic	4.49292717982148	8.6
3368	160350	21.6	4373	PASTAZA	SANTA CLARA	2018-01-01	243.480670306513	3Amazonic	4.33936002582578	8.6
3369	091650	25.5	1072	GUAYAS	SAMBORONDON	2019-01-01	222.972067518289	2Coastal	4.28689163138664	8.6
3370	190250	20.8	1094	ZAMORA CHINCHIPE	ZUMBA	2017-01-01	426.196049033763	3Amazonic	4.55246151866139	8.6
1292	220154	24.6	3337	ORELLANA	EL DORADO	2018-01-01	132.87201666989	3Amazonic	4.39880355146393	8.5
1293	120555	24.8	2330	LOS RIOS	LA ESPERANZA	2019-01-01	28.9789974492509	2Coastal	4.54833231146787	8.5
2331	080260	25.6	2910	ESMERALDAS	SELVA ALEGRE	2018-01-01	49.2859211236652	2Coastal	4.4670824191945	8.5
2332	070152	25.2	556	EL ORO	EL RETIRO	2020-01-01	121.188416512158	2Coastal	4.58797195741335	8.5
252	080556	26	2467	ESMERALDAS	CONCEPCION	2018-01-01	212.08683351293	2Coastal	4.42449873630875	8.5
253	110554	21.5	1351	LOJA	AMARILLOS	2018-01-01	21.5948739462357	1Highlands	4.63157011064648	8.5
3371	080553	25.9	2577	ESMERALDAS	CALDERON	2018-01-01	24.5610630198114	2Coastal	4.77165308267792	8.5
3372	092055	25.5	1027	GUAYAS	YAGUACHI VIEJO (CONE)	2019-01-01	108.71350294684	2Coastal	4.29262136525882	8.5
1294	220455	20.5	4277	ORELLANA	SAN VICENTE DE HUATICOCHA	2017-01-01	191.755513468012	3Amazonic	4.45913896417732	8.4
1295	190151	22.1	1975	ZAMORA CHINCHIPE	CUMBARATZA	2018-01-01	169.481274656961	3Amazonic	4.18442344191037	8.4
2333	050251	19.8	2368	COTOPAXI	GUASAGANDA (CAB. EN GUASAGANDA CENTRO)	2019-01-01	247.257400977651	1Highlands	3.70402315921939	8.4
2334	071250	25.2	582	EL ORO	SANTA ROSA	2019-01-01	182.438865517912	2Coastal	4.22351271784164	8.4
2335	080852	24.5	2645	ESMERALDAS	LA VILLEGAS	2020-01-01	57.8952923262978	2Coastal	4.34323791807249	8.4
254	220155	25.2	3049	ORELLANA	EL EDEN	2018-01-01	864.162416922726	3Amazonic	4.72558883588017	8.4
255	190150	19.1	1436	ZAMORA CHINCHIPE	ZAMORA	2017-01-01	561.970441184811	3Amazonic	4.26624847074146	8.4
3373	160155	20.8	4397	PASTAZA	FATIMA	2018-01-01	81.8735811794712	3Amazonic	4.32170768843062	8.4
3374	090551	25	1105	GUAYAS	SAN JACINTO	2018-01-01	213.540502365287	2Coastal	4.32865676283707	8.4
1296	150354	22.2	4010	NAPO	SAN PABLO DE USHPAYACU	2018-01-01	152.429073317752	3Amazonic	4.44239990325432	8.3
1297	070956	25	717	EL ORO	CAÑAQUEMADA	2020-01-01	25.1733676783002	2Coastal	4.50086114395719	8.3
1298	111450	22.6	1199	LOJA	PINDAL	2018-01-01	50.7611236755953	1Highlands	4.24784331800882	8.3
2336	220352	24.8	3328	ORELLANA	POMPEYA	2018-01-01	97.8288213552212	3Amazonic	4.57289139770253	8.3
2337	130653	23.3	533	MANABI	JULCUY	2017-01-01	304.643848981675	2Coastal	4.09489849709964	8.3
256	080554	25.8	2551	ESMERALDAS	CARONDELET	2018-01-01	76.2031729840749	2Coastal	4.50158342071647	8.3
257	011350	11.1	1147	AZUAY	SEVILLA DE ORO	2018-01-01	64.4374471008367	1Highlands	4.54532407497212	8.3
258	190652	22.2	2201	ZAMORA CHINCHIPE	PACHICUTZA	2020-01-01	125.831513154904	3Amazonic	4.32916010907554	8.3
3375	050252	16.3	2126	COTOPAXI	PUCAYACU	2017-01-01	180.651030955216	1Highlands	4.08149356740606	8.3
3376	080853	24.5	2786	ESMERALDAS	PLAN PILOTO	2018-01-01	82.7326235918879	2Coastal	4.39854054346116	8.3
3377	131353	24.9	1277	MANABI	LA UNION	2018-01-01	232.257587852956	2Coastal	4.33598062023512	8.3
1299	160351	21.2	4450	PASTAZA	SAN JOSE	2018-01-01	69.046363270847	3Amazonic	4.27967665973486	8.2
1300	090851	25.3	2057	GUAYAS	GUAYAS (PUEBLO NUEVO)	2017-01-01	404.426336912428	2Coastal	3.96374203361176	8.2
2338	080352	25.1	1595	ESMERALDAS	DAULE	2018-01-01	98.3437692232084	2Coastal	4.31120944954247	8.2
2339	210250	23.6	2849	SUCUMBIOS	LUMBAQUI	2020-01-01	317.781116017885	3Amazonic	4.31099127269835	8.2
2340	091153	25.5	879	GUAYAS	SANTA ROSA DE FLANDES	2020-01-01	115.60678333147	2Coastal	4.34074743664734	8.2
259	160162	23.4	3576	PASTAZA	SIMON BOLIVAR (CAB. EN MUSHULLACTA)	2019-01-01	1021.83428057255	3Amazonic	4.09879122525874	8.2
260	220153	24.9	3186	ORELLANA	ALEJANDRO LABAKA	2018-01-01	974.768954329504	3Amazonic	4.44985490087091	8.2
261	131355	25.3	1351	MANABI	SAN PABLO (CAB EN PUEBLO NUEVO)	2018-01-01	213.033972494616	2Coastal	4.2939870853037	8.2
3378	080358	25	1624	ESMERALDAS	SAN JOSE DE CHAMANGA	2018-01-01	146.010325591526	2Coastal	4.24290191398331	8.2
3379	210652	24.3	3152	SUCUMBIOS	SEVILLA	2017-01-01	108.458701456735	3Amazonic	4.39595651797363	8.2
3380	111252	19.6	1080	LOJA	TACAMOROS	2018-01-01	76.1426184490238	1Highlands	4.39771974557023	8.2
1301	080753	25.6	1926	ESMERALDAS	LAGARTO	2018-01-01	212.737217794934	2Coastal	4.3534469688796	8.1
1302	220350	24.7	3467	ORELLANA	LA JOYA DE LOS SACHAS	2017-01-01	195.494203847601	3Amazonic	4.09072006661224	8.1
1303	110450	21.6	1339	LOJA	CELICA	2020-01-01	240.267918601129	1Highlands	3.9443493397069	8.1
2341	180756	16	756	TUNGURAHUA	GARCIA MORENO (CHUMAQUI)	2017-01-01	15.5975895178814	1Highlands	4.08881337462738	8.1
2342	030363	20.7	1306	CAÑAR	DUCUR	2018-01-01	87.1494449252391	1Highlands	4.23420110354497	8.1
2343	120450	25.4	1872	LOS RIOS	PUEBLOVIEJO	2018-01-01	163.396755528423	2Coastal	3.98904821320991	8.1
262	220158	24.4	3232	ORELLANA	LA BELLEZA	2018-01-01	607.812895456417	3Amazonic	4.18185743915821	8.1
263	110350	22.3	733	LOJA	CATAMAYO (LA TOMA)	2018-01-01	145.153366790519	1Highlands	4.10702661135489	8.1
264	140256	20.1	2212	MORONA SANTIAGO	NUEVA TARQUI	2019-01-01	34.986465363568	3Amazonic	4.36258911914956	8.1
3381	210351	25	3429	SUCUMBIOS	PALMA ROJA	2017-01-01	1153.96358612324	3Amazonic	4.53404909401069	8.1
3382	070650	25.1	716	EL ORO	EL GUABO	2020-01-01	204.236265171525	2Coastal	4.3052847255774	8.1
3383	130851	23.5	261	MANABI	SAN LORENZO	2018-01-01	61.1579643798894	2Coastal	4.76900936746414	8.1
1304	080752	25.1	1954	ESMERALDAS	CHUMUNDE	2019-01-01	504.149888542715	2Coastal	4.22754989868345	8
1305	030550	10.1	710	CAÑAR	EL TAMBO	2017-01-01	64.0309419395582	1Highlands	4.39266260789942	8
1306	131650	23.7	911	MANABI	SUCRE	2019-01-01	196.510103099651	2Coastal	3.89806377072011	8
2344	160164	20.9	4404	PASTAZA	TENIENTE HUGO ORTIZ	2018-01-01	104.63707588503	3Amazonic	4.07939234241064	8
2345	110550	22.9	1448	LOJA	CHAGUARPAMBA	2018-01-01	101.382931448777	1Highlands	4.05481905876148	8
2346	131951	23.7	354	MANABI	MACHALILLA	2020-01-01	141.07764799553	2Coastal	4.13817025292085	8
265	030351	17.7	922	CAÑAR	CHONTAMARCA	2017-01-01	214.937918693304	1Highlands	4.15843209571845	8
266	131351	24.8	1031	MANABI	AYACUCHO	2018-01-01	109.463849104118	2Coastal	4.18184426411928	8
267	190352	20.9	1801	ZAMORA CHINCHIPE	NUEVO PARAISO	2018-01-01	919.458822515291	3Amazonic	4.36264251346767	8
3384	160450	23.4	3877	PASTAZA	ARAJUNO	2019-01-01	637.336249537413	3Amazonic	4.20094797188789	8
3385	111051	23.1	1480	LOJA	CIANO	2019-01-01	81.130236855388	1Highlands	4.29178605786029	8
3386	140455	21.9	3966	MORONA SANTIAGO	16 DE AGOSTO	2019-01-01	94.030304100714	3Amazonic	4.22787027649942	8
1307	040156	23	3824	CARCHI	TOBAR DONOSO (LA BOCANA DE CAMUMBI)	2017-01-01	625.661704162903	1Highlands	4.33457357364932	7.9
1308	080750	25.4	1121	ESMERALDAS	RIOVERDE	2020-01-01	71.8053521921063	2Coastal	3.86687355889207	7.9
1309	131550	25.1	598	MANABI	TOSAGUA	2017-01-01	249.68378967894	2Coastal	3.9610800877969	7.9
2347	050250	23.9	2682	COTOPAXI	LA MANA	2017-01-01	229.078569860696	1Highlands	3.77265173512574	7.9
2348	071453	22.9	1386	EL ORO	SAN ISIDRO	2018-01-01	29.3976277693829	2Coastal	4.24359406570666	7.9
2349	190251	21	1307	ZAMORA CHINCHIPE	CHITO	2018-01-01	355.603825345074	3Amazonic	4.59425883860152	7.9
268	080559	25.5	2610	ESMERALDAS	SANTA RITA	2018-01-01	81.2539776420679	2Coastal	4.35131020262529	7.9
269	131051	24.5	928	MANABI	CAMPOZANO (LA PALMA DE PAJAN)	2018-01-01	247.016046891392	2Coastal	4.14170865641965	7.9
3387	080555	25.2	2702	ESMERALDAS	5 DE JUNIO (CAB. EN UIMBI)	2018-01-01	211.725915707593	2Coastal	4.31612152284787	7.9
3388	121051	24.4	2643	LOS RIOS	PATRICIA PILAR	2018-01-01	166.223704846938	2Coastal	4.09530315175439	7.9
3389	190254	22.8	1304	ZAMORA CHINCHIPE	LA CHONTA	2019-01-01	18.2959817445794	3Amazonic	4.86108428334172	7.9
1310	080557	25.3	3018	ESMERALDAS	MATAJE (CAB. EN SANTANDER)	2018-01-01	292.585910730837	2Coastal	4.45037825370429	7.8
1311	210156	24.8	3562	SUCUMBIOS	PACAYACU	2017-01-01	874.201509680111	3Amazonic	4.21199209706513	7.8
1312	091250	25	1602	GUAYAS	NARANJITO	2019-01-01	224.833665258736	2Coastal	3.96550722504429	7.8
1313	190256	22.8	1304	ZAMORA CHINCHIPE	PUCAPAMBA	2019-01-01	22.1370305402618	3Amazonic	4.79859830085238	7.8
2350	160250	19.5	3615	PASTAZA	MERA	2018-01-01	359.897532240163	3Amazonic	4.02453617834935	7.8
2351	070350	18.2	1085	EL ORO	PACCHA	2017-01-01	46.6899214719831	2Coastal	4.17112964489483	7.8
2352	110552	23.2	1439	LOJA	EL ROSARIO	2019-01-01	91.9117549371997	1Highlands	4.10478544165457	7.8
2353	190952	20.8	2584	ZAMORA CHINCHIPE	NUEVO QUITO	2019-01-01	115.806222055009	3Amazonic	4.43767424441588	7.8
270	020553	18.6	1378	BOLIVAR	REGULO DE MORA	2017-01-01	69.6291641638441	1Highlands	4.02336671420467	7.8
271	210152	24.8	3552	SUCUMBIOS	DURENO	2017-01-01	251.355359148205	3Amazonic	4.11713278130564	7.8
272	071254	25.3	632	EL ORO	SAN ANTONIO	2020-01-01	23.642641004478	2Coastal	4.37555886052646	7.8
273	140552	19.6	2724	MORONA SANTIAGO	CHUPIANZA	2019-01-01	100.637509319457	3Amazonic	4.22336359455502	7.8
3390	180251	16.6	1101	TUNGURAHUA	LLIGUA	2017-01-01	10.1795512381606	1Highlands	4.40749941299352	7.8
3391	071251	25.3	597	EL ORO	BELLAVISTA	2020-01-01	49.1222599567818	2Coastal	4.32582864200888	7.8
3392	130952	23.7	420	MANABI	LA PILA	2018-01-01	98.4654576176363	2Coastal	4.30402188211257	7.8
3393	240156	23.9	166	SANTA ELENA	SAN JOSE DE ANCON	2019-01-01	66.3031286322062	2Coastal	4.49562993116126	7.8
1314	050351	22.5	2278	COTOPAXI	MORASPUNGO	2017-01-01	436.745196868504	1Highlands	3.69830602586285	7.7
1315	011250	15.2	1075	AZUAY	EL PAN	2017-01-01	17.2832652546204	1Highlands	4.1806620616375	7.7
1316	071053	22.6	1438	EL ORO	MOROMORO (CAB. EN EL VADO)	2018-01-01	85.596613799181	2Coastal	4.06300913374933	7.7
1317	120154	25.4	1582	LOS RIOS	PIMOCHA	2020-01-01	268.670947677308	2Coastal	3.65337652626762	7.7
1318	130152	24.9	972	MANABI	ALHAJUELA (BAJO GRANDE)	2018-01-01	24.4189735982726	2Coastal	4.23864792006545	7.7
2354	050457	18.8	2325	COTOPAXI	TINGO	2017-01-01	194.5074637649	1Highlands	3.76200004043687	7.7
2355	070951	25.1	658	EL ORO	BUENAVISTA	2020-01-01	40.9876334970628	2Coastal	4.20764587281935	7.7
2356	071355	17.7	1024	EL ORO	HUERTAS	2017-01-01	47.090026822844	2Coastal	4.12270317864558	7.7
2357	120250	25.3	1250	LOS RIOS	BABA	2017-01-01	172.303306804369	2Coastal	3.77345939446546	7.7
274	020750	24.4	2187	BOLIVAR	LAS NAVES	2019-01-01	148.694355626172	1Highlands	3.93911691670862	7.7
275	011150	15.2	836	AZUAY	CHORDELEG	2018-01-01	16.2957361498751	1Highlands	3.94031716950432	7.7
276	071052	24.6	1022	EL ORO	LA BOCANA	2018-01-01	61.6100249095931	2Coastal	4.01145340173491	7.7
277	110553	23.3	1421	LOJA	SANTA RUFINA	2018-01-01	54.3855070973889	1Highlands	4.09797245015613	7.7
278	121250	25.3	1869	LOS RIOS	MOCACHE	2017-01-01	568.077383799358	2Coastal	3.69394859859164	7.7
3394	220160	24.1	3388	ORELLANA	SAN JOSE DE GUAYUSA	2018-01-01	458.885528077174	3Amazonic	4.0984894970071	7.7
3395	070955	22.9	1075	EL ORO	UZHCURRUMI	2019-01-01	30.863796267758	2Coastal	4.11893687185038	7.7
3396	071356	22.9	1371	EL ORO	MALVAS	2019-01-01	13.5216759897651	2Coastal	4.26793050582998	7.7
3397	120851	25.3	1280	LOS RIOS	ANTONIO SOTOMAYOR (CAB. EN PLAYAS DE VINCES)	2018-01-01	142.39166160993	2Coastal	3.95971295062204	7.7
1320	091952	25.4	1171	GUAYAS	LA VICTORIA (ÑAUZA)	2019-01-01	81.5885843056987	2Coastal	4.03634237833703	7.6
1324	131753	24.4	1177	MANABI	ATAHUALPA	2017-01-01	168.716789114623	2Coastal	4.19483440709476	7.6
2358	080561	25.4	2756	ESMERALDAS	TULULBI (CAB. EN RICAURTE)	2018-01-01	351.91373527898	2Coastal	4.18621652035013	7.6
2360	111353	24.1	432	LOJA	LIMONES	2020-01-01	231.682194845331	1Highlands	4.42695873735979	7.6
2364	140850	19.7	2422	MORONA SANTIAGO	SAN JUAN BOSCO	2018-01-01	153.723856912102	3Amazonic	3.86670400963785	7.6
280	091450	24.8	801	GUAYAS	PEDRO CARBO	2018-01-01	515.123088065879	2Coastal	3.88459544984293	7.6
284	120251	25.4	1555	LOS RIOS	GUARE	2018-01-01	234.158914414575	2Coastal	3.79496443829665	7.6
3398	900451	24.6	1923	GUAYAS	EL PIEDRERO	2020-01-01	170.163145557469	2Coastal	4.1755153929666	7.6
3400	111651	20.4	987	LOJA	LA TINGUE	2018-01-01	51.4998419792928	1Highlands	4.11015824077423	7.6
3404	240152	24.5	359	SANTA ELENA	COLONCHE	2018-01-01	1150.48217463989	2Coastal	3.85957094212884	7.6
1325	080562	25.3	2623	ESMERALDAS	URBINA	2018-01-01	146.170190640408	2Coastal	4.14815934920152	7.5
1326	110451	23.1	1097	LOJA	CRUZPAMBA (CAB EN CARLOS BUSTAMANTE)	2020-01-01	26.8731122338543	1Highlands	4.29763913644527	7.5
1327	140854	21.3	2586	MORONA SANTIAGO	SANTIAGO DE PANANZA	2019-01-01	88.8993121231845	3Amazonic	3.9767977570828	7.5
2365	071151	20.9	1237	EL ORO	CURTINCAPA	2018-01-01	19.6969065766247	2Coastal	4.11092762705487	7.5
2366	110850	23.2	892	LOJA	MACARA	2019-01-01	370.918866340076	1Highlands	3.81733389803878	7.5
285	080550	25.9	2601	ESMERALDAS	SAN LORENZO	2018-01-01	235.842030084159	2Coastal	4.04615596015936	7.5
286	110354	20.4	942	LOJA	ZAMBI	2018-01-01	49.6263674328962	1Highlands	4.08304737534778	7.5
287	130151	25	817	MANABI	ABDON CALDERON (SAN FRANCISCO)	2018-01-01	124.102814886157	2Coastal	3.98197503965081	7.5
3405	090650	25.4	860	GUAYAS	DAULE	2018-01-01	213.479868476915	2Coastal	3.68107719459193	7.5
3406	120350	25.1	1968	LOS RIOS	MONTALVO	2019-01-01	297.215701217385	2Coastal	3.74470473344797	7.5
1328	011050	12.1	699	AZUAY	SAN FELIPE DE OÑA	2020-01-01	221.350635145495	1Highlands	4.01784260223619	7.4
1329	111350	24.6	457	LOJA	ZAPOTILLO	2020-01-01	194.847644757136	1Highlands	4.04868223912936	7.4
1330	140851	21	2465	MORONA SANTIAGO	PAN DE AZUCAR	2019-01-01	84.2447112702531	3Amazonic	3.99797371232746	7.4
2367	160154	21.1	4482	PASTAZA	DIEZ DE AGOSTO	2020-01-01	93.1479406361985	3Amazonic	3.6932503797453	7.4
2368	011152	15.2	836	AZUAY	LA UNION	2017-01-01	14.315120191283	1Highlands	4.30532278802882	7.4
2369	111650	20.7	1131	LOJA	OLMEDO	2018-01-01	60.7971011583879	1Highlands	3.95695660793696	7.4
2370	190158	20.3	2122	ZAMORA CHINCHIPE	SAN CARLOS DE LAS MINAS	2018-01-01	148.836930383979	3Amazonic	3.94896683616042	7.4
288	900151	24.1	2927	IMBABURA	LAS GOLONDRINAS	2018-01-01	127.91810367864	1Highlands	3.91216894016551	7.4
289	110958	22.2	1377	LOJA	CASANGA	2018-01-01	52.319040750101	1Highlands	3.86119886067507	7.4
290	140553	22.7	2548	MORONA SANTIAGO	PATUCA	2020-01-01	256.357748646606	3Amazonic	3.76887856673548	7.4
291	150150	23.1	4257	NAPO	TENA	2020-01-01	79.5688976679178	3Amazonic	3.77465525871509	7.4
3407	160157	21.5	4257	PASTAZA	POMONA	2019-01-01	55.3401236157114	3Amazonic	3.9789912943186	7.4
3408	091350	25.2	1099	GUAYAS	PALESTINA	2018-01-01	193.620143580685	2Coastal	3.88080381646307	7.4
3409	131651	24.2	1281	MANABI	BELLAVISTA	2018-01-01	103.151947694991	2Coastal	3.95189042142304	7.4
3410	240350	24.1	122	SANTA ELENA	SALINAS	2020-01-01	27.3859321328209	2Coastal	4.86575928775539	7.4
1331	080153	24.1	1545	ESMERALDAS	CRNEL. CARLOS CONCHA TORRES (CAB. EN HUELE)	2019-01-01	291.354743406133	2Coastal	3.88354811305468	7.3
1332	230157	23.2	2688	SANTO DOMINGO DE LOS TSACHILAS	SANTA MARIA DEL TOACHI	2017-01-01	353.470640328323	2Coastal	3.66720484214807	7.3
1333	091152	25.2	1392	GUAYAS	SAN CARLOS	2020-01-01	89.6725410999758	2Coastal	3.94352870342509	7.3
1334	111053	23.1	1205	LOJA	EL LIMO (MARIANA DE JESUS)	2020-01-01	204.037277983773	1Highlands	4.05327347872309	7.3
1336	140451	21.1	3736	MORONA SANTIAGO	ARAPICOS	2019-01-01	216.072748623883	3Amazonic	4.06431823521918	7.3
2371	080751	25.2	1521	ESMERALDAS	CHONTADURO	2019-01-01	216.90559204461	2Coastal	3.78297539695549	7.3
2372	070251	25.5	410	EL ORO	CHACRAS	2019-01-01	120.583130323871	2Coastal	4.2563680997177	7.3
2373	091451	25	976	GUAYAS	VALLE DE LA VIRGEN	2018-01-01	101.171058869567	2Coastal	3.78484521962005	7.3
2374	130350	24.3	1638	MANABI	CHONE	2018-01-01	829.255693772555	2Coastal	3.52674223343623	7.3
292	220358	24.7	3368	ORELLANA	UNION MILAGREÑA	2018-01-01	137.44129627161	3Amazonic	3.99190619396674	7.3
293	071350	22.6	1441	EL ORO	ZARUMA	2018-01-01	11.3399145286749	2Coastal	3.93381231569568	7.3
294	110957	22.1	1202	LOJA	SAN ANTONIO	2018-01-01	35.3939985658769	1Highlands	3.85263863865277	7.3
296	131053	24.5	1044	MANABI	GUALE	2018-01-01	114.867103999801	2Coastal	3.90210870447017	7.3
3411	170950	24.8	2877	PICHINCHA	PUERTO QUITO	2017-01-01	694.590238859631	1Highlands	3.61929041599064	7.3
3412	070550	20.1	1101	EL ORO	CHILLA	2018-01-01	331.424910227917	2Coastal	3.81735218677972	7.3
3413	110954	18.2	1329	LOJA	LAURO GUERRERO	2017-01-01	98.6155609879225	1Highlands	3.89574360441106	7.3
3414	130452	24.7	2469	MANABI	SAN PEDRO DE SUMA	2017-01-01	189.098902574492	2Coastal	3.79814198972741	7.3
1337	080451	23.7	1974	ESMERALDAS	CUBE	2018-01-01	699.472381718287	2Coastal	3.78425938475614	7.2
1338	010251	19.2	627	AZUAY	ASUNCION	2018-01-01	58.1469541396233	1Highlands	3.91318955154508	7.2
1339	111055	20.6	1536	LOJA	VICENTINO	2018-01-01	56.7962620301985	1Highlands	3.92397524808389	7.2
1340	190351	21.7	2219	ZAMORA CHINCHIPE	ZURMI	2019-01-01	915.1142116519	3Amazonic	4.04907562831298	7.2
2376	020355	18.5	1543	BOLIVAR	TELIMBELA	2019-01-01	158.180219902111	1Highlands	3.79278796137418	7.2
2377	160163	21.4	4348	PASTAZA	TARQUI	2019-01-01	87.8077046504646	3Amazonic	3.84659967136685	7.2
2378	030353	16.6	861	CAÑAR	GENERAL MORALES (SOCARTE)	2017-01-01	114.080143784619	1Highlands	3.83185434870848	7.2
2379	111451	21.4	1506	LOJA	CHAQUINAL	2019-01-01	17.2670549247033	1Highlands	3.9542696996309	7.2
2380	900351	24.9	2237	MANABI	MANGA DEL CURA	2018-01-01	482.967281139763	2Coastal	3.79549143094944	7.2
297	080353	24.6	1413	ESMERALDAS	GALERA	2019-01-01	67.9193853416731	2Coastal	4.43820523681223	7.2
298	220354	24.4	3550	ORELLANA	SAN SEBASTIAN DEL COCA	2018-01-01	283.234117301992	3Amazonic	3.81963253239696	7.2
299	110651	21.2	919	LOJA	BELLAVISTA	2018-01-01	77.3885385320502	1Highlands	4.05504213270942	7.2
300	131352	24.5	1346	MANABI	HONORATO VASQUEZ (CAB EN VASQUEZ)	2018-01-01	156.606571996521	2Coastal	3.96730775311087	7.2
3416	080351	25.1	1637	ESMERALDAS	BOLIVAR	2019-01-01	44.177540574317	2Coastal	4.11124477260347	7.2
3417	210450	24.8	3467	SUCUMBIOS	SHUSHUFINDI	2017-01-01	449.264783735042	3Amazonic	3.74658353280546	7.2
3418	071359	18.4	937	EL ORO	SALVIAS	2017-01-01	97.0755766023239	2Coastal	3.87246895519845	7.2
3419	120850	25.4	1519	LOS RIOS	VINCES	2017-01-01	554.314917965487	2Coastal	3.66594971244535	7.2
3420	080455	24.9	2348	ESMERALDAS	LA UNION	2017-01-01	655.531117939651	2Coastal	3.58241212341047	7.2
1341	011051	17.9	811	AZUAY	SUSUDEL	2018-01-01	72.4770169023058	1Highlands	3.86675310694242	7.1
1342	091953	25.3	1112	GUAYAS	JUNQUILLAL	2018-01-01	97.6800553768206	2Coastal	3.6548596800842	7.1
1343	131551	25.7	839	MANABI	BACHILLERO	2018-01-01	59.4133476210152	2Coastal	3.85433738897149	7.1
1344	240153	24.1	438	SANTA ELENA	CHANDUY	2018-01-01	773.181382023579	2Coastal	3.7266631651305	7.1
2381	090656	25.2	870	GUAYAS	LOS LOJAS (ENRIQUE BAQUERIZO MORENO)	2019-01-01	118.507746761444	2Coastal	3.8170405614283	7.1
2382	111453	23	1068	LOJA	MILAGROS	2020-01-01	90.7769391029227	1Highlands	3.93588981660908	7.1
2383	140150	21.1	2650	MORONA SANTIAGO	MACAS	2020-01-01	53.5170435768361	3Amazonic	3.80075627465915	7.1
2384	190753	21.9	2117	ZAMORA CHINCHIPE	PANGUINTZA	2019-01-01	44.7299948394641	3Amazonic	3.9120880612568	7.1
301	210452	25.1	3059	SUCUMBIOS	PAÑACOCHA	2018-01-01	632.041019122536	3Amazonic	4.13013720572344	7.1
302	091154	25.5	1014	GUAYAS	TAURA	2020-01-01	918.78851925035	2Coastal	3.7028905658292	7.1
303	131054	24.4	1220	MANABI	LASCANO	2018-01-01	143.954612823519	2Coastal	3.80873039315404	7.1
304	190852	18.2	1288	ZAMORA CHINCHIPE	SAN FRANCISCO DEL VERGEL	2017-01-01	203.161391917045	3Amazonic	4.12837190200935	7.1
3421	091050	25.2	1267	GUAYAS	MILAGRO	2019-01-01	220.623621956842	2Coastal	3.6149563604637	7.1
3422	130155	25.1	537	MANABI	RIOCHICO (RIO CHICO)	2018-01-01	82.8726235858798	2Coastal	3.86458440396113	7.1
3423	190252	22.6	1333	ZAMORA CHINCHIPE	EL CHORRO	2019-01-01	14.8479057002715	3Amazonic	4.40781757522492	7.1
1345	220356	24.4	3620	ORELLANA	RUMIPAMBA	2018-01-01	72.9151103115867	3Amazonic	4.00286379336254	7
1346	110254	20.1	990	LOJA	SANGUILLIN	2018-01-01	98.6719625107832	1Highlands	4.02729288880033	7
1347	121150	24	2585	LOS RIOS	VALENCIA	2020-01-01	977.857667136377	2Coastal	3.26098406706835	7
1348	140350	16.7	1720	MORONA SANTIAGO	GRAL. LEONIDAS PLAZA GUTIERREZ	2017-01-01	291.310690863317	3Amazonic	3.58054555919741	7
2385	080652	24.9	1331	ESMERALDAS	SUA (CAB. EN LA BOCANA)	2019-01-01	70.8938073771759	2Coastal	3.88424793450032	7
2386	110653	18.1	1097	LOJA	SANTA TERESITA	2017-01-01	77.2340783735341	1Highlands	4.02263023345825	7
2387	131552	25.5	751	MANABI	ANGEL PEDRO GILER (LA ESTANCILLA)	2018-01-01	67.1902646216515	2Coastal	3.78530727610423	7
2388	140550	17.2	2577	MORONA SANTIAGO	SANTIAGO DE MENDEZ	2018-01-01	299.790987693705	3Amazonic	3.68767822588218	7
305	080452	25.4	2188	ESMERALDAS	CHURA (CHANCAMA) (CAB. EN EL YERBERO)	2019-01-01	219.771983482958	2Coastal	3.82097216879276	7
306	091951	25.3	1179	GUAYAS	GRAL. VERNAZA (DOS ESTEROS)	2017-01-01	83.1507394124873	2Coastal	3.49090633951042	7
307	111251	20.7	1131	LOJA	NUEVA FATIMA	2019-01-01	46.4490626055076	1Highlands	4.10926741721847	7
308	131751	24.8	1564	MANABI	COJIMIES	2018-01-01	736.938011931452	2Coastal	3.77246962888692	7
3424	080356	24.9	1647	ESMERALDAS	SAN FRANCISCO	2019-01-01	189.403984320936	2Coastal	4.09634136773407	7
3425	071150	23.5	1293	EL ORO	PORTOVELO	2019-01-01	38.3715372105088	2Coastal	3.7718817242167	7
3426	111052	21.8	1604	LOJA	EL ARENAL	2019-01-01	28.6077505638886	1Highlands	3.98100563465315	7
3427	131652	23.8	1163	MANABI	NOBOA	2018-01-01	146.075275117938	2Coastal	3.75556880840527	7
1349	220454	24.2	3196	ORELLANA	SAN JOSE DE DAHUANO	2019-01-01	501.216047403402	3Amazonic	3.81264795489232	6.9
1350	120452	25.4	1687	LOS RIOS	SAN JUAN	2019-01-01	90.9658969311553	2Coastal	3.68168256869327	6.9
2389	070250	25.5	563	EL ORO	ARENILLAS	2019-01-01	393.824110571816	2Coastal	3.58201038699	6.9
2390	130154	24.5	787	MANABI	PUEBLO NUEVO	2018-01-01	36.5687618747415	2Coastal	3.87951276647254	6.9
309	220161	24.6	3338	ORELLANA	SAN LUIS DE ARMENIA	2019-01-01	318.35318165115	3Amazonic	3.78107952768105	6.9
310	091850	25.3	952	GUAYAS	SANTA LUCIA	2018-01-01	357.863164355174	2Coastal	3.50544449881565	6.9
311	080265	25.8	2148	ESMERALDAS	SANTA LUCIA DE LAS PEÑAS	2018-01-01	90.6113109348044	2Coastal	3.79860272933804	6.9
3428	160251	21.5	4204	PASTAZA	MADRE TIERRA	2019-01-01	132.171184520285	3Amazonic	3.7057042138865	6.9
3429	070354	22.5	1411	EL ORO	SAN JOSE	2018-01-01	2.22878285021488	2Coastal	3.850139300803	6.9
3430	130950	24.6	280	MANABI	MONTECRISTI	2018-01-01	653.759650226983	2Coastal	3.60733991179888	6.9
1351	080159	24.4	1805	ESMERALDAS	MAJUA	2019-01-01	130.903687114182	2Coastal	3.71983282960517	6.8
1352	010157	16.9	782	AZUAY	MOLLETURO	2019-01-01	977.081212636694	1Highlands	3.58165830879656	6.8
1353	071358	18.5	1001	EL ORO	SINSAO	2017-01-01	45.4219775435644	2Coastal	3.75938578409521	6.8
1354	110655	20.3	940	LOJA	EL INGENIO	2018-01-01	72.3992344005106	1Highlands	3.79639563262645	6.8
1355	120753	22.7	1933	LOS RIOS	CHACARITA	2018-01-01	67.1980965333639	2Coastal	3.69469440534689	6.8
2391	150155	22.5	3956	NAPO	PUERTO MISAHUALLI	2018-01-01	347.934013741242	3Amazonic	3.58216639245214	6.8
2392	070750	25.4	344	EL ORO	HUAQUILLAS	2020-01-01	63.5663014742921	2Coastal	4.1822476775422	6.8
2393	071452	23.3	1343	EL ORO	EL PARAISO	2019-01-01	77.354373709426	2Coastal	3.70538333040231	6.8
2394	130250	24.8	1353	MANABI	CALCETA	2017-01-01	355.677807196953	2Coastal	3.46411875693518	6.8
2395	140353	22.7	2592	MORONA SANTIAGO	SAN ANTONIO (CAB EN SAN ANTONIO CENTRO)	2020-01-01	803.804172857082	3Amazonic	3.66018075364043	6.8
312	220452	24.4	3231	ORELLANA	PUERTO MURIALDO	2019-01-01	193.32766552957	3Amazonic	3.73725193135465	6.8
313	071253	24.9	787	EL ORO	LA AVANZADA	2020-01-01	65.7843633764011	2Coastal	3.83320354132626	6.8
314	110456	23.5	829	LOJA	SABANILLA	2020-01-01	139.698580007999	1Highlands	3.69267530011966	6.8
315	190450	20.3	1748	ZAMORA CHINCHIPE	28 DE MAYO (SAN JOSE DE YACUAMBI)	2019-01-01	483.949728734233	3Amazonic	3.58920808174971	6.8
3431	210451	24.8	3255	SUCUMBIOS	LIMONCOCHA	2018-01-01	598.602283597536	3Amazonic	3.80928103420674	6.8
3432	071153	20.4	1078	EL ORO	SALATI	2018-01-01	150.177235556719	2Coastal	3.70388142308863	6.8
3433	110156	18.7	968	LOJA	MALACATOS (VALLADOLID)	2017-01-01	205.918836444199	1Highlands	3.62444511825629	6.8
3434	140255	19.8	2228	MORONA SANTIAGO	EL ROSARIO	2019-01-01	97.286701314795	3Amazonic	3.68669050143924	6.8
1356	080450	24.9	2254	ESMERALDAS	ROSA ZARATE (QUININDE)	2019-01-01	1040.68834153866	2Coastal	3.25013146669827	6.7
1357	230154	24.5	2744	SANTO DOMINGO DE LOS TSACHILAS	SAN JACINTO DEL BUA	2018-01-01	204.312793876094	2Coastal	3.1002915696283	6.7
1358	111355	23.3	749	LOJA	BOLASPAMBA	2020-01-01	131.527571380619	1Highlands	3.83429802872206	6.7
1359	132251	24.3	513	MANABI	CANOA	2017-01-01	386.211162538017	2Coastal	3.87765880892533	6.7
1360	240351	24	141	SANTA ELENA	ANCONCITO	2020-01-01	8.93608157738588	2Coastal	4.46814513822085	6.7
2396	160150	21.2	4438	PASTAZA	PUYO	2020-01-01	87.5943987843427	3Amazonic	3.36843258592785	6.7
2397	070355	22.6	1273	EL ORO	SAN JUAN DE CERRO AZUL	2019-01-01	93.906814342567	2Coastal	3.66310877833396	6.7
2398	120651	25.2	2081	LOS RIOS	RICAURTE	2019-01-01	329.843508090791	2Coastal	3.4586406954235	6.7
2399	140250	19.8	2603	MORONA SANTIAGO	GUALAQUIZA	2018-01-01	381.407107869815	3Amazonic	3.3859069130084	6.7
316	080357	24.9	1761	ESMERALDAS	SAN GREGORIO	2018-01-01	448.658822290396	2Coastal	3.42185286723976	6.7
317	220357	24.5	3627	ORELLANA	TRES DE NOVIEMBRE	2018-01-01	124.079851226756	3Amazonic	3.82207328824046	6.7
318	110252	20	1002	LOJA	EL LUCERO	2018-01-01	51.6081565089018	1Highlands	3.86048038980936	6.7
319	130357	25.1	829	MANABI	SAN ANTONIO	2017-01-01	210.227540183943	2Coastal	3.51276000948234	6.7
320	190951	19.7	2747	ZAMORA CHINCHIPE	BELLAVISTA	2019-01-01	57.0164641222034	3Amazonic	3.95554812373407	6.7
3435	080261	23.8	2562	ESMERALDAS	TELEMBI	2018-01-01	1282.06525610084	2Coastal	3.64449828831806	6.7
3436	220353	24.7	3397	ORELLANA	SAN CARLOS	2020-01-01	134.333983576004	3Amazonic	3.53661135844676	6.7
3437	092550	25.3	789	GUAYAS	NARCISA DE JESUS	2019-01-01	136.813246493227	2Coastal	3.6477933891981	6.7
3438	130150	25.4	427	MANABI	PORTOVIEJO	2019-01-01	418.513122337678	2Coastal	3.23709178459704	6.7
3439	140651	19.6	2728	MORONA SANTIAGO	ASUNCION	2019-01-01	200.291557351608	3Amazonic	3.47038739351732	6.7
1361	070255	25.4	574	EL ORO	CARCABON	2020-01-01	77.9800849570348	2Coastal	3.87153752704461	6.6
1362	111351	23	728	LOJA	MANGAHURCO	2020-01-01	171.993532064061	1Highlands	4.00548133212151	6.6
1363	131150	25.2	1698	MANABI	PICHINCHA	2018-01-01	505.5988319158	2Coastal	3.53756001824862	6.6
2400	080350	25.2	1835	ESMERALDAS	MUISNE	2020-01-01	173.975605598185	2Coastal	3.31541869240543	6.6
2401	070352	18.2	1085	EL ORO	CORDONCILLO	2020-01-01	30.8343395679013	2Coastal	3.87485219290848	6.6
2402	120550	25.1	2148	LOS RIOS	QUEVEDO	2020-01-01	190.895206139925	2Coastal	3.26627144098318	6.6
2403	190553	20.9	2739	ZAMORA CHINCHIPE	LOS ENCUENTROS	2019-01-01	475.828042215437	3Amazonic	3.48039263318756	6.6
321	070254	25.5	646	EL ORO	PALMALES	2019-01-01	214.182419182979	2Coastal	3.67564102091151	6.6
322	071357	22.5	1411	EL ORO	MULUNCAY GRANDE	2019-01-01	7.03578568383687	2Coastal	3.75236016188198	6.6
323	130654	23.2	1136	MANABI	LA UNION	2018-01-01	46.6807386143927	2Coastal	3.69341846033734	6.6
3440	180252	16.5	1529	TUNGURAHUA	RIO NEGRO	2019-01-01	628.339063257303	1Highlands	3.53537895654243	6.6
3441	071051	22.8	1474	EL ORO	CAPIRO (CAB. EN LA CAPILLA DE CAPIRO)	2018-01-01	144.528452346036	2Coastal	3.46799423353026	6.6
3442	130652	23.2	920	MANABI	EL ANEGADO (CAB. EN ELOY ALFARO)	2018-01-01	117.141432248432	2Coastal	3.70203763829635	6.6
1364	080653	25	1392	ESMERALDAS	TONCHIGUE	2019-01-01	134.251527814466	2Coastal	3.7450238287399	6.5
1365	010851	21.3	679	AZUAY	ABDON CALDERON (LA UNION)	2019-01-01	59.9393976905427	1Highlands	3.6154385566526	6.5
1366	111452	23.1	1225	LOJA	12 DE DICIEMBRE (CAB. EN ACHIOTES)	2020-01-01	43.5331879357359	1Highlands	3.68690881912506	6.5
1367	131950	23.1	419	MANABI	PUERTO LOPEZ	2018-01-01	200.465738482838	2Coastal	3.68079095961718	6.5
1368	190153	16.7	1268	ZAMORA CHINCHIPE	IMBANA (LA VICTORIA DE IMBANA)	2017-01-01	338.706718917414	3Amazonic	3.55138323736042	6.5
2404	150151	23.8	3590	NAPO	AHUANO	2019-01-01	416.362591022061	3Amazonic	3.58039464525166	6.5
2405	092850	25.1	828	GUAYAS	ISIDRO AYORA	2019-01-01	487.755472323231	2Coastal	3.52703200933611	6.5
2406	120451	25.4	1991	LOS RIOS	PUERTO PECHICHE	2019-01-01	81.1668096842774	2Coastal	3.4868361485359	6.5
2407	140358	16.7	1932	MORONA SANTIAGO	YUNGANZA (CAB EN EL ROSARIO)	2018-01-01	223.781702205291	3Amazonic	3.53845253786698	6.5
2408	080850	24.5	2751	ESMERALDAS	LA CONCORDIA	2018-01-01	81.3682817434316	2Coastal	3.25463384187098	6.5
324	080258	25.7	2814	ESMERALDAS	SAN FRANCISCO DE ONZOLE	2019-01-01	165.254993903695	2Coastal	3.70327996806006	6.5
325	210453	25	3248	SUCUMBIOS	SAN ROQUE (CAB. EN SAN VICENTE)	2018-01-01	644.191982242226	3Amazonic	3.81458657749083	6.5
326	110851	20.6	1181	LOJA	LARAMA	2019-01-01	93.3840479950929	1Highlands	3.73346426508007	6.5
327	131453	24.5	455	MANABI	CHARAPOTO	2018-01-01	215.747586483596	2Coastal	3.66348082188179	6.5
328	141052	19.8	3193	MORONA SANTIAGO	SHIMPIS	2020-01-01	259.627427493573	3Amazonic	3.82097126428891	6.5
3443	080152	24.8	1021	ESMERALDAS	CAMARONES (CAB. EN SAN VICENTE)	2020-01-01	165.578417443687	2Coastal	3.61819122218995	6.5
3444	210153	24.6	3528	SUCUMBIOS	GENERAL FARFAN	2017-01-01	517.313046091897	3Amazonic	3.68736567258941	6.5
3445	110457	22.5	1171	LOJA	TNTE. MAXIMILIANO RODRIGUEZ LOAIZA	2020-01-01	34.8355119964838	1Highlands	3.72571875642826	6.5
3446	130251	24.8	1541	MANABI	MEMBRILLO	2018-01-01	121.204960511822	2Coastal	3.73024232075915	6.5
3447	140452	18.6	2677	MORONA SANTIAGO	CUMANDA (CAB EN COLONIA AGRICOLA SEVILLA DEL ORO)	2018-01-01	824.332480141955	3Amazonic	3.51383618817212	6.5
1369	071255	23.9	1139	EL ORO	TORATA	2019-01-01	65.3526655272154	2Coastal	3.52902442625932	6.4
1370	130354	24.5	1914	MANABI	CHIBUNGA	2017-01-01	570.888905889416	2Coastal	3.37740303031294	6.4
1371	140351	22	2440	MORONA SANTIAGO	INDANZA	2019-01-01	72.0040234719412	3Amazonic	3.38270077497743	6.4
2409	071450	24.6	932	EL ORO	LA VICTORIA	2020-01-01	109.171207805511	2Coastal	3.80204551295314	6.4
2410	130651	22.7	962	MANABI	AMERICA	2018-01-01	78.104162989491	2Coastal	3.67681621032347	6.4
2411	140450	21.7	4065	MORONA SANTIAGO	PALORA (METZERA)	2019-01-01	123.574904805953	3Amazonic	3.46790759660145	6.4
329	070654	23.9	1051	EL ORO	RIO BONITO	2020-01-01	153.487102261493	2Coastal	3.64182335691656	6.4
330	091452	24.9	786	GUAYAS	SABANILLA	2019-01-01	319.180613389997	2Coastal	3.61296675672193	6.4
331	140164	10.5	1660	MORONA SANTIAGO	RIO BLANCO	2020-01-01	454.618683540797	3Amazonic	3.47757065142839	6.4
3448	010652	19.2	760	AZUAY	SAN RAFAEL DE SHARUG	2018-01-01	69.2411083570364	1Highlands	3.86418180208129	6.4
3449	090450	25.7	1364	GUAYAS	BALZAR	2017-01-01	1187.98579200606	2Coastal	3.19650016061981	6.4
3450	140151	18.3	2538	MORONA SANTIAGO	ALSHI (CAB EN 9 DE OCTUBRE)	2019-01-01	273.567431568929	3Amazonic	3.47285636826793	6.4
1372	080168	25	899	ESMERALDAS	VUELTA LARGA	2020-01-01	73.6957819474648	2Coastal	3.75643036530655	6.3
1373	210651	24.2	3090	SUCUMBIOS	SANTA ROSA DE SUCUMBIOS	2018-01-01	54.2168969368234	3Amazonic	3.7645591963056	6.3
1374	092251	25	1705	GUAYAS	CRNEL. LORENZO DE GARAICOA (PEDREGAL)	2020-01-01	163.404666948246	2Coastal	3.47464916523642	6.3
1375	120950	25.5	1588	LOS RIOS	PALENQUE	2018-01-01	579.757127169424	2Coastal	3.4172218593697	6.3
1376	190152	22.2	1988	ZAMORA CHINCHIPE	GUADALUPE	2019-01-01	244.10428875919	3Amazonic	3.41117610806872	6.3
2412	080255	21.6	2151	ESMERALDAS	LUIS VARGAS TORRES (CAB. EN PLAYA DE ORO)	2017-01-01	730.855058229939	2Coastal	3.49699091018598	6.3
2413	070950	24.7	860	EL ORO	PASAJE	2020-01-01	131.838457770111	2Coastal	3.45084657155322	6.3
2414	110853	22.7	995	LOJA	SABIANGO (LA CAPILLA)	2020-01-01	45.3350215284337	1Highlands	3.66634187503012	6.3
2415	131450	24.5	512	MANABI	BAHIA DE CARAQUEZ	2020-01-01	183.285277696096	2Coastal	3.48544719075758	6.3
2416	120351	24.3	2189	LOS RIOS	LA ESMERALDA	2019-01-01	65.9818353082315	2Coastal	3.33854842316432	6.3
332	060254	16.4	849	CHIMBORAZO	HUIGRA	2017-01-01	129.61474161512	1Highlands	3.41258543094035	6.3
333	160152	23.5	3918	PASTAZA	CANELOS	2020-01-01	450.369793782056	3Amazonic	3.59082072124844	6.3
334	092250	25.1	1573	GUAYAS	SIMON BOLIVAR	2020-01-01	128.201286007236	2Coastal	3.44530721200515	6.3
335	111250	21.1	1096	LOJA	SOZORANGA	2019-01-01	289.178128093804	1Highlands	3.44780350752998	6.3
336	140454	21.1	3830	MORONA SANTIAGO	SANGAY (CAB EN NAYAMANACA)	2019-01-01	195.923312425204	3Amazonic	3.5067406798707	6.3
3451	020650	21.9	1919	BOLIVAR	CALUMA	2018-01-01	176.818939703829	1Highlands	2.99549258891605	6.3
3452	150158	18.3	3337	NAPO	SAN JUAN DE MUYUNA	2017-01-01	182.345555783371	3Amazonic	3.67486312631574	6.3
3453	090653	25.3	1024	GUAYAS	LAUREL	2019-01-01	36.5673049938179	2Coastal	3.46932328891493	6.3
3454	111160	21.1	743	LOJA	SUMAYPAMBA	2019-01-01	90.9338986241777	1Highlands	3.56537869632729	6.3
3455	131653	24.4	1211	MANABI	ARQ. SIXTO DURAN BALLEN	2018-01-01	79.959439770993	2Coastal	3.49525460237116	6.3
1377	160165	21.4	4411	PASTAZA	VERACRUZ (INDILLAMA) (CAB. EN INDILLAMA)	2020-01-01	169.44336068284	3Amazonic	3.15493066742913	6.2
1378	220355	24.5	3570	ORELLANA	LAGO SAN PEDRO	2018-01-01	75.8923672222981	3Amazonic	3.59263425070233	6.2
1379	071054	24.9	907	EL ORO	PIEDRAS	2020-01-01	40.3661591245501	2Coastal	3.56761618434636	6.2
1380	130551	24.2	1792	MANABI	SAN FRANCISCO DE NOVILLO (CAB. EN NOVILLO)	2017-01-01	261.419896948876	2Coastal	3.53490757707294	6.2
2417	210350	25.4	3052	SUCUMBIOS	PUERTO EL CARMEN DEL PUTUMAYO	2018-01-01	1196.32500549894	3Amazonic	3.96774042613397	6.2
2418	220450	24.1	3268	ORELLANA	LORETO	2019-01-01	94.8330260817182	3Amazonic	3.67821682011314	6.2
2419	090950	25	1736	GUAYAS	EL TRIUNFO	2018-01-01	395.408451486204	2Coastal	3.10034984702383	6.2
2420	131151	24.7	1820	MANABI	BARRAGANETE	2018-01-01	427.51775443148	2Coastal	3.56937215320973	6.2
337	150950	21.9	4196	NAPO	CARLOS JULIO AROSEMENA TOLA	2020-01-01	501.203476750034	3Amazonic	3.12731764680037	6.2
338	210750	25.1	3250	SUCUMBIOS	TARAPOA	2017-01-01	1134.55801976656	3Amazonic	3.38971946056262	6.2
339	070952	24.4	935	EL ORO	CASACAY	2020-01-01	60.5882962057169	2Coastal	3.62006847547554	6.2
340	111054	19.2	1418	LOJA	MERCADILLO	2018-01-01	27.910585666319	1Highlands	3.64556957420383	6.2
341	140751	21.6	3342	MORONA SANTIAGO	CHIGUAZA	2020-01-01	479.432151666751	3Amazonic	3.46953173458645	6.2
3456	080355	25.1	1491	ESMERALDAS	SALIMA	2019-01-01	43.4471484165439	2Coastal	3.88197764951957	6.2
3457	210352	25.3	3150	SUCUMBIOS	PUERTO BOLIVAR (PUERTO MONTUFAR)	2018-01-01	375.354828441766	3Amazonic	3.98426698354625	6.2
3458	220453	24.2	3280	ORELLANA	SAN JOSE DE PAYAMINO	2019-01-01	832.406239714398	3Amazonic	3.4614848150283	6.2
3459	110162	17.3	1210	LOJA	YANGANA (ARSENIO CASTILLO)	2017-01-01	269.425276492096	1Highlands	3.75337073343599	6.2
3460	131350	24.7	860	MANABI	SANTA ANA DE VUELTA LARGA	2020-01-01	315.529921875266	2Coastal	3.27289825541229	6.2
1381	080259	24.9	2648	ESMERALDAS	SANTO DOMINGO DE ONZOLE	2019-01-01	677.218232745483	2Coastal	3.47181444230128	6.1
1382	210157	24.4	3080	SUCUMBIOS	JAMBELI	2018-01-01	444.417418386517	3Amazonic	3.58366590353494	6.1
1383	090750	25.6	883	GUAYAS	ELOY ALFARO (DURAN)	2020-01-01	300.556622634042	2Coastal	3.45278380630241	6.1
1384	130157	24	1239	MANABI	CHIRIJOS	2018-01-01	76.5646736932384	2Coastal	3.53504579015497	6.1
1385	140852	16.8	2459	MORONA SANTIAGO	SAN CARLOS DE LIMON	2018-01-01	677.83978045083	3Amazonic	3.47151001065393	6.1
2421	080754	25.1	1964	ESMERALDAS	MONTALVO (CAB EN HORQUETA)	2019-01-01	377.913411655041	2Coastal	3.42471167676685	6.1
2422	210254	20.9	3465	SUCUMBIOS	PUERTO LIBRE	2017-01-01	701.889638645818	3Amazonic	3.45480409808616	6.1
2423	110351	20.7	791	LOJA	EL TAMBO	2018-01-01	204.394892349932	1Highlands	3.36641190307172	6.1
2424	130351	24.5	908	MANABI	BOYACA	2017-01-01	235.321144002641	2Coastal	3.34034634273505	6.1
2425	140356	22.4	2483	MORONA SANTIAGO	SAN MIGUEL DE CONCHAY	2020-01-01	128.598596502857	3Amazonic	3.47323500251345	6.1
342	170850	23.1	3715	PICHINCHA	PEDRO VICENTE MALDONADO	2018-01-01	623.110789207164	1Highlands	3.03946435021898	6.1
343	090350	25.3	866	GUAYAS	BALAO	2020-01-01	409.230587299935	2Coastal	3.37967719712189	6.1
344	121350	24.9	2206	LOS RIOS	QUINSALOMA	2020-01-01	282.975859114358	2Coastal	3.00970332660744	6.1
345	140257	14.7	853	MORONA SANTIAGO	SAN MIGUEL DE CUYES	2017-01-01	220.378063060347	3Amazonic	3.45359831612665	6.1
3461	160166	21.7	4417	PASTAZA	EL TRIUNFO	2019-01-01	237.352667614578	3Amazonic	3.33125037178855	6.1
3462	210454	24.6	3611	SUCUMBIOS	SAN PEDRO DE LOS COFANES	2018-01-01	71.3382455701556	3Amazonic	3.5419881081317	6.1
3463	110551	22.5	1495	LOJA	BUENAVISTA	2019-01-01	44.3318836917623	1Highlands	3.41594241564575	6.1
3464	130750	24.9	983	MANABI	JUNIN	2017-01-01	246.289084466966	2Coastal	3.18712647841932	6.1
1386	150156	23.5	3979	NAPO	PUERTO NAPO	2019-01-01	214.648329227995	3Amazonic	3.24621671554195	6
1387	090652	25.4	1009	GUAYAS	JUAN BAUTISTA AGUIRRE (LOS TINTOS)	2019-01-01	49.5964038571641	2Coastal	3.27278982320885	6
1388	190752	22.3	2165	ZAMORA CHINCHIPE	TRIUNFO-DORADO	2020-01-01	53.2326964034445	3Amazonic	3.48221903109886	6
2426	011352	13.7	1322	AZUAY	PALMAS	2017-01-01	70.0723447882998	1Highlands	3.47193511403108	6
2427	091053	25.2	1382	GUAYAS	MARISCAL SUCRE (HUAQUES)	2020-01-01	54.8693914769173	2Coastal	3.39596179684949	6
346	080251	25.7	2709	ESMERALDAS	ANCHAYACU	2019-01-01	245.921247013163	2Coastal	3.48446652682763	6
3465	060551	15.8	775	CHIMBORAZO	CAPZOL	2017-01-01	25.7239098857207	1Highlands	3.446554660958	6
3466	030154	15.4	805	CAÑAR	JAVIER LOYOLA (CHUQUIPATA)	2019-01-01	29.034532012323	1Highlands	3.01816451895897	6
3467	130355	24.3	1025	MANABI	ELOY ALFARO	2017-01-01	346.149415617327	2Coastal	3.37783739085906	6
347	030452	25.1	1588	CAÑAR	PANCHO NEGRO	2020-01-01	160.818373600372	1Highlands	3.25942851549676	6
348	130451	24.5	2304	MANABI	WILFRIDO LOOR MOREIRA (MAICITO)	2017-01-01	290.555557789075	2Coastal	3.35087139853003	6
1389	080560	26	2383	ESMERALDAS	TAMBILLO	2019-01-01	213.159180585892	2Coastal	3.64128950981911	5.9
1390	220151	24.7	3246	ORELLANA	DAYUMA	2019-01-01	1230.80554420568	3Amazonic	3.42352511249249	5.9
1391	071451	23.5	1196	EL ORO	LA LIBERTAD	2020-01-01	82.9160380740957	2Coastal	3.60251834966856	5.9
1392	110756	21.9	787	LOJA	SACAPALCA	2019-01-01	111.013739186659	1Highlands	3.45325861918434	5.9
1393	130650	23.3	652	MANABI	JIPIJAPA	2018-01-01	398.867227625326	2Coastal	3.17121375693004	5.9
1394	131850	24.6	1358	MANABI	OLMEDO	2018-01-01	253.641831873112	2Coastal	3.19712805448026	5.9
1395	080851	24.7	2335	ESMERALDAS	MONTERREY	2018-01-01	102.302324622777	2Coastal	3.31531090071894	5.9
2428	050251	19.8	2368	COTOPAXI	GUASAGANDA (CAB. EN GUASAGANDA CENTRO)	2020-01-01	247.257400977651	1Highlands	2.7543669099703	5.9
2429	180254	17	1475	TUNGURAHUA	ULBA	2020-01-01	88.06080324645	1Highlands	3.43547279940461	5.9
2430	230153	24.2	2735	SANTO DOMINGO DE LOS TSACHILAS	LUZ DE AMERICA	2018-01-01	310.740162039313	2Coastal	3.26652245611515	5.9
2431	110251	18.2	1233	LOJA	COLAISACA	2018-01-01	195.767162204494	1Highlands	3.42324642130128	5.9
2432	110852	22	934	LOJA	LA VICTORIA	2020-01-01	67.8400790143311	1Highlands	3.69285690338212	5.9
2433	130658	23.9	345	MANABI	PUERTO DE CAYO	2019-01-01	171.397495838148	2Coastal	3.4188004507883	5.9
2434	190551	19.6	2366	ZAMORA CHINCHIPE	CHICAÑA	2019-01-01	267.511326898228	3Amazonic	3.22928165229865	5.9
3468	080150	25.2	814	ESMERALDAS	ESMERALDAS	2020-01-01	67.5180727617247	2Coastal	3.73422282011318	5.9
3469	210150	24.6	3410	SUCUMBIOS	NUEVA LOJA	2017-01-01	327.070498123342	3Amazonic	3.23738879025166	5.9
3470	071055	22.5	1497	EL ORO	SAN ROQUE (AMBROSIO MALDONADO)	2018-01-01	45.6344130305087	2Coastal	3.42716978666887	5.9
3471	110253	16.7	1215	LOJA	UTUANA	2020-01-01	120.97484846881	1Highlands	3.53104376392267	5.9
3472	110951	19.2	1269	LOJA	CANGONAMA	2018-01-01	44.0318682175691	1Highlands	3.40886487997355	5.9
3473	130852	24	228	MANABI	SANTA MARIANITA (BOCA DE PACOCHE)	2019-01-01	38.4489122994528	2Coastal	4.00139112294535	5.9
3474	190854	17	1391	ZAMORA CHINCHIPE	LA CANELA	2017-01-01	238.644184490568	3Amazonic	3.64690054573565	5.9
349	080254	25.9	2126	ESMERALDAS	LA TOLA	2019-01-01	151.648317840994	2Coastal	3.64565068453284	5.9
350	210354	25.1	3587	SUCUMBIOS	SANTA ELENA	2018-01-01	515.229428903159	3Amazonic	3.77766126146284	5.9
351	071351	21	910	EL ORO	ABAÑIN	2019-01-01	65.0180502501171	2Coastal	3.39754392902493	5.9
352	110352	19.4	1048	LOJA	GUAYQUICHUMA	2018-01-01	105.971847355435	1Highlands	3.37599999923411	5.9
353	111157	18.6	676	LOJA	SAN SEBASTIAN DE YULUC	2018-01-01	115.508036604449	1Highlands	3.41061798456417	5.9
354	131052	22.7	823	MANABI	CASCOL	2018-01-01	430.049698854009	2Coastal	3.37694573191747	5.9
355	240154	24.2	356	SANTA ELENA	MANGLARALTO	2018-01-01	425.40199767637	2Coastal	3.25238231402278	5.9
1396	080454	25.3	1734	ESMERALDAS	VICHE	2019-01-01	90.9626381912251	2Coastal	3.23359207789872	5.8
1397	092350	25.1	1611	GUAYAS	CORONEL MARCELINO MARIDUEÑA (SAN CARLOS)	2019-01-01	254.410258523689	2Coastal	3.26105783566785	5.8
1398	131250	25.5	484	MANABI	ROCAFUERTE	2020-01-01	279.975836879413	2Coastal	3.10222367143877	5.8
1399	140853	21.8	2450	MORONA SANTIAGO	SAN JACINTO DE WAKAMBEIS	2020-01-01	44.3335712094309	3Amazonic	3.39669705554679	5.8
2435	080252	25.6	3011	ESMERALDAS	ATAHUALPA (CAB. EN CAMARONES)	2019-01-01	246.24704439255	2Coastal	3.33067574149856	5.8
2436	150153	24.1	3208	NAPO	CHONTAPUNTA	2019-01-01	970.951255624739	3Amazonic	3.33108840406493	5.8
2437	120155	25.2	1925	LOS RIOS	LA UNION	2020-01-01	186.710289527272	2Coastal	3.20358503289696	5.8
2438	132150	25.2	267	MANABI	JARAMIJO	2018-01-01	97.3014686080113	2Coastal	3.43266771229042	5.8
2439	240150	24	230	SANTA ELENA	SANTA ELENA	2019-01-01	537.729670052373	2Coastal	3.42008597711248	5.8
3475	080256	26	2425	ESMERALDAS	MALDONADO	2019-01-01	57.3876194987321	2Coastal	3.55401267687192	5.8
3476	180250	11.9	895	TUNGURAHUA	BAÑOS DE AGUA SANTA	2017-01-01	91.5597182779129	1Highlands	3.19257168480185	5.8
3477	121050	24.9	2318	LOS RIOS	SAN JACINTO DE BUENA FE	2020-01-01	415.09797007413	2Coastal	3.00002045889625	5.8
3478	140158	18.4	2607	MORONA SANTIAGO	SINAI	2019-01-01	394.488330344453	3Amazonic	3.23870764473301	5.8
3479	240155	24.4	682	SANTA ELENA	SIMON BOLIVAR (JULIO MORENO)	2019-01-01	573.630196005613	2Coastal	3.2173657876292	5.8
356	080453	25	2694	ESMERALDAS	MALIMPIA	2020-01-01	1167.7383023873	2Coastal	2.96976849662528	5.8
357	220159	24.7	3377	ORELLANA	NUEVO PARAISO (CAB. EN UNION )	2019-01-01	305.243516086083	3Amazonic	3.30739326867631	5.8
358	131050	23.7	925	MANABI	PAJAN	2018-01-01	153.802662105994	2Coastal	3.24167493263675	5.8
359	140650	22.1	2306	MORONA SANTIAGO	SUCUA	2020-01-01	471.746846372294	3Amazonic	3.08352322637472	5.8
1400	210650	23.9	3038	SUCUMBIOS	EL DORADO DE CASCALES	2018-01-01	1085.25335257672	3Amazonic	3.1619234264101	5.7
1401	090654	25.3	926	GUAYAS	LIMONAL	2019-01-01	48.1272814048464	2Coastal	3.22534131443732	5.7
1402	130850	24.3	249	MANABI	MANTA	2018-01-01	192.624190545434	2Coastal	3.29023048297727	5.7
2440	080654	25.2	932	ESMERALDAS	TONSUPA	2019-01-01	84.0807797689104	2Coastal	3.24293243145791	5.7
2441	110353	19.5	900	LOJA	SAN PEDRO DE LA BENDITA	2018-01-01	148.027955828194	1Highlands	3.24151778083029	5.7
3480	010250	15.6	639	AZUAY	GIRON	2017-01-01	240.201366293613	1Highlands	3.26378492181709	5.7
3481	110950	18.8	1061	LOJA	CATACOCHA	2019-01-01	441.328157318235	1Highlands	2.96830799241815	5.7
360	210252	22.4	3546	SUCUMBIOS	GONZALO PIZARRO	2018-01-01	238.241542422549	3Amazonic	3.27599860745119	5.7
361	070954	23.6	997	EL ORO	PROGRESO	2020-01-01	149.803172187303	2Coastal	3.31678572040652	5.7
362	130657	22.6	744	MANABI	PEDRO PABLO GOMEZ	2018-01-01	284.322467004032	2Coastal	3.29568423554531	5.7
1403	230155	23.8	3253	SANTO DOMINGO DE LOS TSACHILAS	VALLE HERMOSO	2017-01-01	309.838428606474	2Coastal	3.00584932028692	5.6
1404	110656	19.2	1029	LOJA	EL AIRO	2018-01-01	28.1908436471276	1Highlands	3.4449035104007	5.6
1405	131152	23.8	1726	MANABI	SAN SEBASTIAN	2018-01-01	142.487320312515	2Coastal	3.23026876162269	5.6
1406	240352	24.2	144	SANTA ELENA	JOSE LUIS TAMAYO (MUEY)	2020-01-01	33.9837799496728	2Coastal	3.76010175008633	5.6
2442	080264	25.8	2668	ESMERALDAS	TIMBIRE	2019-01-01	21.9186253596308	2Coastal	3.43007436014882	5.6
2443	011551	22.7	1112	AZUAY	EL CARMEN DE PIJILI	2020-01-01	370.595140970783	1Highlands	3.225548966385	5.6
2444	110753	19.8	877	LOJA	NAMBACOLA	2018-01-01	297.582951648837	1Highlands	3.17255803166967	5.6
2445	132250	24.6	608	MANABI	SAN VICENTE	2017-01-01	323.05940878199	2Coastal	3.09567272342642	5.6
2446	240250	24.2	152	SANTA ELENA	LA LIBERTAD	2020-01-01	25.1749832232812	2Coastal	3.68979878423064	5.6
3482	210155	24.6	3646	SUCUMBIOS	EL ENO	2018-01-01	445.129223010212	3Amazonic	3.18725616510317	5.6
3483	030358	15.7	799	CAÑAR	SAN ANTONIO	2017-01-01	348.098634960324	1Highlands	3.1986202530315	5.6
3484	111550	19.8	975	LOJA	QUILANGA	2018-01-01	92.3001182466908	1Highlands	3.20369218917733	5.6
3485	190156	19.2	1801	ZAMORA CHINCHIPE	TIMBARA	2018-01-01	127.957615571441	3Amazonic	3.36287763560479	5.6
363	220451	23.5	3452	ORELLANA	AVILA (CAB. EN HUIRUNO)	2019-01-01	330.158439056227	3Amazonic	3.34356552326388	5.6
364	091950	25.3	1116	GUAYAS	EL SALITRE (LAS RAMAS)	2019-01-01	131.152591778773	2Coastal	2.76222567774082	5.6
365	111552	16.8	1149	LOJA	SAN ANTONIO DE LAS ARADAS (CAB. EN LAS ARADAS)	2017-01-01	107.799916149942	1Highlands	3.32875900649065	5.6
366	190750	21.6	2331	ZAMORA CHINCHIPE	ZUMBI	2019-01-01	163.495423070032	3Amazonic	3.08844831353836	5.6
1407	080650	24.9	1146	ESMERALDAS	ATACAMES	2020-01-01	104.825032788409	2Coastal	3.3024549974972	5.5
1408	210752	25.2	3243	SUCUMBIOS	AGUAS NEGRAS	2018-01-01	454.779094117203	3Amazonic	3.51088733835693	5.5
1409	130153	25	328	MANABI	CRUCITA	2019-01-01	62.7364415399919	2Coastal	3.33168277329994	5.5
2447	080755	25.4	1450	ESMERALDAS	ROCAFUERTE	2020-01-01	123.79427546302	2Coastal	3.3580901028061	5.5
2448	220351	24.6	3546	ORELLANA	ENOKANQUI	2018-01-01	75.6458968931888	3Amazonic	3.22192397122859	5.5
2449	131752	24.2	1006	MANABI	10 DE AGOSTO	2017-01-01	233.310892517321	2Coastal	3.1035296995631	5.5
3486	080262	25.8	2751	ESMERALDAS	COLON ELOY DEL MARIA	2019-01-01	71.5651489377928	2Coastal	3.37889462834699	5.5
3487	210158	24.5	3439	SUCUMBIOS	SANTA CECILIA	2018-01-01	232.803762617352	3Amazonic	3.2529156132224	5.5
3488	090550	25.1	1245	GUAYAS	COLIMES	2018-01-01	545.244005398063	2Coastal	2.96357374862566	5.5
3489	120754	24.3	2174	LOS RIOS	LOS ANGELES	2019-01-01	49.3610216110299	2Coastal	3.09019447786504	5.5
367	080558	25.8	2511	ESMERALDAS	SAN JAVIER DE CACHAVI (CAB. EN SAN JAVIER)	2019-01-01	41.7939819012811	2Coastal	3.43859713788821	5.5
368	210455	24.7	3546	SUCUMBIOS	SIETE DE JULIO	2018-01-01	123.655439713414	3Amazonic	3.25795991804598	5.5
369	120152	25.3	1893	LOS RIOS	CARACOL	2020-01-01	97.9172311013292	2Coastal	3.07370258795874	5.5
1410	080263	25.8	3090	ESMERALDAS	SAN JOSE DE CAYAPAS	2019-01-01	120.639109410621	2Coastal	3.21644544440336	5.4
1411	010559	15.1	809	AZUAY	SAN CRISTOBAL (CARLOS ORDOÑEZ LAZO)	2017-01-01	17.1499931303464	1Highlands	3.16269829287363	5.4
1412	110161	19.5	896	LOJA	VILCABAMBA (VICTORIA)	2018-01-01	159.326090404878	1Highlands	3.17027661609262	5.4
1413	111050	22.2	1675	LOJA	ALAMOR	2019-01-01	238.931790843548	1Highlands	2.97721321589055	5.4
1414	140251	16.5	1377	MORONA SANTIAGO	AMAZONAS (ROSARIO DE CUYES)	2018-01-01	287.548665009796	3Amazonic	3.05820462260744	5.4
2450	080354	24.6	1485	ESMERALDAS	QUINGUE (OLMEDO PERDOMO FRANCO)	2020-01-01	28.0758672944357	2Coastal	3.80696881778412	5.4
2451	071050	21.9	1538	EL ORO	PIÑAS	2018-01-01	121.740753007581	2Coastal	2.99580753444311	5.4
2452	110250	19.2	1101	LOJA	CARIAMANGA	2018-01-01	373.740811152576	1Highlands	3.08845298866309	5.4
2453	111551	16.5	1169	LOJA	FUNDOCHAMBA	2017-01-01	35.9738305530367	1Highlands	3.40856717265458	5.4
2454	190950	19.3	2702	ZAMORA CHINCHIPE	PAQUISHA	2019-01-01	166.382953793443	3Amazonic	3.25059726052475	5.4
3490	220152	24.6	3318	ORELLANA	TARACOA (NUEVA ESPERANZA: YUCA)	2019-01-01	411.719561566775	3Amazonic	3.24981141923481	5.4
3491	090152	24.5	568	GUAYAS	JUAN GOMEZ RENDON (PROGRESO)	2020-01-01	322.752690370829	2Coastal	3.25937660958731	5.4
3492	110654	21.9	927	LOJA	27 DE ABRIL (CAB. EN LA NARANJA)	2019-01-01	41.2676168106058	1Highlands	3.28746951644155	5.4
3493	130156	23.6	1439	MANABI	SAN PLACIDO	2018-01-01	136.645155421396	2Coastal	3.1985492003335	5.4
3494	240151	24	181	SANTA ELENA	ATAHUALPA	2020-01-01	77.4800438822145	2Coastal	3.47248335632788	5.4
370	020155	13.9	1203	BOLIVAR	SALINAS	2019-01-01	469.496571079585	1Highlands	2.62665907337744	5.4
371	010153	15.4	716	AZUAY	CHAUCHA	2017-01-01	312.981986496953	1Highlands	3.21726474938722	5.4
372	090156	24.6	404	GUAYAS	POSORJA	2020-01-01	75.3183888740446	2Coastal	3.45894034211663	5.4
373	110751	18.8	1101	LOJA	CHANGAIMINA (LA LIBERTAD)	2018-01-01	120.435863375187	1Highlands	3.23340185831383	5.4
374	131952	24.4	285	MANABI	SALANGO	2019-01-01	89.2356521340681	2Coastal	3.44515185076447	5.4
375	150356	19	4256	NAPO	HATUN SUMAKU	2017-01-01	391.019368589893	3Amazonic	3.1617601752622	5.4
1415	020151	18.9	2192	BOLIVAR	FACUNDO VELA	2018-01-01	162.088958589001	1Highlands	3.09891581677535	5.3
1416	150454	14.7	1507	NAPO	SANTA ROSA	2018-01-01	306.199491757109	3Amazonic	3.26022163431087	5.3
1417	011550	20.7	883	AZUAY	CAMILO PONCE ENRIQUEZ	2019-01-01	268.892478768855	1Highlands	3.16511904257216	5.3
1418	091054	25.2	1340	GUAYAS	ROBERTO ASTUDILLO (CAB. EN CRUCE DE VENECIA)	2020-01-01	87.7732144770558	2Coastal	3.03997941939439	5.3
1419	110956	22.3	1612	LOJA	ORIANGA	2019-01-01	183.75337277801	1Highlands	3.03652620511445	5.3
1420	130552	24.3	1330	MANABI	ZAPALLO	2017-01-01	102.184896426218	2Coastal	3.2242469777981	5.3
1421	140750	21.9	3618	MORONA SANTIAGO	HUAMBOYA	2020-01-01	183.821924393194	3Amazonic	3.1713947730193	5.3
1422	210160	24.6	3356	SUCUMBIOS	10 DE AGOSTO	2018-01-01	50.2488257028431	3Amazonic	3.45216469210928	5.3
2455	080165	24.6	1169	ESMERALDAS	TABIAZO	2020-01-01	138.289250377004	2Coastal	3.13018367752226	5.3
2456	160350	21.6	4373	PASTAZA	SANTA CLARA	2019-01-01	243.480670306513	3Amazonic	3.03443158252071	5.3
2457	030750	15.1	797	CAÑAR	SUSCAL	2017-01-01	49.7875716841645	1Highlands	3.17582148288612	5.3
2458	091650	25.5	1072	GUAYAS	SAMBORONDON	2020-01-01	222.972067518289	2Coastal	2.9825583216087	5.3
2459	111153	18.1	718	LOJA	LLUZHAPA	2018-01-01	73.0372406717176	1Highlands	3.10968012604165	5.3
2460	131750	24	1629	MANABI	PEDERNALES	2017-01-01	766.016434246856	2Coastal	2.90680598352505	5.3
2461	190259	16.7	1139	ZAMORA CHINCHIPE	SAN ANDRES	2017-01-01	313.131768802138	3Amazonic	3.46472422188293	5.3
3495	080253	25.9	2604	ESMERALDAS	BORBON	2019-01-01	192.443014401919	2Coastal	3.17750803747439	5.3
3496	180253	15.1	1042	TUNGURAHUA	RIO VERDE	2017-01-01	246.267994069395	1Highlands	3.08233218480791	5.3
3497	070351	18.4	1233	EL ORO	AYAPAMBA	2017-01-01	101.830921808611	2Coastal	3.06557048985064	5.3
3498	092050	25.5	1072	GUAYAS	SAN JACINTO DE YAGUACHI	2020-01-01	272.555823133118	2Coastal	2.98996470778777	5.3
3499	130252	23.9	1381	MANABI	QUIROGA	2018-01-01	61.6235992498325	2Coastal	3.39279631336543	5.3
3500	140160	13.4	1888	MORONA SANTIAGO	ZUÑA (ZUÑAC)	2017-01-01	620.153320456703	3Amazonic	3.11577325467987	5.3
3501	190451	20	1898	ZAMORA CHINCHIPE	LA PAZ	2019-01-01	319.891235347836	3Amazonic	3.15276165641645	5.3
376	150451	19.1	3618	NAPO	GONZALO DIAZ DE PINEDA (EL BOMBON)	2017-01-01	1931.75958054042	3Amazonic	3.05800379276622	5.3
377	011450	15.2	1075	AZUAY	GUACHAPALA	2017-01-01	39.9759074429996	1Highlands	3.03268408196259	5.3
378	090153	24.6	423	GUAYAS	MORRO	2020-01-01	265.025132245782	2Coastal	3.17962012509166	5.3
379	110158	16.6	1153	LOJA	SAN PEDRO DE VILCABAMBA	2017-01-01	67.6661120490786	1Highlands	3.24647713262487	5.3
380	130353	24	1291	MANABI	CONVENTO	2017-01-01	303.804212875846	2Coastal	3.054696875569	5.3
381	140254	14.2	1025	MORONA SANTIAGO	CHIGUINDA	2017-01-01	218.732807430207	3Amazonic	3.11122550427583	5.3
382	190550	22.1	2216	ZAMORA CHINCHIPE	YANTZAZA (YANZATZA)	2019-01-01	271.679804320245	3Amazonic	2.88214350994352	5.3
1423	010556	13.8	1247	AZUAY	GUARAINAG	2017-01-01	36.2573302896089	1Highlands	3.17181936003376	5.2
1424	190250	20.8	1094	ZAMORA CHINCHIPE	ZUMBA	2018-01-01	426.196049033763	3Amazonic	3.12681848315452	5.2
2462	080260	25.6	2910	ESMERALDAS	SELVA ALEGRE	2019-01-01	49.2859211236652	2Coastal	3.13517229978758	5.2
2463	092053	25.4	1148	GUAYAS	GRAL. PEDRO J. MONTERO (BOLICHE)	2020-01-01	75.2837183926239	2Coastal	2.94870421357403	5.2
3502	080553	25.9	2577	ESMERALDAS	CALDERON	2019-01-01	24.5610630198114	2Coastal	3.33728173489901	5.2
3503	120555	24.8	2330	LOS RIOS	LA ESPERANZA	2020-01-01	28.9789974492509	2Coastal	3.21342419614771	5.2
383	080556	26	2467	ESMERALDAS	CONCEPCION	2019-01-01	212.08683351293	2Coastal	3.10681719404945	5.2
384	140256	20.1	2212	MORONA SANTIAGO	NUEVA TARQUI	2020-01-01	34.986465363568	3Amazonic	3.16740135266495	5.2
1425	170176	9.5	1115	PICHINCHA	PINTAG	2017-01-01	488.929464396593	1Highlands	2.59442619258939	5.1
1426	220455	20.5	4277	ORELLANA	SAN VICENTE DE HUATICOCHA	2018-01-01	191.755513468012	3Amazonic	3.10740092063993	5.1
1427	091051	25.4	1110	GUAYAS	CHOBO	2020-01-01	42.2890517452231	2Coastal	3.09408701004879	5.1
1428	110554	21.5	1351	LOJA	AMARILLOS	2019-01-01	21.5948739462357	1Highlands	3.20335554727121	5.1
1429	190151	22.1	1975	ZAMORA CHINCHIPE	CUMBARATZA	2019-01-01	169.481274656961	3Amazonic	2.90649832499557	5.1
2464	150354	22.2	4010	NAPO	SAN PABLO DE USHPAYACU	2019-01-01	152.429073317752	3Amazonic	3.11546468559313	5.1
2465	220154	24.6	3337	ORELLANA	EL DORADO	2019-01-01	132.87201666989	3Amazonic	3.02570075688568	5.1
2466	010360	14.3	816	AZUAY	SIMON BOLIVAR (CAB. EN GAÑANZOL)	2017-01-01	12.8964973728345	1Highlands	3.08623268671516	5.1
2467	110153	16.3	1009	LOJA	EL CISNE	2017-01-01	107.224346485688	1Highlands	3.08978719546157	5.1
2468	130352	25.4	1177	MANABI	CANUTO	2018-01-01	198.194093768063	2Coastal	2.91438106420425	5.1
2469	190850	17.3	1168	ZAMORA CHINCHIPE	PALANDA	2017-01-01	501.664762980645	3Amazonic	3.11199222516393	5.1
3504	160155	20.8	4397	PASTAZA	FATIMA	2019-01-01	81.8735811794712	3Amazonic	2.98683943960564	5.1
3505	220155	25.2	3049	ORELLANA	EL EDEN	2019-01-01	864.162416922726	3Amazonic	3.31587511976324	5.1
3506	071250	25.2	582	EL ORO	SANTA ROSA	2020-01-01	182.438865517912	2Coastal	2.93758208674278	5.1
3507	110155	16	1079	LOJA	JIMBILLA	2017-01-01	101.915956938943	1Highlands	3.12933827181548	5.1
3508	132050	24.3	697	MANABI	JAMA	2017-01-01	579.237888808158	2Coastal	2.94826098789828	5.1
3509	010854	15.3	628	AZUAY	SAN SALVADOR DE CAÑARIBAMBA	2017-01-01	81.4620225462311	1Highlands	3.14362722607481	5.1
385	160162	23.4	3576	PASTAZA	SIMON BOLIVAR (CAB. EN MUSHULLACTA)	2020-01-01	1021.83428057255	3Amazonic	2.90119850640027	5.1
386	220352	24.8	3328	ORELLANA	POMPEYA	2019-01-01	97.8288213552212	3Amazonic	3.20867968132487	5.1
387	090551	25	1105	GUAYAS	SAN JACINTO	2019-01-01	213.540502365287	2Coastal	3.01909758066336	5.1
388	110350	22.3	733	LOJA	CATAMAYO (LA TOMA)	2019-01-01	145.153366790519	1Highlands	2.90525086236418	5.1
389	190150	19.1	1436	ZAMORA CHINCHIPE	ZAMORA	2018-01-01	561.970441184811	3Amazonic	2.9673116040355	5.1
1430	220153	24.9	3186	ORELLANA	ALEJANDRO LABAKA	2019-01-01	974.768954329504	3Amazonic	3.12336188522915	5
1431	030351	17.7	922	CAÑAR	CHONTAMARCA	2018-01-01	214.937918693304	1Highlands	2.92766881896747	5
1432	111051	23.1	1480	LOJA	CIANO	2020-01-01	81.130236855388	1Highlands	3.09414543643866	5
1433	131550	25.1	598	MANABI	TOSAGUA	2018-01-01	249.68378967894	2Coastal	2.80600562694247	5
2470	220158	24.4	3232	ORELLANA	LA BELLEZA	2019-01-01	607.812895456417	3Amazonic	2.93939486840714	5
2471	070353	21.7	1533	EL ORO	MILAGRO	2018-01-01	3.02464444650715	2Coastal	3.22236086058879	5
2472	111252	19.6	1080	LOJA	TACAMOROS	2019-01-01	76.1426184490238	1Highlands	3.1072748261963	5
2473	131650	23.7	911	MANABI	SUCRE	2020-01-01	196.510103099651	2Coastal	2.77329078030324	5
3510	010158	15.6	791	AZUAY	NULTI	2017-01-01	27.0574380845524	1Highlands	2.98326366636137	5
3511	092750	24.4	2076	GUAYAS	GRAL. ANTONIO ELIZALDE (BUCAY)	2019-01-01	153.235211827161	2Coastal	2.73926488597313	5
3512	131353	24.9	1277	MANABI	LA UNION	2019-01-01	232.257587852956	2Coastal	3.0334813038448	5
390	080554	25.8	2551	ESMERALDAS	CARONDELET	2019-01-01	76.2031729840749	2Coastal	3.11333139324855	5
391	011350	11.1	1147	AZUAY	SEVILLA DE ORO	2019-01-01	64.4374471008367	1Highlands	3.19483492975509	5
392	110952	15.8	1268	LOJA	GUACHANAMA	2017-01-01	278.639274454058	1Highlands	2.96571983891119	5
393	131355	25.3	1351	MANABI	SAN PABLO (CAB EN PUEBLO NUEVO)	2019-01-01	213.033972494616	2Coastal	2.99836848073842	5
1434	080752	25.1	1954	ESMERALDAS	CHUMUNDE	2020-01-01	504.149888542715	2Coastal	2.98794271227531	4.9
1435	210652	24.3	3152	SUCUMBIOS	SEVILLA	2018-01-01	108.458701456735	3Amazonic	3.02318540557038	4.9
1436	110550	22.9	1448	LOJA	CHAGUARPAMBA	2019-01-01	101.382931448777	1Highlands	2.83994263204234	4.9
1437	120450	25.4	1872	LOS RIOS	PUEBLOVIEJO	2019-01-01	163.396755528423	2Coastal	2.74537731809422	4.9
2474	150157	16.5	1729	NAPO	TALAG	2017-01-01	916.21385984105	3Amazonic	2.8705863005449	4.9
2475	011253	12.8	1061	AZUAY	SAN VICENTE	2017-01-01	115.227856983668	1Highlands	2.96150166935349	4.9
2476	110553	23.3	1421	LOJA	SANTA RUFINA	2019-01-01	54.3855070973889	1Highlands	2.94819131634952	4.9
2477	130851	23.5	261	MANABI	SAN LORENZO	2019-01-01	61.1579643798894	2Coastal	3.34373633498626	4.9
3513	080352	25.1	1595	ESMERALDAS	DAULE	2019-01-01	98.3437692232084	2Coastal	2.98587147632905	4.9
3514	160450	23.4	3877	PASTAZA	ARAJUNO	2020-01-01	637.336249537413	3Amazonic	2.9661976703033	4.9
3515	011351	13.3	1565	AZUAY	AMALUZA	2017-01-01	180.141265044401	1Highlands	2.93537858007281	4.9
3516	110750	17	1179	LOJA	GONZANAMA	2017-01-01	72.8554734287391	1Highlands	2.9747285274374	4.9
3517	140455	21.9	3966	MORONA SANTIAGO	16 DE AGOSTO	2020-01-01	94.030304100714	3Amazonic	2.99138714505655	4.9
394	080358	25	1624	ESMERALDAS	SAN JOSE DE CHAMANGA	2019-01-01	146.010325591526	2Coastal	2.95348202407538	4.9
395	210351	25	3429	SUCUMBIOS	PALMA ROJA	2018-01-01	1153.96358612324	3Amazonic	3.16330681387947	4.9
396	090851	25.3	2057	GUAYAS	GUAYAS (PUEBLO NUEVO)	2018-01-01	404.426336912428	2Coastal	2.69322483001067	4.9
397	110754	16.2	1106	LOJA	PURUNUMA (EGUIGUREN)	2017-01-01	96.8464701255208	1Highlands	3.01223512959397	4.9
398	190352	20.9	1801	ZAMORA CHINCHIPE	NUEVO PARAISO	2019-01-01	919.458822515291	3Amazonic	3.06054319585103	4.9
1438	020551	18.5	1472	BOLIVAR	BALSAPAMBA	2017-01-01	116.984267472499	1Highlands	2.76101299111886	4.8
1439	050457	18.8	2325	COTOPAXI	TINGO	2018-01-01	194.5074637649	1Highlands	2.67632131192662	4.8
1440	160164	20.9	4404	PASTAZA	TENIENTE HUGO ORTIZ	2019-01-01	104.63707588503	3Amazonic	2.84433745954146	4.8
1441	030550	10.1	710	CAÑAR	EL TAMBO	2018-01-01	64.0309419395582	1Highlands	3.04144973579299	4.8
1442	092056	25.5	958	GUAYAS	VIRGEN DE FATIMA	2020-01-01	53.0273651531769	2Coastal	2.89500088919057	4.8
1443	131051	24.5	928	MANABI	CAMPOZANO (LA PALMA DE PAJAN)	2019-01-01	247.016046891392	2Coastal	2.89159206545314	4.8
1444	190952	20.8	2584	ZAMORA CHINCHIPE	NUEVO QUITO	2020-01-01	115.806222055009	3Amazonic	3.13958675530813	4.8
2478	020750	24.4	2187	BOLIVAR	LAS NAVES	2020-01-01	148.694355626172	1Highlands	2.8218817634535	4.8
2479	080555	25.2	2702	ESMERALDAS	5 DE JUNIO (CAB. EN UIMBI)	2019-01-01	211.725915707593	2Coastal	3.03020793552025	4.8
2480	160250	19.5	3615	PASTAZA	MERA	2019-01-01	359.897532240163	3Amazonic	2.82649103878258	4.8
2481	071152	15.8	892	EL ORO	MORALES	2017-01-01	77.5021786347396	2Coastal	3.03439863665648	4.8
2482	110151	16	987	LOJA	CHANTACO	2017-01-01	24.7822290624394	1Highlands	3.0467876011115	4.8
2483	140552	19.6	2724	MORONA SANTIAGO	CHUPIANZA	2020-01-01	100.637509319457	3Amazonic	3.00554959407575	4.8
3518	040156	23	3824	CARCHI	TOBAR DONOSO (LA BOCANA DE CAMUMBI)	2018-01-01	625.661704162903	1Highlands	3.02405693735287	4.8
3519	080559	25.5	2610	ESMERALDAS	SANTA RITA	2019-01-01	81.2539776420679	2Coastal	3.03071715595345	4.8
3520	080853	24.5	2786	ESMERALDAS	PLAN PILOTO	2019-01-01	82.7326235918879	2Coastal	2.97813479032984	4.8
3521	071356	22.9	1371	EL ORO	MALVAS	2020-01-01	13.5216759897651	2Coastal	3.05839377836706	4.8
3522	130653	23.3	533	MANABI	JULCUY	2018-01-01	304.643848981675	2Coastal	2.72098389052509	4.8
3523	190251	21	1307	ZAMORA CHINCHIPE	CHITO	2019-01-01	355.603825345074	3Amazonic	3.22011919526701	4.8
399	050250	23.9	2682	COTOPAXI	LA MANA	2018-01-01	229.078569860696	1Highlands	2.57861211877412	4.8
400	080753	25.6	1926	ESMERALDAS	LAGARTO	2019-01-01	212.737217794934	2Coastal	3.02188295969373	4.8
401	011250	15.2	1075	AZUAY	EL PAN	2018-01-01	17.2832652546204	1Highlands	2.95808692892064	4.8
402	092055	25.5	1027	GUAYAS	YAGUACHI VIEJO (CONE)	2020-01-01	108.71350294684	2Coastal	2.82673148985174	4.8
403	130952	23.7	420	MANABI	LA PILA	2019-01-01	98.4654576176363	2Coastal	3.06334838425946	4.8
404	190254	22.8	1304	ZAMORA CHINCHIPE	LA CHONTA	2020-01-01	18.2959817445794	3Amazonic	3.45613598040284	4.8
1445	210152	24.8	3552	SUCUMBIOS	DURENO	2018-01-01	251.355359148205	3Amazonic	2.84444219417701	4.7
1446	071355	17.7	1024	EL ORO	HUERTAS	2018-01-01	47.090026822844	2Coastal	2.88332939135239	4.7
1447	121051	24.4	2643	LOS RIOS	PATRICIA PILAR	2019-01-01	166.223704846938	2Coastal	2.83475426013901	4.7
1448	131351	24.8	1031	MANABI	AYACUCHO	2019-01-01	109.463849104118	2Coastal	2.88086809471714	4.7
1449	240156	23.9	166	SANTA ELENA	SAN JOSE DE ANCON	2020-01-01	66.3031286322062	2Coastal	3.17282493058254	4.7
2484	050252	16.3	2126	COTOPAXI	PUCAYACU	2018-01-01	180.651030955216	1Highlands	2.67207237948736	4.7
2485	210156	24.8	3562	SUCUMBIOS	PACAYACU	2018-01-01	874.201509680111	3Amazonic	2.93408010514041	4.7
2486	110552	23.2	1439	LOJA	EL ROSARIO	2020-01-01	91.9117549371997	1Highlands	2.90185987603821	4.7
2487	121250	25.3	1869	LOS RIOS	MOCACHE	2018-01-01	568.077383799358	2Coastal	2.55365123258342	4.7
2488	140252	13.6	886	MORONA SANTIAGO	BERMEJOS	2017-01-01	166.715015090947	3Amazonic	2.87467428481437	4.7
3524	080557	25.3	3018	ESMERALDAS	MATAJE (CAB. EN SANTANDER)	2019-01-01	292.585910730837	2Coastal	3.12307688895232	4.7
3525	220160	24.1	3388	ORELLANA	SAN JOSE DE GUAYUSA	2019-01-01	458.885528077174	3Amazonic	2.88592361084653	4.7
3526	110958	22.2	1377	LOJA	CASANGA	2019-01-01	52.319040750101	1Highlands	2.78983312901523	4.7
3527	130152	24.9	972	MANABI	ALHAJUELA (BAJO GRANDE)	2019-01-01	24.4189735982726	2Coastal	3.0030802602796	4.7
3528	140850	19.7	2422	MORONA SANTIAGO	SAN JUAN BOSCO	2019-01-01	153.723856912102	3Amazonic	2.72385396447498	4.7
405	160351	21.2	4450	PASTAZA	SAN JOSE	2019-01-01	69.046363270847	3Amazonic	2.90092464392636	4.7
406	071354	16.5	885	EL ORO	GUIZHAGUIÑA	2017-01-01	157.477682827547	2Coastal	2.80252174530178	4.7
407	120851	25.3	1280	LOS RIOS	ANTONIO SOTOMAYOR (CAB. EN PLAYAS DE VINCES)	2019-01-01	142.39166160993	2Coastal	2.77473575381768	4.7
408	130356	23.3	1617	MANABI	RICAURTE	2017-01-01	362.10147152451	2Coastal	2.84054305073743	4.7
409	190256	22.8	1304	ZAMORA CHINCHIPE	PUCAPAMBA	2020-01-01	22.1370305402618	3Amazonic	3.3920283205986	4.7
1450	080562	25.3	2623	ESMERALDAS	URBINA	2019-01-01	146.170190640408	2Coastal	2.91216046657647	4.6
1451	090850	25.6	1847	GUAYAS	VELASCO IBARRA (CAB. EL EMPALME)	2017-01-01	174.126788944686	2Coastal	2.51862623580048	4.6
1452	120250	25.3	1250	LOS RIOS	BABA	2018-01-01	172.303306804369	2Coastal	2.57108297541613	4.6
1453	240152	24.5	359	SANTA ELENA	COLONCHE	2019-01-01	1150.48217463989	2Coastal	2.69135984896982	4.6
2489	020553	18.6	1378	BOLIVAR	REGULO DE MORA	2018-01-01	69.6291641638441	1Highlands	2.74677567729368	4.6
2490	170750	21.7	3093	PICHINCHA	SAN MIGUEL DE LOS BANCOS	2017-01-01	581.405848593044	1Highlands	2.58922635936016	4.6
2491	110354	20.4	942	LOJA	ZAMBI	2019-01-01	49.6263674328962	1Highlands	2.8688626023276	4.6
2492	131753	24.4	1177	MANABI	ATAHUALPA	2018-01-01	168.716789114623	2Coastal	2.92394171097952	4.6
3529	050351	22.5	2278	COTOPAXI	MORASPUNGO	2018-01-01	436.745196868504	1Highlands	2.50667032569224	4.6
3530	070254	25.5	646	EL ORO	PALMALES	2020-01-01	214.182419182979	2Coastal	2.85747280137513	4.6
3531	110850	23.2	892	LOJA	MACARA	2020-01-01	370.918866340076	1Highlands	2.7224573930488	4.6
3532	140854	21.3	2586	MORONA SANTIAGO	SANTIAGO DE PANANZA	2020-01-01	88.8993121231845	3Amazonic	2.81927621099899	4.6
410	080561	25.4	2756	ESMERALDAS	TULULBI (CAB. EN RICAURTE)	2019-01-01	351.91373527898	2Coastal	2.93663680755066	4.6
411	090650	25.4	860	GUAYAS	DAULE	2019-01-01	213.479868476915	2Coastal	2.55629523803881	4.6
412	111651	20.4	987	LOJA	LA TINGUE	2019-01-01	51.4998419792928	1Highlands	2.88686357142216	4.6
413	141150	14.7	1690	MORONA SANTIAGO	PABLO SEXTO	2017-01-01	1387.26966568429	3Amazonic	2.754354094572	4.6
1454	160157	21.5	4257	PASTAZA	POMONA	2020-01-01	55.3401236157114	3Amazonic	2.80423789343631	4.5
1455	010953	13.5	811	AZUAY	GUEL	2017-01-01	14.3556375264152	1Highlands	2.89377361300462	4.5
1457	111451	21.4	1506	LOJA	CHAQUINAL	2020-01-01	17.2670549247033	1Highlands	2.8649141747863	4.5
1458	131651	24.2	1281	MANABI	BELLAVISTA	2019-01-01	103.151947694991	2Coastal	2.78763343331687	4.5
2493	080153	24.1	1545	ESMERALDAS	CRNEL. CARLOS CONCHA TORRES (CAB. EN HUELE)	2020-01-01	291.354743406133	2Coastal	2.76176749958287	4.5
2494	180750	15.5	736	TUNGURAHUA	PELILEO	2017-01-01	56.5871750989171	1Highlands	2.44599765236957	4.5
2495	011152	15.2	836	AZUAY	LA UNION	2018-01-01	14.315120191283	1Highlands	3.0201952080064	4.5
2497	120251	25.4	1555	LOS RIOS	GUARE	2019-01-01	234.158914414575	2Coastal	2.58400875076378	4.5
2498	140851	21	2465	MORONA SANTIAGO	PAN DE AZUCAR	2020-01-01	84.2447112702531	3Amazonic	2.83316816730023	4.5
3533	080353	24.6	1413	ESMERALDAS	GALERA	2020-01-01	67.9193853416731	2Coastal	3.1875087433381	4.5
3534	220350	24.7	3467	ORELLANA	LA JOYA DE LOS SACHAS	2018-01-01	195.494203847601	3Amazonic	2.65947022303177	4.5
3535	030363	20.7	1306	CAÑAR	DUCUR	2019-01-01	87.1494449252391	1Highlands	2.78494188778265	4.5
3537	120350	25.1	1968	LOS RIOS	MONTALVO	2020-01-01	297.215701217385	2Coastal	2.60677086845321	4.5
3538	190158	20.3	2122	ZAMORA CHINCHIPE	SAN CARLOS DE LAS MINAS	2019-01-01	148.836930383979	3Amazonic	2.78103571486504	4.5
414	080550	25.9	2601	ESMERALDAS	SAN LORENZO	2019-01-01	235.842030084159	2Coastal	2.83440303248392	4.5
415	900151	24.1	2927	IMBABURA	LAS GOLONDRINAS	2019-01-01	127.91810367864	1Highlands	2.74706259298625	4.5
417	091450	24.8	801	GUAYAS	PEDRO CARBO	2019-01-01	515.123088065879	2Coastal	2.68416274799401	4.5
418	130151	25	817	MANABI	ABDON CALDERON (SAN FRANCISCO)	2019-01-01	124.102814886157	2Coastal	2.76611382268318	4.5
419	190851	16.1	1326	ZAMORA CHINCHIPE	EL PORVENIR DEL CARMEN	2017-01-01	528.471675635551	3Amazonic	2.91074120929015	4.5
1459	060554	13.9	727	CHIMBORAZO	LLAGOS	2017-01-01	66.9573394473179	1Highlands	2.78438035935336	4.4
1460	180251	16.6	1101	TUNGURAHUA	LLIGUA	2018-01-01	10.1795512381606	1Highlands	2.94423175821895	4.4
1461	030450	24.9	1809	CAÑAR	LA TRONCAL	2018-01-01	120.765937549165	1Highlands	2.70643715927037	4.4
1462	091952	25.4	1171	GUAYAS	LA VICTORIA (ÑAUZA)	2020-01-01	81.5885843056987	2Coastal	2.72099296396702	4.4
1463	130350	24.3	1638	MANABI	CHONE	2019-01-01	829.255693772555	2Coastal	2.45814087555219	4.4
1464	900351	24.9	2237	MANABI	MANGA DEL CURA	2019-01-01	482.967281139763	2Coastal	2.66406235995142	4.4
2499	080751	25.2	1521	ESMERALDAS	CHONTADURO	2020-01-01	216.90559204461	2Coastal	2.67480237835957	4.4
2500	220358	24.7	3368	ORELLANA	UNION MILAGREÑA	2019-01-01	137.44129627161	3Amazonic	2.79223749711146	4.4
2501	071053	22.6	1438	EL ORO	MOROMORO (CAB. EN EL VADO)	2019-01-01	85.596613799181	2Coastal	2.72360510585071	4.4
2502	110651	21.2	919	LOJA	BELLAVISTA	2019-01-01	77.3885385320502	1Highlands	2.85796312344152	4.4
2503	131352	24.5	1346	MANABI	HONORATO VASQUEZ (CAB EN VASQUEZ)	2019-01-01	156.606571996521	2Coastal	2.78407437642435	4.4
3539	170181	14.1	1213	PICHINCHA	SAN JOSE DE MINAS	2017-01-01	307.1445198017	1Highlands	2.78402938736523	4.4
3540	010550	15.6	917	AZUAY	PAUTE	2017-01-01	51.1604389116847	1Highlands	2.64699750267096	4.4
3541	090158	25.3	748	GUAYAS	TENGUEL	2017-01-01	138.853054029736	2Coastal	3.17225070580935	4.4
3542	111650	20.7	1131	LOJA	OLMEDO	2019-01-01	60.7971011583879	1Highlands	2.74518998803133	4.4
3543	131453	24.5	455	MANABI	CHARAPOTO	2019-01-01	215.747586483596	2Coastal	2.76934650660742	4.4
420	170950	24.8	2877	PICHINCHA	PUERTO QUITO	2018-01-01	694.590238859631	1Highlands	2.48119689905347	4.4
421	010561	13.9	1040	AZUAY	TOMEBAMBA	2017-01-01	38.7049888693004	1Highlands	2.8237866243233	4.4
422	091050	25.2	1267	GUAYAS	MILAGRO	2020-01-01	220.623621956842	2Coastal	2.58980889768367	4.4
423	120850	25.4	1519	LOS RIOS	VINCES	2018-01-01	554.314917965487	2Coastal	2.53898567268423	4.4
424	140451	21.1	3736	MORONA SANTIAGO	ARAPICOS	2020-01-01	216.072748623883	3Amazonic	2.87349439169334	4.4
1465	080351	25.1	1637	ESMERALDAS	BOLIVAR	2020-01-01	44.177540574317	2Coastal	2.85733829583744	4.3
1466	210452	25.1	3059	SUCUMBIOS	PAÑACOCHA	2019-01-01	632.041019122536	3Amazonic	2.89847252320406	4.3
1467	010452	14.3	586	AZUAY	EL PROGRESO (CAB. EN ZHOTA)	2017-01-01	157.99087761952	1Highlands	2.7225147158657	4.3
1468	071150	23.5	1293	EL ORO	PORTOVELO	2020-01-01	38.3715372105088	2Coastal	2.70890789137608	4.3
1469	091451	25	976	GUAYAS	VALLE DE LA VIRGEN	2019-01-01	101.171058869567	2Coastal	2.59183979856082	4.3
1470	131054	24.4	1220	MANABI	LASCANO	2019-01-01	143.954612823519	2Coastal	2.67165382921124	4.3
1471	240150	24	230	SANTA ELENA	SANTA ELENA	2020-01-01	537.729670052373	2Coastal	2.7739272959056	4.3
2504	020355	18.5	1543	BOLIVAR	TELIMBELA	2020-01-01	158.180219902111	1Highlands	2.67200800514895	4.3
2505	080451	23.7	1974	ESMERALDAS	CUBE	2019-01-01	699.472381718287	2Coastal	2.65526418279351	4.3
2506	220354	24.4	3550	ORELLANA	SAN SEBASTIAN DEL COCA	2019-01-01	283.234117301992	3Amazonic	2.65275359043067	4.3
2507	070350	18.2	1085	EL ORO	PACCHA	2018-01-01	46.6899214719831	2Coastal	2.70516220971041	4.3
2508	071357	22.5	1411	EL ORO	MULUNCAY GRANDE	2020-01-01	7.03578568383687	2Coastal	2.78688895104263	4.3
2509	091951	25.3	1179	GUAYAS	GRAL. VERNAZA (DOS ESTEROS)	2018-01-01	83.1507394124873	2Coastal	2.43618996467243	4.3
2510	131652	23.8	1163	MANABI	NOBOA	2019-01-01	146.075275117938	2Coastal	2.64247437732877	4.3
2511	111450	22.6	1199	LOJA	PINDAL	2019-01-01	50.7611236755953	1Highlands	2.65022502560445	4.3
3544	050353	16.2	2030	COTOPAXI	RAMON CAMPAÑA	2017-01-01	92.3428991151224	1Highlands	2.76924490071602	4.3
3545	160163	21.4	4348	PASTAZA	TARQUI	2020-01-01	87.8077046504646	3Amazonic	2.67486032140407	4.3
3546	010156	15.1	800	AZUAY	LLACAO	2017-01-01	17.0753702990947	1Highlands	2.63825747639232	4.3
3547	070550	20.1	1101	EL ORO	CHILLA	2019-01-01	331.424910227917	2Coastal	2.65953406528652	4.3
3548	091250	25	1602	GUAYAS	NARANJITO	2020-01-01	224.833665258736	2Coastal	2.57697367659552	4.3
3549	110954	18.2	1329	LOJA	LAURO GUERRERO	2018-01-01	98.6155609879225	1Highlands	2.69643841436363	4.3
3550	190252	22.6	1333	ZAMORA CHINCHIPE	EL CHORRO	2020-01-01	14.8479057002715	3Amazonic	3.12709169236227	4.3
425	060256	14.3	737	CHIMBORAZO	PISTISHI (NARIZ DEL DIABLO)	2017-01-01	7.13680508845748	1Highlands	2.79550341737823	4.3
426	210450	24.8	3467	SUCUMBIOS	SHUSHUFINDI	2018-01-01	449.264783735042	3Amazonic	2.58707307959647	4.3
427	010251	19.2	627	AZUAY	ASUNCION	2019-01-01	58.1469541396233	1Highlands	2.7194959343425	4.3
428	070955	22.9	1075	EL ORO	UZHCURRUMI	2020-01-01	30.863796267758	2Coastal	2.73073379994899	4.3
429	091350	25.2	1099	GUAYAS	PALESTINA	2019-01-01	193.620143580685	2Coastal	2.64086827733153	4.3
430	111251	20.7	1131	LOJA	NUEVA FATIMA	2020-01-01	46.4490626055076	1Highlands	2.93689767068484	4.3
431	190351	21.7	2219	ZAMORA CHINCHIPE	ZURMI	2020-01-01	915.1142116519	3Amazonic	2.86023464383893	4.3
1472	080452	25.4	2188	ESMERALDAS	CHURA (CHANCAMA) (CAB. EN EL YERBERO)	2020-01-01	219.771983482958	2Coastal	2.69769268554955	4.2
1474	220356	24.4	3620	ORELLANA	RUMIPAMBA	2019-01-01	72.9151103115867	3Amazonic	2.80022765608159	4.2
1475	090852	25.6	1694	GUAYAS	EL ROSARIO	2018-01-01	137.551047814833	2Coastal	2.70961240758438	4.2
1476	110957	22.1	1202	LOJA	SAN ANTONIO	2019-01-01	35.3939985658769	1Highlands	2.60471879167358	4.2
1477	130154	24.5	787	MANABI	PUEBLO NUEVO	2019-01-01	36.5687618747415	2Coastal	2.74993667757691	4.2
1478	131053	24.5	1044	MANABI	GUALE	2019-01-01	114.867103999801	2Coastal	2.65117314029139	4.2
1479	190852	18.2	1288	ZAMORA CHINCHIPE	SAN FRANCISCO DEL VERGEL	2018-01-01	203.161391917045	3Amazonic	2.88224258965917	4.2
2512	160251	21.5	4204	PASTAZA	MADRE TIERRA	2020-01-01	132.171184520285	3Amazonic	2.63548538995928	4.2
2514	230157	23.2	2688	SANTO DOMINGO DE LOS TSACHILAS	SANTA MARIA DEL TOACHI	2018-01-01	353.470640328323	2Coastal	2.48057747159805	4.2
2515	110163	15.7	1203	LOJA	QUINARA	2017-01-01	147.655731400029	1Highlands	2.77600815300528	4.2
2516	111052	21.8	1604	LOJA	EL ARENAL	2020-01-01	28.6077505638886	1Highlands	2.80497756162931	4.2
2517	130155	25.1	537	MANABI	RIOCHICO (RIO CHICO)	2019-01-01	82.8726235858798	2Coastal	2.67915121003714	4.2
2518	131551	25.7	839	MANABI	BACHILLERO	2019-01-01	59.4133476210152	2Coastal	2.66176353404622	4.2
2519	080850	24.5	2751	ESMERALDAS	LA CONCORDIA	2019-01-01	81.3682817434316	2Coastal	2.4074276117735	4.2
3551	050554	10.5	679	COTOPAXI	MULLIQUINDIL (SANTA ANA)	2018-01-01	48.1193491908213	1Highlands	2.25910753159045	4.2
3552	170172	19.8	2651	PICHINCHA	PACTO	2017-01-01	345.598212905274	1Highlands	2.66914386235814	4.2
3554	011051	17.9	811	AZUAY	SUSUDEL	2019-01-01	72.4770169023058	1Highlands	2.7134328053681	4.2
3555	110254	20.1	990	LOJA	SANGUILLIN	2019-01-01	98.6719625107832	1Highlands	2.82721994045385	4.2
3556	111055	20.6	1536	LOJA	VICENTINO	2019-01-01	56.7962620301985	1Highlands	2.70060940461872	4.2
3557	130250	24.8	1353	MANABI	CALCETA	2018-01-01	355.677807196953	2Coastal	2.45686454926165	4.2
3558	131751	24.8	1564	MANABI	COJIMIES	2019-01-01	736.938011931452	2Coastal	2.63576072503529	4.2
3559	190753	21.9	2117	ZAMORA CHINCHIPE	PANGUINTZA	2020-01-01	44.7299948394641	3Amazonic	2.74238861149698	4.2
432	080356	24.9	1647	ESMERALDAS	SAN FRANCISCO	2020-01-01	189.403984320936	2Coastal	2.89854453137214	4.2
434	180151	13	551	TUNGURAHUA	AMBATILLO	2018-01-01	12.4120377337722	1Highlands	2.84539875027928	4.2
435	030353	16.6	861	CAÑAR	GENERAL MORALES (SOCARTE)	2018-01-01	114.080143784619	1Highlands	2.63722375079423	4.2
436	110652	16	1219	LOJA	JIMBURA	2017-01-01	96.419082150675	1Highlands	2.82974611265438	4.2
437	120452	25.4	1687	LOS RIOS	SAN JUAN	2020-01-01	90.9658969311553	2Coastal	2.59807500518731	4.2
438	130950	24.6	280	MANABI	MONTECRISTI	2019-01-01	653.759650226983	2Coastal	2.53143019117042	4.2
439	140550	17.2	2577	MORONA SANTIAGO	SANTIAGO DE MENDEZ	2019-01-01	299.790987693705	3Amazonic	2.5848077236558	4.2
440	080455	24.9	2348	ESMERALDAS	LA UNION	2018-01-01	655.531117939651	2Coastal	2.43467259518121	4.2
1480	040159	19.9	2556	CARCHI	EL CHICAL	2017-01-01	437.678325095736	1Highlands	2.7717013200011	4.1
1481	210451	24.8	3255	SUCUMBIOS	LIMONCOCHA	2019-01-01	598.602283597536	3Amazonic	2.67687112167669	4.1
1483	220454	24.2	3196	ORELLANA	SAN JOSE DE DAHUANO	2020-01-01	501.216047403402	3Amazonic	2.68944269294065	4.1
1484	071151	20.9	1237	EL ORO	CURTINCAPA	2019-01-01	19.6969065766247	2Coastal	2.69320805739156	4.1
1485	110655	20.3	940	LOJA	EL INGENIO	2019-01-01	72.3992344005106	1Highlands	2.65317465751137	4.1
1486	140255	19.8	2228	MORONA SANTIAGO	EL ROSARIO	2020-01-01	97.286701314795	3Amazonic	2.601866837262	4.1
2520	080450	24.9	2254	ESMERALDAS	ROSA ZARATE (QUININDE)	2020-01-01	1040.68834153866	2Coastal	2.30043496873361	4.1
2521	210553	18.9	2050	SUCUMBIOS	ROSA FLORIDA	2017-01-01	355.923158964275	3Amazonic	2.75807204067006	4.1
2523	080652	24.9	1331	ESMERALDAS	SUA (CAB. EN LA BOCANA)	2020-01-01	70.8938073771759	2Coastal	2.68870484008277	4.1
2524	071452	23.3	1343	EL ORO	EL PARAISO	2020-01-01	77.354373709426	2Coastal	2.63956943042663	4.1
2525	130150	25.4	427	MANABI	PORTOVIEJO	2020-01-01	418.513122337678	2Coastal	2.30446491426238	4.1
2526	190450	20.3	1748	ZAMORA CHINCHIPE	28 DE MAYO (SAN JOSE DE YACUAMBI)	2020-01-01	483.949728734233	3Amazonic	2.54120480536286	4.1
3560	100155	20.4	1991	IMBABURA	LITA	2017-01-01	201.360215944749	1Highlands	2.67628047529165	4.1
3561	220161	24.6	3338	ORELLANA	SAN LUIS DE ARMENIA	2020-01-01	318.35318165115	3Amazonic	2.66423204228235	4.1
3563	070251	25.5	410	EL ORO	CHACRAS	2020-01-01	120.583130323871	2Coastal	2.85065620726848	4.1
3564	090656	25.2	870	GUAYAS	LOS LOJAS (ENRIQUE BAQUERIZO MORENO)	2020-01-01	118.507746761444	2Coastal	2.6290288846351	4.1
3565	130452	24.7	2469	MANABI	SAN PEDRO DE SUMA	2018-01-01	189.098902574492	2Coastal	2.52528209132224	4.1
3566	080265	25.8	2148	ESMERALDAS	SANTA LUCIA DE LAS PEÑAS	2019-01-01	90.6113109348044	2Coastal	2.66584693164724	4.1
441	150155	22.5	3956	NAPO	PUERTO MISAHUALLI	2019-01-01	347.934013741242	3Amazonic	2.50271861898687	4.1
443	220452	24.4	3231	ORELLANA	PUERTO MURIALDO	2020-01-01	193.32766552957	3Amazonic	2.65935592799902	4.1
444	070355	22.6	1273	EL ORO	SAN JUAN DE CERRO AZUL	2020-01-01	93.906814342567	2Coastal	2.63470717422079	4.1
445	110653	18.1	1097	LOJA	SANTA TERESITA	2018-01-01	77.2340783735341	1Highlands	2.76355744762994	4.1
446	131457	24.2	713	MANABI	SAN ISIDRO	2017-01-01	278.124080720836	2Coastal	2.47407779511935	4.1
453	120753	22.7	1933	LOS RIOS	CHACARITA	2019-01-01	67.1980965333639	2Coastal	2.59374219205724	4.1
1493	060255	14.4	780	CHIMBORAZO	MULTITUD	2017-01-01	102.672412233698	1Highlands	2.59115029130388	4
1494	220357	24.5	3627	ORELLANA	TRES DE NOVIEMBRE	2019-01-01	124.079851226756	3Amazonic	2.66472793105996	4
1495	070250	25.5	563	EL ORO	ARENILLAS	2020-01-01	393.824110571816	2Coastal	2.47341669072851	4
1496	091953	25.3	1112	GUAYAS	JUNQUILLAL	2019-01-01	97.6800553768206	2Coastal	2.45861881630034	4
1497	120651	25.2	2081	LOS RIOS	RICAURTE	2020-01-01	329.843508090791	2Coastal	2.41813136643765	4
1498	140651	19.6	2728	MORONA SANTIAGO	ASUNCION	2020-01-01	200.291557351608	3Amazonic	2.45228343929113	4
2533	080159	24.4	1805	ESMERALDAS	MAJUA	2020-01-01	130.903687114182	2Coastal	2.59533420570794	4
2534	010157	16.9	782	AZUAY	MOLLETURO	2020-01-01	977.081212636694	1Highlands	2.52975585420776	4
2535	071153	20.4	1078	EL ORO	SALATI	2019-01-01	150.177235556719	2Coastal	2.58018424598982	4
2536	110156	18.7	968	LOJA	MALACATOS (VALLADOLID)	2018-01-01	205.918836444199	1Highlands	2.51474725868743	4
2537	132251	24.3	513	MANABI	CANOA	2018-01-01	386.211162538017	2Coastal	2.69544582849294	4
2538	190553	20.9	2739	ZAMORA CHINCHIPE	LOS ENCUENTROS	2020-01-01	475.828042215437	3Amazonic	2.45669973519016	4
3573	080261	23.8	2562	ESMERALDAS	TELEMBI	2019-01-01	1282.06525610084	2Coastal	2.55922574679025	4
3574	010954	13.8	674	AZUAY	LUDO	2017-01-01	77.4825269891934	1Highlands	2.59969462001091	4
3575	071353	15	778	EL ORO	GUANAZAN	2017-01-01	192.940848439285	2Coastal	2.58212999477761	4
3576	110252	20	1002	LOJA	EL LUCERO	2019-01-01	51.6081565089018	1Highlands	2.69516339788787	4
3577	140250	19.8	2603	MORONA SANTIAGO	GUALAQUIZA	2019-01-01	381.407107869815	3Amazonic	2.37376239272767	4
454	080357	24.9	1761	ESMERALDAS	SAN GREGORIO	2019-01-01	448.658822290396	2Coastal	2.38001179751477	4
455	030253	13.4	788	CAÑAR	TURUPAMBA	2017-01-01	5.87643333890387	1Highlands	2.75213420316238	4
456	091850	25.3	952	GUAYAS	SANTA LUCIA	2019-01-01	357.863164355174	2Coastal	2.41098315150914	4
457	120451	25.4	1991	LOS RIOS	PUERTO PECHICHE	2020-01-01	81.1668096842774	2Coastal	2.50792073936753	4
458	140350	16.7	1720	MORONA SANTIAGO	GRAL. LEONIDAS PLAZA GUTIERREZ	2018-01-01	291.310690863317	3Amazonic	2.43888729479537	4
1499	150151	23.8	3590	NAPO	AHUANO	2020-01-01	416.362591022061	3Amazonic	2.53627855433619	3.9
1500	010652	19.2	760	AZUAY	SAN RAFAEL DE SHARUG	2019-01-01	69.2411083570364	1Highlands	2.74597533090526	3.9
1501	110851	20.6	1181	LOJA	LARAMA	2020-01-01	93.3840479950929	1Highlands	2.62153219691597	3.9
1502	131150	25.2	1698	MANABI	PICHINCHA	2019-01-01	505.5988319158	2Coastal	2.46702639191557	3.9
1503	140452	18.6	2677	MORONA SANTIAGO	CUMANDA (CAB EN COLONIA AGRICOLA SEVILLA DEL ORO)	2019-01-01	824.332480141955	3Amazonic	2.46783870923609	3.9
2539	180252	16.5	1529	TUNGURAHUA	RIO NEGRO	2020-01-01	628.339063257303	1Highlands	2.50232940614158	3.9
2540	030154	15.4	805	CAÑAR	JAVIER LOYOLA (CHUQUIPATA)	2020-01-01	29.034532012323	1Highlands	2.25957784909327	3.9
2541	130357	25.1	829	MANABI	SAN ANTONIO	2018-01-01	210.227540183943	2Coastal	2.38265773987214	3.9
2542	131950	23.1	419	MANABI	PUERTO LOPEZ	2019-01-01	200.465738482838	2Coastal	2.59000321551345	3.9
2543	190951	19.7	2747	ZAMORA CHINCHIPE	BELLAVISTA	2020-01-01	57.0164641222034	3Amazonic	2.77010170771213	3.9
3578	080258	25.7	2814	ESMERALDAS	SAN FRANCISCO DE ONZOLE	2020-01-01	165.254993903695	2Coastal	2.61544715901719	3.9
3579	210453	25	3248	SUCUMBIOS	SAN ROQUE (CAB. EN SAN VICENTE)	2019-01-01	644.191982242226	3Amazonic	2.67963524224579	3.9
3580	030158	14.6	814	CAÑAR	SAN MIGUEL	2017-01-01	28.7952917676264	1Highlands	2.46168156913573	3.9
3581	130652	23.2	920	MANABI	EL ANEGADO (CAB. EN ELOY ALFARO)	2019-01-01	117.141432248432	2Coastal	2.59159652493534	3.9
3582	140151	18.3	2538	MORONA SANTIAGO	ALSHI (CAB EN 9 DE OCTUBRE)	2020-01-01	273.567431568929	3Amazonic	2.45360326961163	3.9
459	080653	25	1392	ESMERALDAS	TONCHIGUE	2020-01-01	134.251527814466	2Coastal	2.62977253996105	3.9
460	010554	14.4	824	AZUAY	EL CABO	2017-01-01	22.4441258782799	1Highlands	2.4811512081984	3.9
461	030651	14.1	809	CAÑAR	SOLANO	2017-01-01	14.9599961081111	1Highlands	2.58721887755144	3.9
462	130654	23.2	1136	MANABI	LA UNION	2019-01-01	46.6807386143927	2Coastal	2.56978351264776	3.9
463	140358	16.7	1932	MORONA SANTIAGO	YUNGANZA (CAB EN EL ROSARIO)	2019-01-01	223.781702205291	3Amazonic	2.48871488284943	3.9
1504	210153	24.6	3528	SUCUMBIOS	GENERAL FARFAN	2018-01-01	517.313046091897	3Amazonic	2.55485858722632	3.8
1505	071453	22.9	1386	EL ORO	SAN ISIDRO	2019-01-01	29.3976277693829	2Coastal	2.55685601241978	3.8
1506	111159	13.2	735	LOJA	URDANETA (PAQUISHAPA)	2017-01-01	117.333618520349	1Highlands	2.51394169112648	3.8
1507	190152	22.2	1988	ZAMORA CHINCHIPE	GUADALUPE	2020-01-01	244.10428875919	3Amazonic	2.41525051324478	3.8
2544	010851	21.3	679	AZUAY	ABDON CALDERON (LA UNION)	2020-01-01	59.9393976905427	1Highlands	2.53696385481234	3.8
2545	091452	24.9	786	GUAYAS	SABANILLA	2020-01-01	319.180613389997	2Coastal	2.5255105278293	3.8
2546	140351	22	2440	MORONA SANTIAGO	INDANZA	2020-01-01	72.0040234719412	3Amazonic	2.39769285522738	3.8
2547	190153	16.7	1268	ZAMORA CHINCHIPE	IMBANA (LA VICTORIA DE IMBANA)	2018-01-01	338.706718917414	3Amazonic	2.46838261839235	3.8
3583	060751	15	663	CHIMBORAZO	GUANANDO	2017-01-01	11.7384063629443	1Highlands	2.47199256805827	3.8
3584	070354	22.5	1411	EL ORO	SAN JOSE	2019-01-01	2.22878285021488	2Coastal	2.56730996172786	3.8
3585	092550	25.3	789	GUAYAS	NARCISA DE JESUS	2020-01-01	136.813246493227	2Coastal	2.48423965682619	3.8
3586	140450	21.7	4065	MORONA SANTIAGO	PALORA (METZERA)	2020-01-01	123.574904805953	3Amazonic	2.46293370250244	3.8
3587	190452	12	772	ZAMORA CHINCHIPE	TUTUPALI	2017-01-01	449.904222729453	3Amazonic	2.52917633857064	3.8
464	180551	13.6	841	TUNGURAHUA	EL TRIUNFO	2017-01-01	51.1817737843243	1Highlands	2.52094564829539	3.8
465	071052	24.6	1022	EL ORO	LA BOCANA	2019-01-01	61.6100249095931	2Coastal	2.46148622624332	3.8
466	110551	22.5	1495	LOJA	BUENAVISTA	2020-01-01	44.3318836917623	1Highlands	2.49518587448153	3.8
467	140454	21.1	3830	MORONA SANTIAGO	SANGAY (CAB EN NAYAMANACA)	2020-01-01	195.923312425204	3Amazonic	2.48532643709531	3.8
468	240153	24.1	438	SANTA ELENA	CHANDUY	2019-01-01	773.181382023579	2Coastal	2.42683543020061	3.8
1508	020650	21.9	1919	BOLIVAR	CALUMA	2019-01-01	176.818939703829	1Highlands	2.07675009096445	3.7
1509	150158	18.3	3337	NAPO	SAN JUAN DE MUYUNA	2018-01-01	182.345555783371	3Amazonic	2.56503183313584	3.7
1510	210350	25.4	3052	SUCUMBIOS	PUERTO EL CARMEN DEL PUTUMAYO	2019-01-01	1196.32500549894	3Amazonic	2.78521906042162	3.7
1511	220453	24.2	3280	ORELLANA	SAN JOSE DE PAYAMINO	2020-01-01	832.406239714398	3Amazonic	2.44644471064187	3.7
1512	071255	23.9	1139	EL ORO	TORATA	2020-01-01	65.3526655272154	2Coastal	2.42579913712769	3.7
1513	111152	12.1	686	LOJA	EL TABLON	2017-01-01	96.6453396407425	1Highlands	2.56065192749785	3.7
1514	130251	24.8	1541	MANABI	MEMBRILLO	2019-01-01	121.204960511822	2Coastal	2.57252419534516	3.7
1515	120351	24.3	2189	LOS RIOS	LA ESMERALDA	2020-01-01	65.9818353082315	2Coastal	2.35870581066242	3.7
2548	060552	13.2	684	CHIMBORAZO	COMPUD	2017-01-01	28.7718607015061	1Highlands	2.50039445528383	3.7
2549	150754	17.8	2480	NAPO	SAN FRANCISCO DE BORJA (VIRGILIO DAVILA)	2017-01-01	136.63552642351	3Amazonic	2.45801197528188	3.7
2550	210352	25.3	3150	SUCUMBIOS	PUERTO BOLIVAR (PUERTO MONTUFAR)	2019-01-01	375.354828441766	3Amazonic	2.79631589759272	3.7
2551	010252	13.7	600	AZUAY	SAN GERARDO	2017-01-01	51.8835872539907	1Highlands	2.53939486656813	3.7
2552	071359	18.4	937	EL ORO	SALVIAS	2018-01-01	97.0755766023239	2Coastal	2.44113040286124	3.7
2553	111160	21.1	743	LOJA	SUMAYPAMBA	2020-01-01	90.9338986241777	1Highlands	2.52392038921099	3.7
2554	130651	22.7	962	MANABI	AMERICA	2019-01-01	78.104162989491	2Coastal	2.52421191538487	3.7
3588	080255	21.6	2151	ESMERALDAS	LUIS VARGAS TORRES (CAB. EN PLAYA DE ORO)	2018-01-01	730.855058229939	2Coastal	2.44074522480503	3.7
3589	170850	23.1	3715	PICHINCHA	PEDRO VICENTE MALDONADO	2019-01-01	623.110789207164	1Highlands	2.15530431986589	3.7
3590	210651	24.2	3090	SUCUMBIOS	SANTA ROSA DE SUCUMBIOS	2019-01-01	54.2168969368234	3Amazonic	2.65301605204731	3.7
3591	011150	15.2	836	AZUAY	CHORDELEG	2019-01-01	16.2957361498751	1Highlands	2.39716041466101	3.7
3592	090450	25.7	1364	GUAYAS	BALZAR	2018-01-01	1187.98579200606	2Coastal	2.17728866296424	3.7
3593	111250	21.1	1096	LOJA	SOZORANGA	2020-01-01	289.178128093804	1Highlands	2.43563224011676	3.7
3594	131151	24.7	1820	MANABI	BARRAGANETE	2019-01-01	427.51775443148	2Coastal	2.50538327510016	3.7
469	080355	25.1	1491	ESMERALDAS	SALIMA	2020-01-01	43.4471484165439	2Coastal	2.719301446031	3.7
470	180151	13	551	TUNGURAHUA	AMBATILLO	2017-01-01	12.4120377337722	1Highlands	2.64589465417143	3.7
471	210750	25.1	3250	SUCUMBIOS	TARAPOA	2018-01-01	1134.55801976656	3Amazonic	2.36448685148479	3.7
472	030157	12.3	933	CAÑAR	RIVERA	2017-01-01	219.377186169106	1Highlands	2.51230771201803	3.7
473	111054	19.2	1418	LOJA	MERCADILLO	2019-01-01	27.910585666319	1Highlands	2.55987376736006	3.7
474	120950	25.5	1588	LOS RIOS	PALENQUE	2019-01-01	579.757127169424	2Coastal	2.38276392021649	3.7
475	131552	25.5	751	MANABI	ANGEL PEDRO GILER (LA ESTANCILLA)	2019-01-01	67.1902646216515	2Coastal	2.4353244637721	3.7
1516	150156	23.5	3979	NAPO	PUERTO NAPO	2020-01-01	214.648329227995	3Amazonic	2.30660008353745	3.6
1517	210254	20.9	3465	SUCUMBIOS	PUERTO LIBRE	2018-01-01	701.889638645818	3Amazonic	2.4062204185406	3.6
1518	230155	23.8	3253	SANTO DOMINGO DE LOS TSACHILAS	VALLE HERMOSO	2018-01-01	309.838428606474	2Coastal	2.2002773984233	3.6
1519	110351	20.7	791	LOJA	EL TAMBO	2019-01-01	204.394892349932	1Highlands	2.36076789022256	3.6
1520	140257	14.7	853	MORONA SANTIAGO	SAN MIGUEL DE CUYES	2018-01-01	220.378063060347	3Amazonic	2.41054559069145	3.6
2555	080259	24.9	2648	ESMERALDAS	SANTO DOMINGO DE ONZOLE	2020-01-01	677.218232745483	2Coastal	2.4528444052141	3.6
2556	150450	18.4	2636	NAPO	EL CHACO	2017-01-01	70.3307772578849	3Amazonic	2.34689415805951	3.6
2557	210454	24.6	3611	SUCUMBIOS	SAN PEDRO DE LOS COFANES	2019-01-01	71.3382455701556	3Amazonic	2.47964806173136	3.6
2558	071055	22.5	1497	EL ORO	SAN ROQUE (AMBROSIO MALDONADO)	2019-01-01	45.6344130305087	2Coastal	2.45675938472248	3.6
2559	130157	24	1239	MANABI	CHIRIJOS	2019-01-01	76.5646736932384	2Coastal	2.4711465215906	3.6
2560	140852	16.8	2459	MORONA SANTIAGO	SAN CARLOS DE LIMON	2019-01-01	677.83978045083	3Amazonic	2.43799121610037	3.6
3595	080551	19.5	2184	ESMERALDAS	ALTO TAMBO (CAB EN GUADUAL)	2017-01-01	1092.68644203656	2Coastal	2.39951630625334	3.6
3596	160166	21.7	4417	PASTAZA	EL TRIUNFO	2020-01-01	237.352667614578	3Amazonic	2.34316950365157	3.6
3597	220355	24.5	3570	ORELLANA	LAGO SAN PEDRO	2019-01-01	75.8923672222981	3Amazonic	2.46737208412303	3.6
3598	092850	25.1	828	GUAYAS	ISIDRO AYORA	2020-01-01	487.755472323231	2Coastal	2.37618814013048	3.6
3599	130354	24.5	1914	MANABI	CHIBUNGA	2018-01-01	570.888905889416	2Coastal	2.28588530207551	3.6
476	080754	25.1	1964	ESMERALDAS	MONTALVO (CAB EN HORQUETA)	2020-01-01	377.913411655041	2Coastal	2.41194529667631	3.6
477	210157	24.4	3080	SUCUMBIOS	JAMBELI	2019-01-01	444.417418386517	3Amazonic	2.52207950337742	3.6
478	220450	24.1	3268	ORELLANA	LORETO	2020-01-01	94.8330260817182	3Amazonic	2.56009985865249	3.6
479	110162	17.3	1210	LOJA	YANGANA (ARSENIO CASTILLO)	2018-01-01	269.425276492096	1Highlands	2.60825056642076	3.6
480	130852	24	228	MANABI	SANTA MARIANITA (BOCA DE PACOCHE)	2020-01-01	38.4489122994528	2Coastal	2.83989119289934	3.6
1521	080454	25.3	1734	ESMERALDAS	VICHE	2020-01-01	90.9626381912251	2Coastal	2.3258824264078	3.5
1522	220151	24.7	3246	ORELLANA	DAYUMA	2020-01-01	1230.80554420568	3Amazonic	2.42277073953863	3.5
1523	110159	14.5	939	LOJA	SANTIAGO	2017-01-01	101.933513513499	1Highlands	2.36306314591168	3.5
1524	111155	13.2	633	LOJA	SAN ANTONIO DE QUMBE (CUMBE)	2017-01-01	78.1610228523968	1Highlands	2.38706760384511	3.5
1525	130658	23.9	345	MANABI	PUERTO DE CAYO	2020-01-01	171.397495838148	2Coastal	2.40930178568609	3.5
1526	240155	24.4	682	SANTA ELENA	SIMON BOLIVAR (JULIO MORENO)	2020-01-01	573.630196005613	2Coastal	2.27893531370626	3.5
2561	080560	26	2383	ESMERALDAS	TAMBILLO	2020-01-01	213.159180585892	2Coastal	2.57068860163175	3.5
2562	010956	13.4	651	AZUAY	SAN JOSE DE RARANGA	2017-01-01	51.9098445344355	1Highlands	2.46070676029538	3.5
2563	110352	19.4	1048	LOJA	GUAYQUICHUMA	2019-01-01	105.971847355435	1Highlands	2.370902781922	3.5
2564	111157	18.6	676	LOJA	SAN SEBASTIAN DE YULUC	2019-01-01	115.508036604449	1Highlands	2.39336401240723	3.5
2565	131052	22.7	823	MANABI	CASCOL	2019-01-01	430.049698854009	2Coastal	2.37203150293205	3.5
2566	080851	24.7	2335	ESMERALDAS	MONTERREY	2019-01-01	102.302324622777	2Coastal	2.31656677655832	3.5
3600	080251	25.7	2709	ESMERALDAS	ANCHAYACU	2020-01-01	245.921247013163	2Coastal	2.46074126244517	3.5
3601	170168	19	1957	PICHINCHA	NANEGAL	2017-01-01	244.864996963452	1Highlands	2.30366680420347	3.5
3602	011352	13.7	1322	AZUAY	PALMAS	2018-01-01	70.0723447882998	1Highlands	2.41389415740179	3.5
3603	110756	21.9	787	LOJA	SACAPALCA	2020-01-01	111.013739186659	1Highlands	2.43726483680357	3.5
3604	130355	24.3	1025	MANABI	ELOY ALFARO	2018-01-01	346.149415617327	2Coastal	2.32398944000665	3.5
3605	131850	24.6	1358	MANABI	OLMEDO	2019-01-01	253.641831873112	2Coastal	2.24611491721811	3.5
481	080254	25.9	2126	ESMERALDAS	LA TOLA	2020-01-01	151.648317840994	2Coastal	2.58106601902767	3.5
482	210354	25.1	3587	SUCUMBIOS	SANTA ELENA	2019-01-01	515.229428903159	3Amazonic	2.65477536649714	3.5
483	071351	21	910	EL ORO	ABAÑIN	2020-01-01	65.0180502501171	2Coastal	2.40010087969423	3.5
484	110951	19.2	1269	LOJA	CANGONAMA	2019-01-01	44.0318682175691	1Highlands	2.40630396481597	3.5
485	130650	23.3	652	MANABI	JIPIJAPA	2019-01-01	398.867227625326	2Coastal	2.24379632520428	3.5
486	190551	19.6	2366	ZAMORA CHINCHIPE	CHICAÑA	2020-01-01	267.511326898228	3Amazonic	2.29159701211838	3.5
1527	080256	26	2425	ESMERALDAS	MALDONADO	2020-01-01	57.3876194987321	2Coastal	2.48581603219896	3.4
1528	220159	24.7	3377	ORELLANA	NUEVO PARAISO (CAB. EN UNION )	2020-01-01	305.243516086083	3Amazonic	2.33077139632176	3.4
1529	010354	12.8	927	AZUAY	MARIANO MORENO	2017-01-01	33.9533661706922	1Highlands	2.30178024672575	3.4
1530	110251	18.2	1233	LOJA	COLAISACA	2019-01-01	195.767162204494	1Highlands	2.38641799816211	3.4
1531	130551	24.2	1792	MANABI	SAN FRANCISCO DE NOVILLO (CAB. EN NOVILLO)	2018-01-01	261.419896948876	2Coastal	2.33896158102966	3.4
1532	140158	18.4	2607	MORONA SANTIAGO	SINAI	2020-01-01	394.488330344453	3Amazonic	2.29058127174749	3.4
2567	150153	24.1	3208	NAPO	CHONTAPUNTA	2020-01-01	970.951255624739	3Amazonic	2.35459488338387	3.4
2568	230153	24.2	2735	SANTO DOMINGO DE LOS TSACHILAS	LUZ DE AMERICA	2019-01-01	310.740162039313	2Coastal	2.24049542782899	3.4
2569	010357	15.1	784	AZUAY	SAN JUAN	2017-01-01	34.6774637138144	1Highlands	2.17864589201017	3.4
2570	110950	18.8	1061	LOJA	CATACOCHA	2020-01-01	441.328157318235	1Highlands	2.1246762442652	3.4
2571	130657	22.6	744	MANABI	PEDRO PABLO GOMEZ	2019-01-01	284.322467004032	2Coastal	2.3218459255096	3.4
2572	190854	17	1391	ZAMORA CHINCHIPE	LA CANELA	2018-01-01	238.644184490568	3Amazonic	2.54513615113056	3.4
3606	040254	18.9	592	CARCHI	SAN VICENTE DE PUSIR	2017-01-01	43.0526355586689	1Highlands	2.4445614662231	3.4
3607	170161	18.5	2363	PICHINCHA	GUALEA	2017-01-01	120.730220531193	1Highlands	2.32269013750431	3.4
3608	230154	24.5	2744	SANTO DOMINGO DE LOS TSACHILAS	SAN JACINTO DEL BUA	2019-01-01	204.312793876094	2Coastal	1.94059886394261	3.4
3609	090653	25.3	1024	GUAYAS	LAUREL	2020-01-01	36.5673049938179	2Coastal	2.30769828101423	3.4
3610	130351	24.5	908	MANABI	BOYACA	2018-01-01	235.321144002641	2Coastal	2.25618239201968	3.4
3611	130750	24.9	983	MANABI	JUNIN	2018-01-01	246.289084466966	2Coastal	2.10933533959522	3.4
3612	240154	24.2	356	SANTA ELENA	MANGLARALTO	2019-01-01	425.40199767637	2Coastal	2.2388595130707	3.4
487	080252	25.6	3011	ESMERALDAS	ATAHUALPA (CAB. EN CAMARONES)	2020-01-01	246.24704439255	2Coastal	2.35282351669637	3.4
488	170185	14.4	948	PICHINCHA	YARUQUI	2017-01-01	72.3118892804246	1Highlands	2.22868776652893	3.4
489	010352	12.7	923	AZUAY	DANIEL CORDOVA TORAL (EL ORIENTE)	2017-01-01	21.1996759367376	1Highlands	2.34718531097515	3.4
490	110160	15.2	1013	LOJA	TAQUIL (MIGUEL RIOFRIO)	2017-01-01	92.5043806390307	1Highlands	2.3888647620261	3.4
491	130451	24.5	2304	MANABI	WILFRIDO LOOR MOREIRA (MAICITO)	2018-01-01	290.555557789075	2Coastal	2.29039453079064	3.4
492	131050	23.7	925	MANABI	PAJAN	2019-01-01	153.802662105994	2Coastal	2.28117384108402	3.4
1533	050754	17.1	2290	COTOPAXI	PALO QUEMADO	2017-01-01	116.266870411258	1Highlands	2.33437457427062	3.3
1534	210252	22.4	3546	SUCUMBIOS	GONZALO PIZARRO	2019-01-01	238.241542422549	3Amazonic	2.28654924550207	3.3
1535	010166	13.7	811	AZUAY	SIDCAY	2017-01-01	16.7254568111772	1Highlands	2.28591886697943	3.3
1536	010562	13.3	933	AZUAY	DUG DUG	2017-01-01	37.590292430924	1Highlands	2.27037961104895	3.3
1537	110353	19.5	900	LOJA	SAN PEDRO DE LA BENDITA	2019-01-01	148.027955828194	1Highlands	2.27145880043547	3.3
1538	130850	24.3	249	MANABI	MANTA	2019-01-01	192.624190545434	2Coastal	2.30502649160572	3.3
2573	060254	16.4	849	CHIMBORAZO	HUIGRA	2018-01-01	129.61474161512	1Highlands	2.21032439699407	3.3
2574	210650	23.9	3038	SUCUMBIOS	EL DORADO DE CASCALES	2019-01-01	1085.25335257672	3Amazonic	2.21962435598849	3.3
2575	010250	15.6	639	AZUAY	GIRON	2018-01-01	240.201366293613	1Highlands	2.27392638608859	3.3
2576	030252	13.4	788	CAÑAR	SAN FRANCISCO DE SAGEO	2017-01-01	3.94487642830104	1Highlands	2.31952609487661	3.3
2577	111550	19.8	975	LOJA	QUILANGA	2019-01-01	92.3001182466908	1Highlands	2.24344157230822	3.3
2578	131152	23.8	1726	MANABI	SAN SEBASTIAN	2019-01-01	142.487320312515	2Coastal	2.2669988696833	3.3
3613	100352	18.7	2298	IMBABURA	GARCIA MORENO (LLURIMAGUA)	2017-01-01	696.82255288606	1Highlands	2.20267679044244	3.3
3614	220451	23.5	3452	ORELLANA	AVILA (CAB. EN HUIRUNO)	2020-01-01	330.158439056227	3Amazonic	2.36576195809867	3.3
3615	010356	12.4	908	AZUAY	REMIGIO CRESPO TORAL (GULAG)	2017-01-01	29.7282362856338	1Highlands	2.34594442014296	3.3
3616	071051	22.8	1474	EL ORO	CAPIRO (CAB. EN LA CAPILLA DE CAPIRO)	2019-01-01	144.528452346036	2Coastal	2.1686275277994	3.3
3617	111552	16.8	1149	LOJA	SAN ANTONIO DE LAS ARADAS (CAB. EN LAS ARADAS)	2018-01-01	107.799916149942	1Highlands	2.32754525068649	3.3
3618	190156	19.2	1801	ZAMORA CHINCHIPE	TIMBARA	2019-01-01	127.957615571441	3Amazonic	2.34566388652852	3.3
493	050352	14.5	1380	COTOPAXI	PINLLOPATA	2017-01-01	31.5148053626263	1Highlands	2.49051185838251	3.3
494	210150	24.6	3410	SUCUMBIOS	NUEVA LOJA	2018-01-01	327.070498123342	3Amazonic	2.20511033243314	3.3
495	010160	14.6	787	AZUAY	PACCHA	2017-01-01	25.5730393865633	1Highlands	2.23325684530235	3.3
496	010552	13.5	878	AZUAY	BULAN (JOSE VICTOR IZQUIERDO)	2017-01-01	38.7778350763103	1Highlands	2.30596711476017	3.3
497	092350	25.1	1611	GUAYAS	CORONEL MARCELINO MARIDUEÑA (SAN CARLOS)	2020-01-01	254.410258523689	2Coastal	2.2634791344198	3.3
498	130153	25	328	MANABI	CRUCITA	2020-01-01	62.7364415399919	2Coastal	2.3797074846964	3.3
499	190750	21.6	2331	ZAMORA CHINCHIPE	ZUMBI	2020-01-01	163.495423070032	3Amazonic	2.20634952054609	3.3
1539	020155	13.9	1203	BOLIVAR	SALINAS	2020-01-01	469.496571079585	1Highlands	1.89535815045553	3.2
1540	080558	25.8	2511	ESMERALDAS	SAN JAVIER DE CACHAVI (CAB. EN SAN JAVIER)	2020-01-01	41.7939819012811	2Coastal	2.41576639293748	3.2
1541	210455	24.7	3546	SUCUMBIOS	SIETE DE JULIO	2019-01-01	123.655439713414	3Amazonic	2.27880485143182	3.2
1542	030358	15.7	799	CAÑAR	SAN ANTONIO	2018-01-01	348.098634960324	1Highlands	2.23149090086297	3.2
1543	090654	25.3	926	GUAYAS	LIMONAL	2020-01-01	48.1272814048464	2Coastal	2.20991287858887	3.2
1544	110656	19.2	1029	LOJA	EL AIRO	2019-01-01	28.1908436471276	1Highlands	2.40274943140819	3.2
1545	130156	23.6	1439	MANABI	SAN PLACIDO	2019-01-01	136.645155421396	2Coastal	2.24687146478682	3.2
1546	140251	16.5	1377	MORONA SANTIAGO	AMAZONAS (ROSARIO DE CUYES)	2019-01-01	287.548665009796	3Amazonic	2.14710918959867	3.2
1547	120754	24.3	2174	LOS RIOS	LOS ANGELES	2020-01-01	49.3610216110299	2Coastal	2.18266374745461	3.2
2579	080262	25.8	2751	ESMERALDAS	COLON ELOY DEL MARIA	2020-01-01	71.5651489377928	2Coastal	2.36373303227247	3.2
2580	170174	17.4	892	PICHINCHA	PERUCHO	2017-01-01	9.78323011850079	1Highlands	2.33871797455183	3.2
2581	210752	25.2	3243	SUCUMBIOS	AGUAS NEGRAS	2019-01-01	454.779094117203	3Amazonic	2.46098915853382	3.2
2582	030650	13.2	797	CAÑAR	DELEG	2017-01-01	61.051391353483	1Highlands	2.2255170009213	3.2
2583	092750	24.4	2076	GUAYAS	GRAL. ANTONIO ELIZALDE (BUCAY)	2020-01-01	153.235211827161	2Coastal	2.04247893502639	3.2
2584	110751	18.8	1101	LOJA	CHANGAIMINA (LA LIBERTAD)	2019-01-01	120.435863375187	1Highlands	2.26772657985483	3.2
2585	131653	24.4	1211	MANABI	ARQ. SIXTO DURAN BALLEN	2019-01-01	79.959439770993	2Coastal	2.20908480209383	3.2
2586	190550	22.1	2216	ZAMORA CHINCHIPE	YANTZAZA (YANZATZA)	2020-01-01	271.679804320245	3Amazonic	2.05307477809768	3.2
2587	150356	19	4256	NAPO	HATUN SUMAKU	2018-01-01	391.019368589893	3Amazonic	2.20622395940948	3.2
3619	080263	25.8	3090	ESMERALDAS	SAN JOSE DE CAYAPAS	2020-01-01	120.639109410621	2Coastal	2.27252997108075	3.2
3620	210155	24.6	3646	SUCUMBIOS	EL ENO	2019-01-01	445.129223010212	3Amazonic	2.22976960985371	3.2
3621	220152	24.6	3318	ORELLANA	TARACOA (NUEVA ESPERANZA: YUCA)	2020-01-01	411.719561566775	3Amazonic	2.29141093724571	3.2
3622	071050	21.9	1538	EL ORO	PIÑAS	2019-01-01	121.740753007581	2Coastal	2.11664563024604	3.2
3623	110161	19.5	896	LOJA	VILCABAMBA (VICTORIA)	2019-01-01	159.326090404878	1Highlands	2.22778425096826	3.2
3624	110753	19.8	877	LOJA	NAMBACOLA	2019-01-01	297.582951648837	1Highlands	2.19568889641904	3.2
3625	131752	24.2	1006	MANABI	10 DE AGOSTO	2018-01-01	233.310892517321	2Coastal	2.1811958482927	3.2
3626	190950	19.3	2702	ZAMORA CHINCHIPE	PAQUISHA	2020-01-01	166.382953793443	3Amazonic	2.31008547599147	3.2
500	080264	25.8	2668	ESMERALDAS	TIMBIRE	2020-01-01	21.9186253596308	2Coastal	2.38878428966501	3.2
501	210158	24.5	3439	SUCUMBIOS	SANTA CECILIA	2019-01-01	232.803762617352	3Amazonic	2.29421967677702	3.2
502	220351	24.6	3546	ORELLANA	ENOKANQUI	2019-01-01	75.6458968931888	3Amazonic	2.25545647882016	3.2
503	090550	25.1	1245	GUAYAS	COLIMES	2019-01-01	545.244005398063	2Coastal	2.06990802477186	3.2
504	110650	15.8	1145	LOJA	AMALUZA	2017-01-01	122.672011054376	1Highlands	2.27941585371631	3.2
505	111050	22.2	1675	LOJA	ALAMOR	2020-01-01	238.931790843548	1Highlands	2.11331953570681	3.2
506	132150	25.2	267	MANABI	JARAMIJO	2019-01-01	97.3014686080113	2Coastal	2.34127636234066	3.2
507	080850	24.5	2751	ESMERALDAS	LA CONCORDIA	2020-01-01	81.3682817434316	2Coastal	2.05394305244924	3.2
1548	150451	19.1	3618	NAPO	GONZALO DIAZ DE PINEDA (EL BOMBON)	2018-01-01	1931.75958054042	3Amazonic	2.1336798540533	3.1
1549	080654	25.2	932	ESMERALDAS	TONSUPA	2020-01-01	84.0807797689104	2Coastal	2.19417739755778	3.1
1550	030363	20.7	1306	CAÑAR	DUCUR	2020-01-01	87.1494449252391	1Highlands	2.17186655971553	3.1
1551	110250	19.2	1101	LOJA	CARIAMANGA	2019-01-01	373.740811152576	1Highlands	2.13963462101503	3.1
1552	111153	18.1	718	LOJA	LLUZHAPA	2019-01-01	73.0372406717176	1Highlands	2.18841377066961	3.1
1553	132250	24.6	608	MANABI	SAN VICENTE	2018-01-01	323.05940878199	2Coastal	2.09644508600147	3.1
1554	190853	14.5	1195	ZAMORA CHINCHIPE	VALLADOLID	2017-01-01	519.598872302367	3Amazonic	2.21692021910454	3.1
2588	160350	21.6	4373	PASTAZA	SANTA CLARA	2020-01-01	243.480670306513	3Amazonic	2.15625040325661	3.1
2589	010153	15.4	716	AZUAY	CHAUCHA	2018-01-01	312.981986496953	1Highlands	2.24578758764278	3.1
2590	030750	15.1	797	CAÑAR	SUSCAL	2018-01-01	49.7875716841645	1Highlands	2.22291780470241	3.1
2591	110554	21.5	1351	LOJA	AMARILLOS	2020-01-01	21.5948739462357	1Highlands	2.32928420409835	3.1
2592	111551	16.5	1169	LOJA	FUNDOCHAMBA	2018-01-01	35.9738305530367	1Highlands	2.36372092857911	3.1
2593	140160	13.4	1888	MORONA SANTIAGO	ZUÑA (ZUÑAC)	2018-01-01	620.153320456703	3Amazonic	2.17519464636323	3.1
2594	210160	24.6	3356	SUCUMBIOS	10 DE AGOSTO	2019-01-01	50.2488257028431	3Amazonic	2.42359255258633	3.1
3627	060551	15.8	775	CHIMBORAZO	CAPZOL	2018-01-01	25.7239098857207	1Highlands	2.23368472465297	3.1
3628	180151	13	551	TUNGURAHUA	AMBATILLO	2019-01-01	12.4120377337722	1Highlands	2.36077108624645	3.1
3629	010950	12.6	852	AZUAY	SIGSIG	2017-01-01	147.214234951244	1Highlands	2.16698479927105	3.1
3630	090652	25.4	1009	GUAYAS	JUAN BAUTISTA AGUIRRE (LOS TINTOS)	2020-01-01	49.5964038571641	2Coastal	2.1225808609152	3.1
3631	110956	22.3	1612	LOJA	ORIANGA	2020-01-01	183.75337277801	1Highlands	2.14085230877179	3.1
3632	130550	24.2	1854	MANABI	FLAVIO ALFARO	2017-01-01	983.79524598871	2Coastal	1.96579263339912	3.1
3633	190259	16.7	1139	ZAMORA CHINCHIPE	SAN ANDRES	2018-01-01	313.131768802138	3Amazonic	2.41706811042355	3.1
508	080253	25.9	2604	ESMERALDAS	BORBON	2020-01-01	192.443014401919	2Coastal	2.24023598252503	3.1
509	220154	24.6	3337	ORELLANA	EL DORADO	2020-01-01	132.87201666989	3Amazonic	2.20723050259649	3.1
510	010955	13.1	770	AZUAY	SAN BARTOLOME	2017-01-01	37.8823061327023	1Highlands	2.17251107315744	3.1
511	090950	25	1736	GUAYAS	EL TRIUNFO	2019-01-01	395.408451486204	2Coastal	1.95028292403443	3.1
512	110958	22.2	1377	LOJA	CASANGA	2020-01-01	52.319040750101	1Highlands	2.14124712513807	3.1
513	131952	24.4	285	MANABI	SALANGO	2020-01-01	89.2356521340681	2Coastal	2.41501519742337	3.1
514	190451	20	1898	ZAMORA CHINCHIPE	LA PAZ	2020-01-01	319.891235347836	3Amazonic	2.23128539104536	3.1
1555	080556	26	2467	ESMERALDAS	CONCEPCION	2020-01-01	212.08683351293	2Coastal	2.1777088197498	3
1556	180253	15.1	1042	TUNGURAHUA	RIO VERDE	2018-01-01	246.267994069395	1Highlands	2.14269852441033	3
1557	220455	20.5	4277	ORELLANA	SAN VICENTE DE HUATICOCHA	2019-01-01	191.755513468012	3Amazonic	2.18585133460792	3
1558	011550	20.7	883	AZUAY	CAMILO PONCE ENRIQUEZ	2020-01-01	268.892478768855	1Highlands	2.18201230317747	3
1559	110158	16.6	1153	LOJA	SAN PEDRO DE VILCABAMBA	2018-01-01	67.6661120490786	1Highlands	2.2417228955972	3
1560	111252	19.6	1080	LOJA	TACAMOROS	2020-01-01	76.1426184490238	1Highlands	2.211100430579	3
1561	190151	22.1	1975	ZAMORA CHINCHIPE	CUMBARATZA	2020-01-01	169.481274656961	3Amazonic	2.06631006293305	3
2595	150354	22.2	4010	NAPO	SAN PABLO DE USHPAYACU	2020-01-01	152.429073317752	3Amazonic	2.20134259613014	3
2596	180852	14.9	608	TUNGURAHUA	EMILIO MARIA TERAN (RUMIPAMBA)	2017-01-01	16.8758683693363	1Highlands	2.15475602880518	3
2597	010358	13	768	AZUAY	ZHIDMAD	2017-01-01	43.3019330206007	1Highlands	2.18106990118924	3
2598	070351	18.4	1233	EL ORO	AYAPAMBA	2018-01-01	101.830921808611	2Coastal	2.09104886731241	3
2599	110350	22.3	733	LOJA	CATAMAYO (LA TOMA)	2020-01-01	145.153366790519	1Highlands	2.08045463810909	3
[truncated: 2,025 more rows]
